# Supplementary material for: C–H amination of enolizable and nonenolizable ketones
Source: Royal Society of Chemistry journal article supplement (doi:10.1039/d5ob00009b), 2025-01-01
Supplement: d5ob00009b1.pdf [file d5ob00009b1.pdf]

## Supporting Information

### **C–H amination of enolizable and nonenolizable ketones**

Oksana Holovko-Kamoshenkova,<sup>a,c</sup> Zdeněk Tošner,<sup>a</sup> Ivana Císařová<sup>b</sup> and Radim Hrdina<sup>\*a</sup>

## 1. Contents

|                                                                       |     |
|-----------------------------------------------------------------------|-----|
| 2. General information .....                                          | S2  |
| 3. Experimental procedures .....                                      | S3  |
| 3.1 Preparation and characterization of cyanohydrins <b>2</b> .....   | S3  |
| 3.2 Preparation and characterisation of carbonazidates <b>3</b> ..... | S6  |
| 3.3 Preparation and characterisation of carbamates <b>4</b> . ....    | S11 |
| 3.4 Preparation and characterisation of compounds <b>5-13</b> .....   | S19 |
| 3.5 Additional experiments.....                                       | S22 |
| 4. NMR spectra of compounds 2-12 .....                                | S24 |
| 5. Crystallographic data collection and refinement details .....      | S72 |

## 2. General information

NMR spectra were recorded on Bruker 400 or 600 MHz spectrometers at room temperature (25 °C) unless otherwise stated. <sup>1</sup>H-NMR chemical shifts are given in ppm relative to Me<sub>4</sub>Si with the solvent resonance used as the internal standard (CDCl<sub>3</sub> δ = 7.26 ppm). <sup>13</sup>C-NMR (60, 101 or 150 MHz) chemical shifts are given in ppm relative to Me<sub>4</sub>Si with the solvent resonance used as the internal standard (CDCl<sub>3</sub> = 77.16 ppm). IR spectra were recorded using an ATR sampler (Thermo Nicolet - Avatar 370 5T-IR) and are reported in wave numbers (cm<sup>-1</sup>). Melting points (m.p.) were measured in open capillary tubes and are uncorrected. All reactions involving air sensitive compounds were carried out under anhydrous and inert atmosphere (N<sub>2</sub> or argon) by means of an inert gas/vacuum double manifold line and standard Schlenk techniques. High resolution mass spectra were recorded with Bruker Micro TOF LC.

### 3. Experimental procedures

#### 3.1 Preparation and characterization of cyanohydrins **2**.

**Method a):** Sodium bisulfite ( $\text{NaHSO}_3$ , 6 mmol) was dissolved in 8–15 mL of distilled water with continuous stirring until fully dissolved. The corresponding ketone (6 mmol) was then gradually added to the solution. The mixture was stirred thoroughly at 45°C for 10 minutes before being cooled to 10°C. Potassium cyanide (KCN, 7 mmol) was slowly introduced to the cooled reaction mixture with vigorous stirring. Once all reagents were added, the reaction was allowed to stir at room temperature overnight. The crude product was extracted with diethyl ether ( $\text{Et}_2\text{O}$ ,  $3 \times 5$  mL), dried over magnesium sulfate ( $\text{MgSO}_4$ ), and concentrated under reduced pressure to yield the final product. According to this procedure cyanohydrins **2a** (87%), **2b** (74%), **2c** (81%), **2g** (89%), **2h** (91%) were obtained. Reference: CHOI, Dae Kyu et al. (2022), Korean Patent No WO2022025636 A1.

**Method b):**  $\text{CO}_2$  was bubbled through ethanol (10 mL) at 35 °C for 5–10 minutes. Potassium cyanide (KCN, 5 mmol) was then gradually added to the stirring solution while maintaining  $\text{CO}_2$  bubbling for an additional 15 minutes. The corresponding ketone (4 mmol) was introduced, and the reaction mixture was stirred at 35°C under a continuous  $\text{CO}_2$  atmosphere for 18 hours. Upon completion of the reaction, 1M HCl (3 mL) was added, and the product was extracted with dichloromethane ( $3 \times 5$  mL). The combined organic layers were dried over  $\text{MgSO}_4$  and concentrated under reduced pressure to yield the final product. According to this procedure cyanohydrin **2d** (72%), was obtained. Reference: T. Roy, M. Kim, Y. Yang, S. Kim, G. Kang, X. Ren, *ACS Catal.* 2019, **9**, 6006–6011.

**Method c):** Trimethylsilyl cyanide (3 mmol) and boron trifluoride diethyl etherate (2 mmol) were added to a solution of corresponding ketone (2 mmol) in dichloromethane (5 mL). The mixture was stirred at room temperature for 2 h and the solvent was evaporated to dryness. The residue, thus obtained, was dissolved in ethyl acetate (10 mL), washed with brine ( $2 \times 5$  mL) and dried ( $\text{Na}_2\text{SO}_4$ ). After filtration and evaporation of the solvent, the residue was filtered through the silica using DCM:EtOAc (2:1 v/v) as the eluent. According to this procedure cyanohydrins **2a - 2h and 8** were obtained in yields **2a** (92%), **2b** (91%), **2c** (87%), **2d** (84%), **2e** (91%), **2f** (94%), **2g** (93%), **2h** (89%). Reference: de Castro, Sonia; et al. *Chem. Eur. J.* 2008, **14**, 9620-9632.

**Method d):** To a 4 mL vial were sequentially added ketone (5.0 mmol), anhydrous MeCN (1.0 mL), and phosphorane (0.1 mol%). Then the vial was put into a water bath at r.t., and stirred for 5 min before the addition of TMS-CN (5.5 mmol, 695  $\mu\text{L}$ ). After TLC analysis indicated the full consumption of ketone, the mixture underwent column chromatography using petroleum ether/diethyl ether (from 10:0 to 10:1, v/v) as the eluent. According to this procedure cyanohydrine **2a** was obtained in high yield and can be used for next step. Reference: W-B. Wu, X-P. Zeng, and J. Zhou, *J. Org. Chem.* 2020, **85**, 14342–14350.

### 3.1.1 Compound 2a

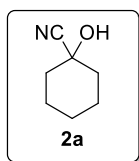

**<sup>1</sup>H NMR** (600 MHz, CDCl<sub>3</sub>): δ/ppm = 1.23-1.32 (m, 1H), 1.50-1.68 (m, 5H), 1.74-1.83 (m, 2H), 2.04-2.10 (m, 2H), 3.22 (bs, 1H).

**<sup>13</sup>C NMR** (101 MHz, CDCl<sub>3</sub>): δ/ppm = 22.6 (2CH<sub>2</sub>), 24.5 (2CH<sub>2</sub>), 38.0 (CH<sub>2</sub>), 66.0 (C), 122.01 (CN).

Compound **2a** was prepared in one step from cyclohexanone according to the procedure described in de Castro, Sonia; et al. *Chemistry - A European Journal*. **2008**, 14(31), 9620-9632. Product **2a** was obtained by eluting the reaction mixture through a pad of silica gel with hexane : Et<sub>2</sub>O 2:1 and used in the next step without further purification.

### 3.1.2 Compound 2b

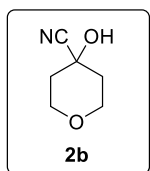

**<sup>1</sup>H NMR** (400 MHz, CDCl<sub>3</sub>): δ/ppm = 1.85-1.92 (m, 2H), 2.10-2.16 (m, 2H), 3.32 (bs, 1H), 3.65-3.71 (m, 2H), 3.92-3.98 (m, 2H).

**<sup>13</sup>C NMR** (101 MHz, CDCl<sub>3</sub>): δ/ppm = 37.7 (2CH<sub>2</sub>), 63.8 (2CH<sub>2</sub>), 66.6 (C), 121.2 (CN).

Compound **2b** was prepared in one step from tetrahydropyran-4-one according to the procedure described in de Castro, Sonia; et al. *Chemistry - A European Journal*. **2008**, 14(31), 9620-9632. Product **2b** was obtained by eluting the reaction mixture through a pad of silica gel with hexane : Et<sub>2</sub>O 1:1 and used in the next step without further purification.

### 3.1.3 Compound 2c

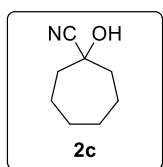

**<sup>1</sup>H NMR** (400 MHz, CDCl<sub>3</sub>): δ/ppm = 1.58-1.76 (m, 7H), 1.89-1.96 (m, 2H), 2.13 -2.18 (m, 2H), 2.48-2.51 (m, 1H), 2.92 (bs, 1H).

**<sup>13</sup>C NMR** (101 MHz, CDCl<sub>3</sub>): δ/ppm = 21.6 (2CH<sub>2</sub>), 27.8 (2CH<sub>2</sub>), 41.1 (2CH<sub>2</sub>), 72.5 (C), 123.05 (CN).

Compound **2c** was prepared in one steps from cycloheptanone according to the procedure described in de Castro, Sonia; et al. *Chemistry - A European Journal*. **2008**, 14(31), 9620-9632. Product **2c** was obtained by eluting the reaction mixture through a pad of silica gel with hexane : Et<sub>2</sub>O 1:1 and used in the next step without further purification.

### 3.1.4 Compound 2d

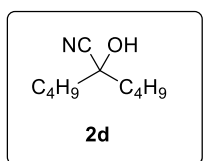

**<sup>1</sup>H NMR** (600 MHz, CDCl<sub>3</sub>): δ/ppm = 0.94 (t, *J* = 8 Hz, 6H), 1.34-1.43 (m, 4H), 1.47-1.59 (m, 4H), 1.68-1.81 (m, 4H), 2.63 (bs, 1H).

**<sup>13</sup>C NMR** (101 MHz, CDCl<sub>3</sub>): δ/ppm = 14.0 (2CH<sub>3</sub>), 22.6 (2CH<sub>2</sub>), 26.1 (2CH<sub>2</sub>), 40.0 (2CH<sub>2</sub>), 72.4 (C) 121.6 (CN).

Compound **2d** was prepared in one step from nonan-5-one according to the procedure described in de Castro, Sonia; et al. *Chemistry - A European Journal*. **2008**, 14(31), 9620-9632. Product

**2d** was purified by silica gel column chromatography eluting with pure  $\text{CHCl}_3$  and was isolated in a 73% yield.

### 3.1.5 Compound 2e

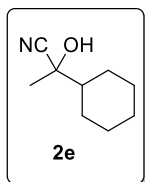

**$^1\text{H}$  NMR** (600 MHz,  $\text{CDCl}_3$ ):  $\delta/\text{ppm}$  = 1.10-1.30 (m, 5H), 1.51-1.59 (m, 1H), 1.55 (s, 3H), 1.67-1.73 (m, 1H), 1.82-1.88 (m, 3H), 1.95-2.01 (m, 1H), 2.87 (bs, 1H).

**$^{13}\text{C}$  NMR** (101 MHz,  $\text{CDCl}_3$ ):  $\delta/\text{ppm}$  = 25.2 ( $\text{CH}_3$ ), 25.8 ( $\text{CH}_2$ ), 25.9 ( $\text{CH}_2$ ), 26.0 ( $\text{CH}_2$ ), 27.1 ( $\text{CH}_2$ ), 27.3 ( $\text{CH}_2$ ), 47.2 (CH), 72.2 (C) 121.8 (CN).

Compound **2e** was prepared in one step from cyclohexyl methyl ketone according to the procedure described in de Castro, Sonia; et al. *Chemistry - A European Journal*. **2008**, 14(31), 9620-9632. Product **2e** was purified by silica gel column chromatography eluting with hexane :  $\text{Et}_2\text{O}$  1:1 and isolated in a 78% yield.

### 3.1.6 Compound 2f

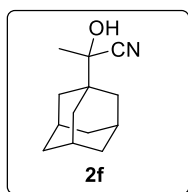

**$^1\text{H}$  NMR** (400 MHz,  $\text{CDCl}_3$ ):  $\delta/\text{ppm}$  = 1.53 (s, 3H), 1.65-1.75 (m, 12H), 2.08-2.09 (m, 3H), 2.26 (bs, 1H).

**$^{13}\text{C}$  NMR** (101 MHz,  $\text{CDCl}_3$ ):  $\delta/\text{ppm}$  = 21.8 ( $\text{CH}_3$ ), 28.2 ( $3\text{CH}_2$ ) 36.1 ( $3\text{CH}$ ), 36.7 ( $3\text{CH}_2$ ), 39.0 (C), 75.81 (C), 121.6 (CN).

Compound **2f** was prepared in one step from 1-acetyladamantane according to the procedure described in de Castro, Sonia; et al. *Chemistry - A European Journal*. **2008**, 14(31), 9620-9632. Product **2f** was purified by silica gel column chromatography eluting with hexane :  $\text{Et}_2\text{O}$  1:1 and isolated in a 86% yield.

### 3.1.7 Compound 2g

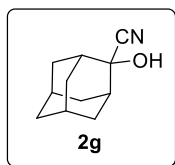

**$^1\text{H}$  NMR** (400 MHz,  $\text{CDCl}_3$ ):  $\delta/\text{ppm}$  = 1.58-1.63 (m, 2H), 1.71-1.73 (m, 2H), 1.78-1.81- (m, 1H), 1.88-1.93 (m, 3H), 2.06-2.16 (m, 6H), 3.08 (bs, 1H)

**$^{13}\text{C}$  NMR** (101 MHz,  $\text{CDCl}_3$ ):  $\delta/\text{ppm}$  = 26.3 (CH), 26.4 (CH), 30.8 ( $2\text{CH}_2$ ), 35.0 ( $2\text{CH}$ ), 37.0 ( $2\text{CH}_2$ ), 37.1 ( $\text{CH}_2$ ), 74.1 (C), 122.5 (CN).

Compound **2g** was prepared in one step from adamantan-2-one according to the procedure described in de Castro, Sonia; et al. *Chemistry - A European Journal*. **2008**, 14(31), 9620-9632. Product **2g** was purified by silica gel column chromatography eluting with hexane :  $\text{Et}_2\text{O}$  1:1 and isolated in a 83% yield.

### 3.1.8 Compound 2h

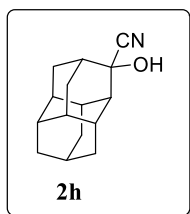

**<sup>1</sup>H NMR** (400 MHz, CDCl<sub>3</sub>): δ/ppm = 1.55-1.87 (m, 12H), 2.00-2.14 (m, 6H), 2.43-2.63 (m, 1H).

**<sup>13</sup>C NMR** (101 MHz, CDCl<sub>3</sub>): δ/ppm = 25.8 (CH), 31.0 (CH<sub>2</sub>), 31.5 (CH), 35.0 (CH), 35.0 (CH), 35.2 (CH<sub>2</sub>), 35.2 (CH<sub>2</sub>), 35.2 (CH), 35.7 (CH), 36.8 (CH), 37.0 (CH<sub>2</sub>), 37.4 (CH<sub>2</sub>), 45.7 (CH), 74.9 (C), 122.3 (CN).

Compound **2h** was prepared in one step from diamantan-2-one according to the procedure described in de Castro, Sonia; et al. *Chemistry - A European Journal*. **2008**, 14(31), 9620-9632. Product **2h** was obtained by eluting the reaction mixture through a pad of silica gel with hexane : Et<sub>2</sub>O 2:1 and used in the next step without further purification.

## 3.2 Preparation and characterisation of carbonazidates 3

### 3.2.1 Compound 3a

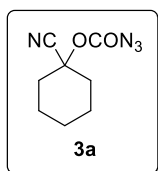

Starting material **2a** (200 mg, 1.60 mmol) was dissolved in anhydrous pyridine (3 mL), the solution was cooled to -10 °C and NaN<sub>3</sub> (210 mg, 3.20 mmol) was carefully added to the solution. Triphosgene (240 mg, 0.80 mmol) was dissolved in anhydrous DCM (2 mL) at 0 °C and added dropwise to the reaction mixture at -10 °C. The reaction mixture was stirred for 15 min. at -10 °C then was allowed to reach r.t. and stirred for 1 h at r.t. After that the reaction mixture was heated at 50 °C for additional 5 hours. The reaction was quenched with water and the product was extracted using Et<sub>2</sub>O. The combined organic fractions were dried over MgSO<sub>4</sub>, concentrated *in vacuo* and the product was purified by column chromatography on silica gel using hexane: Et<sub>2</sub>O 2:1 as a mobile phase. The compound **3a** was obtained as a white solid (230 mg) in 73% yield.

**m.p.** (cryst. from Et<sub>2</sub>O/Hexane 1:1): 68.5 °C.

**R<sub>f</sub>** (silica gel; Et<sub>2</sub>O : *n*-hexane 1:1): 0.7.

**<sup>1</sup>H NMR** (400 MHz, CDCl<sub>3</sub>): δ/ppm = 1.30-1.40 (m, 1H), 1.59-1.69 (m, 3H), 1.72-1.80 (m, 2H), 1.85-1.91 (m, 2H), 2.28-2.34 (m, 2H).

**<sup>13</sup>C NMR** (101 MHz, CDCl<sub>3</sub>): δ/ppm = 22.1 (2CH<sub>2</sub>), 24.3 (2CH<sub>2</sub>), 35.0 (CH<sub>2</sub>), 76.2 (C), 117.5 (CN), 155.5(C).

**IR** (neat):  $\tilde{\nu}$  /cm<sup>-1</sup> = 2945, 2866, 2673, 2383, 2189, 2156, 1738, 1450, 1267, 1227, 1209, 1165, 1144, 1095, 1041, 1028, 976, 951, 930, 906, 852, 748, 700, 656, 623, 588, 559, 525, 476, 449, 434, 407.

**HRMS**: *m/z* = 217.0698 ([M+Na]<sup>+</sup>; calculated for C<sub>8</sub>H<sub>10</sub>N<sub>4</sub>NaO<sub>2</sub><sup>+</sup>, *m/z* = 217.0696).

### 3.2.2 Compound 3b

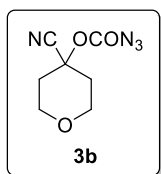

Starting material **2b** (200 mg, 1.57 mmol) was dissolved in anhydrous Pyridine (3 mL), the solution was cooled to -10 °C and NaN<sub>3</sub> (204 mg, 3.14 mmol) was carefully added to the solution. Triphosgene (230 mg, 0.79 mmol) was dissolved in anhydrous DCM (2 mL) at 0 °C and added dropwise to the reaction mixture at -10 °C. The reaction mixture was stirred for 15 min. at -10 °C then was allowed to reach r.t. and stirred for 1 h at r.t. After that the reaction mixture was heated at 50 °C for additional 5 hours. The reaction was quenched with water and the product was extracted using Et<sub>2</sub>O. The combined organic fractions were dried over MgSO<sub>4</sub>, concentrated *in vacuo* and the product was purified by column chromatography on silica gel using hexane: Et<sub>2</sub>O 2:1 as a mobile phase. The compound **3b** was obtained as a colourless oil (210 mg) in 68% yield.

R<sub>f</sub> (silica gel; Et<sub>2</sub>O : *n*-hexane 1:1): 0.6.

<sup>1</sup>H NMR (400 MHz, CDCl<sub>3</sub>): δ/ppm = 2.05-2.12 (m, 2H), 2.35-2.40 (m, 2H), 3.69-3.75 (m, 2H), 3.90-3.96 (m, 2H).

<sup>13</sup>C NMR (101 MHz, CDCl<sub>3</sub>): δ/ppm = 35.1 (2CH<sub>2</sub>), 63.6 (2CH<sub>2</sub>), 73.2 (C), 116.7 (CN), 155.6 (C).

IR (neat):  $\tilde{\nu}$  /cm<sup>-1</sup> = 2976, 2943, 2866, 2702, 2387, 2197, 2168, 1755, 1471, 1452, 1431, 1360, 1279, 1255, 11167, 1151, 1103, 1053, 1009, 964, 935, 918, 889, 845, 771, 746, 594, 569, 557, 517, 498, 447, 413.

HRMS: m/z = 219.0501 ([M+Na]<sup>+</sup>; calculated for C<sub>7</sub>H<sub>8</sub>N<sub>4</sub>NaO<sub>3</sub><sup>+</sup>, m/z = 219.0489).

### 3.2.3 Compound 3c

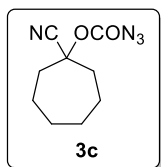

Starting material **2c** (200 mg, 1.44 mmol) was dissolved in anhydrous pyridine (3 mL), the solution was cooled to -10 °C and NaN<sub>3</sub> (187 mg, 2.88 mmol) was carefully added to the solution. Triphosgene (213 mg, 0.719 mmol) was dissolved in anhydrous DCM (2 mL) at 0 °C and added dropwise to the reaction mixture at -10 °C. The reaction mixture was stirred for 15 min. at -10 °C then was allowed to reach r.t. and stirred for 1 h at r.t. After that the reaction mixture was heated at 50 °C for additional 5 hours. The reaction was quenched with water and the product was extracted using Et<sub>2</sub>O. The combined organic fractions were dried over MgSO<sub>4</sub>, concentrated *in vacuo* and the product was purified by column chromatography on silica gel using hexane: Et<sub>2</sub>O 2:1 as a mobile phase. The compound **3c** was obtained as a colourless oil (200 mg) in 67% yield.

R<sub>f</sub> (silica gel; Et<sub>2</sub>O : *n*-hexane 1:1): 0.7

<sup>1</sup>H NMR (400 MHz, CDCl<sub>3</sub>): δ/ppm = 1.62-1.77 (m, 8H), 2.14-2.20 (m, 2H), 2.35-2.42 (m, 2H).

<sup>13</sup>C NMR (101 MHz, CDCl<sub>3</sub>): δ/ppm = 21.6 (2CH<sub>2</sub>), 27.8 (2CH<sub>2</sub>), 38.05 (2CH<sub>2</sub>), 79.0 (C), 118.5 (CN), 155.6 (C).

**IR** (neat):  $\tilde{\nu}$  /cm<sup>-1</sup> = 2937, 2664, 2389, 2191, 2137, 1738, 1464, 1448, 1367, 1290, 1248, 1228, 1166, 1149, 1122, 1011, 987, 951, 908, 847, 783, 748, 690, 658, 559, 498, 405.

**HRMS**:  $m/z$  = 231.0853 ([M+Na]<sup>+</sup>; calculated for C<sub>9</sub>H<sub>12</sub>N<sub>4</sub>NaO<sub>2</sub>+ H<sub>2</sub>O  $m/z$  = 231.0852).

### 3.2.4 Compound 3d

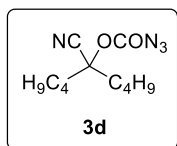

Starting material **2d** (200 mg, 1.18 mmol) was dissolved in anhydrous pyridine (3 mL), the solution was cooled to -10 °C and NaN<sub>3</sub> (154 mg, 2.36 mmol) was carefully added to the solution. Triphosgene (176 mg, 0.591 mmol) was dissolved in anhydrous DCM (2 mL) at 0 °C and added dropwise to the reaction mixture at -10 °C. The reaction mixture was stirred for 15 min. at -10 °C then was allowed to reach r.t. and stirred for 1 h at r.t. After that the reaction mixture was heated at 50 °C for additional 5 hours. The reaction was quenched with water and the product was extracted using Et<sub>2</sub>O. The combined organic fractions were dried over MgSO<sub>4</sub>, concentrated *in vacuo* and the product was purified by column chromatography on silica gel using CHCl<sub>3</sub> as a mobile phase. The compound **3d** was obtained as a colourless oil (200 mg) in 71% yield.

**R<sub>f</sub>** (silica gel; CHCl<sub>3</sub>): 0.6

**<sup>1</sup>H NMR** (400 MHz, CDCl<sub>3</sub>):  $\delta$ /ppm = 0.91-0.95 (m, 6H), 1.33-1.54 (m, 8H), 1.94-2.09 (m, 4H).

**<sup>13</sup>C NMR** (101 MHz, CDCl<sub>3</sub>):  $\delta$ /ppm = 13.9 (2CH<sub>3</sub>), 22.4 (2CH<sub>2</sub>), 25.8 (2CH<sub>2</sub>), 36.3 (2CH<sub>2</sub>), 79.4 (C), 117.4 (CN), 155.7 (C).

**IR** (neat):  $\tilde{\nu}$  /cm<sup>-1</sup> = 2960, 2933, 2868, 2736, 2193, 2139, 1734, 1468, 1381, 1246, 1209, 1163, 1147, 1130, 1059, 1039, 991, 899, 777, 750, 611, 559, 499, 415.

**HRMS**:  $m/z$  = 261.1322 ([M+Na]<sup>+</sup>; calculated for C<sub>11</sub>H<sub>18</sub>N<sub>4</sub>NaO<sub>2</sub><sup>+</sup>  $m/z$  = 261.1322).

### 3.2.5 Compound 3e

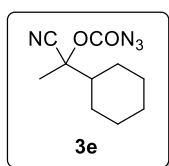

Starting material **2e** (200 mg, 1.31 mmol) was dissolved in anhydrous Pyridine (3 mL), the solution was cooled to -10 °C and NaN<sub>3</sub> (170 mg, 2.61 mmol) was carefully added to the solution. Triphosgene (194 mg, 0.650 mmol) was dissolved in anhydrous DCM (2 mL) at 0 °C and added dropwise to the reaction mixture at -10 °C. The reaction mixture was stirred for 15 min. at -10 °C then was allowed to reach r.t. and stirred for 1 h at r.t. After that the reaction mixture was heated at 50 °C for additional 5 hours. The reaction was quenched with water and the product was extracted using Et<sub>2</sub>O. The combined organic fractions were dried over MgSO<sub>4</sub>, concentrated *in vacuo* and the product was purified by column chromatography on silica gel using Hexane : EtOAc (15%) as a mobile phase. The compound **3e** was obtained as a colourless oil (226 mg) in 78% yield.

**R<sub>f</sub>** (silica gel; *n*-hexane : EtOAc (15%)) : 0.8

**<sup>1</sup>H NMR** (400 MHz, CDCl<sub>3</sub>):  $\delta$ /ppm = 1.20-1.37 (m, 5H), 1.72-1.77 (m, 1H), 1.79 (s, 3H), 1.86-2.02 (m, 5H).

**$^{13}\text{C}$  NMR** (101 MHz,  $\text{CDCl}_3$ ):  $\delta/\text{ppm}$  = 20.2 ( $\text{CH}_3$ ), 25.3 ( $\text{CH}_2$ ), 25.4 ( $\text{CH}_2$ ), 25.6 ( $\text{CH}_2$ ), 26.4 ( $\text{CH}_2$ ), 26.7 ( $\text{CH}_2$ ), 45.7 ( $\text{CH}$ ), 78.7 (C), 117.1 (CN), 155.6 (C).

**IR** (neat):  $\tilde{\nu}/\text{cm}^{-1}$  = 2999, 2935, 2858, 2702, 2663, 2395, 2183, 2137, 1734, 1452, 1381, 1309, 1250, 1232, 1180, 1153, 1132, 1103, 1068, 1047, 960, 912, 895, 877, 849, 771, 750, 671, 625, 596, 625, 559, 509, 478, 434, 409.

**HRMS**:  $m/z$  = 245.1005 ( $[\text{M}+\text{Na}]$ ; calculated for  $\text{C}_{10}\text{H}_{14}\text{N}_4\text{NaO}_2^+$   $m/z$  = 245.1009).

### 3.2.6 Compound 3f

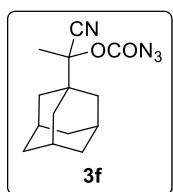

Starting material **2f** (200 mg, 0.97 mmol) was dissolved in anhydrous pyridine (3 mL), the solution was cooled to  $-10\text{ }^\circ\text{C}$  and  $\text{NaN}_3$  (127 mg, 1.94 mmol) was carefully added to the solution. Triphosgene (145 mg, 0.49 mmol) was dissolved in anhydrous DCM (2 mL) at  $0\text{ }^\circ\text{C}$  and added dropwise to the reaction mixture at  $-10\text{ }^\circ\text{C}$ . The reaction mixture was stirred for 15 min. at  $-10\text{ }^\circ\text{C}$  then was allowed to reach r.t. and stirred for 1 h at r.t. After that the reaction mixture was heated at  $50\text{ }^\circ\text{C}$  for additional 5 hours. The reaction was quenched with water and the product was extracted using  $\text{Et}_2\text{O}$ . The combined organic fractions were dried over  $\text{MgSO}_4$ , concentrated *in vacuo* and the product was purified by column chromatography on silica gel using Hexane :  $\text{Et}_2\text{O}$  (1:1) as a mobile phase. The compound **3f** was obtained as a white solid (224 mg) in 84% yield.

**m.p.** (cryst. from  $\text{Et}_2\text{O}$  : *n*-hexane 1:1):  $86.2\text{ }^\circ\text{C}$ .

**R<sub>f</sub>** (silica gel; *n*-hexane :  $\text{Et}_2\text{O}$  1:1) : 0.7

**$^1\text{H}$  NMR** (400 MHz,  $\text{CDCl}_3$ ):  $\delta/\text{ppm}$  = 1.63-1.72 (m, 9H), 1.74 (s, 3H), 1.75-1.80 (m, 3H), 2.06-2.10 (m, 3H).

**$^{13}\text{C}$  NMR** (101 MHz,  $\text{CDCl}_3$ ):  $\delta/\text{ppm}$  = 17.6 ( $\text{CH}_3$ ), 28.1 (3CH), 35.9 (3 $\text{CH}_2$ ), 36.4 (3 $\text{CH}_2$ ), 39.9 (C), 82.1 (C), 116.8 (CN), 155.9 (C).

**IR** (neat):  $\tilde{\nu}/\text{cm}^{-1}$  = 3016, 2933, 2908, 2854, 2679, 2387, 2195, 2131, 1734, 1726, 1452, 1377, 1363, 1344, 1294, 1271, 1254, 1236, 1174, 1147, 1076, 1043, 978, 958, 941, 818, 752, 742, 698, 650, 596, 438, 426.

**HRMS**:  $m/z$  = 297.1317 ( $[\text{M}+\text{Na}]$ ; calculated for  $\text{C}_{14}\text{H}_{18}\text{N}_4\text{NaO}_2^+$   $m/z$  = 297.1322).

### 3.2.7 Compound 3g

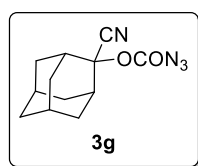

Starting material **2g** (200 mg, 1.13 mmol) was dissolved in anhydrous pyridine (3 mL), the solution was cooled to  $-10\text{ }^\circ\text{C}$  and  $\text{NaN}_3$  (148 mg, 2.26 mmol) was carefully added to the solution. Triphosgene (168 mg, 0.056 mmol) was dissolved in anhydrous DCM (2 mL) at  $0\text{ }^\circ\text{C}$  and added dropwise to the reaction mixture at  $-10\text{ }^\circ\text{C}$ . The reaction mixture was stirred for 15 min. at  $-10\text{ }^\circ\text{C}$  then was allowed to reach r.t. and stirred for 1 h at r.t. After that the reaction mixture was heated at  $50\text{ }^\circ\text{C}$  for additional 5 hours. The reaction was quenched with water and the product was extracted using  $\text{Et}_2\text{O}$ . The combined organic fractions were dried

over MgSO<sub>4</sub>, concentrated *in vacuo* and the product was purified by column chromatography on silica gel using hexane: Et<sub>2</sub>O 2:1 as a mobile phase. The compound **3g** was obtained as a white solid (225 mg) in 81% yield.

**m.p.** (cryst. from CHCl<sub>3</sub>): 68.4 °C.

**R<sub>f</sub>** (silica gel; Et<sub>2</sub>O : *n*-hexane 1:1): 0.7.

**<sup>1</sup>H NMR** (400 MHz, CDCl<sub>3</sub>): δ/ppm = 1.67-1.72 (m, 2H), 1.76-1.78 (m, 2H), 1.85-1.87 (m, 1H), 1.92-2.00 (m, 5H), 2.14-2.19 (m, 2H), 2.58-2.62 (m, 2H).

**<sup>13</sup>C NMR** (101 MHz, CDCl<sub>3</sub>): δ/ppm = 25.9 (CH), 26.1 (CH), 31.2 (2CH<sub>2</sub>), 34.6 (CH), 34.6 (2CH<sub>2</sub>), 36.8 (CH<sub>2</sub>), 81.0 (C), 117.8 (CN), 155.6 (C).

**IR** (neat):  $\tilde{\nu}$  /cm<sup>-1</sup> = 2937, 2910, 2866, 2848, 2673, 2393, 2191, 2143, 1739, 1454, 1354, 1342, 1282, 1217, 1120, 1101, 1049, 1014, 991, 926, 768, 748, 723, 673, 644, 555, 467.

**HRMS**: *m/z* = 269.1008 ([M+Na]<sup>+</sup>; calculated for C<sub>12</sub>H<sub>14</sub>N<sub>4</sub>NaO<sub>2</sub><sup>+</sup>, *m/z* = 269.1009).

### 3.2.8 Compound 3h

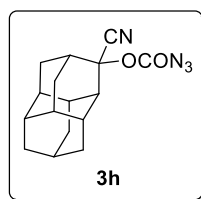

Starting material **2h** (200 mg, 0.87 mmol) was dissolved in anhydrous Pyridine (3 mL), the solution was cooled to -10 °C and NaN<sub>3</sub> (113 mg, 1.74 mmol) was carefully added to the solution. C<sub>3</sub>Cl<sub>6</sub>O<sub>3</sub> (130 mg, 0.44 mmol) was dissolved in anhydrous DCM (2 mL) at 0 °C and added dropwise to the reaction mixture at -10 °C. Reaction mixture was stirred for 15 min. at -10 °C then was allowed to reach r.t. and stirred for 1 h at r.t. After that the reaction mixture was heated at 50 °C for additional 5 hours. The reaction was quenched with water and the product was extracted using Et<sub>2</sub>O. Combined organic fractions were dried over MgSO<sub>4</sub>, concentrated *in vacuo* and the product was purified by column chromatography on silica gel using hexane: Et<sub>2</sub>O 2:1 as a mobile phase. The compound **3h** was obtained as a white solid (260 mg) in a 72% yield.

**m.p.** (cryst. from CHCl<sub>3</sub>): 93.1 °C.

**R<sub>f</sub>** (silica gel; (Et<sub>2</sub>O : *n*-hexane 2:1) 0.8

**<sup>1</sup>H NMR** (400 MHz, CDCl<sub>3</sub>): δ/ppm = 1.63 – 1.70 (m, 2H), 1.71-1.77 (m, 6H), 1.79-1.81 (m, 1H), 1.91–1.82 (m, 3H), 2.0 – 1.92 (m, 2H), 2.13 (dq, *J* = 13.9, 3.0 Hz, 1H), 2.19-2.21 (m, 1H), 2.46-2.48 (m, 1H), 2.50-2.52 (m, 1H).

**<sup>13</sup>C NMR** (101 MHz, CDCl<sub>3</sub>): δ/ppm = 25.5 (CH), 31.5 (CH), 31.9 (CH<sub>2</sub>), 32.6 (CH), 34.8 (CH<sub>2</sub>), 34.8(CH), 35.1 (CH), 35.2 (CH), 36.6 (CH), 36.7 (CH<sub>2</sub>), 36.8 (CH<sub>2</sub>), 37.2 (CH<sub>2</sub>), 42.9 (CH), 117.6 (CN), 155.6 (C).

**IR** (neat):  $\tilde{\nu}$  /cm<sup>-1</sup> = 2914, 2893, 2852, 2758, 2682, 2638, 2380, 2185, 2154, 2133, 1822, 1732, 1462, 1441, 1346, 1259, 1219, 1194, 1128, 1065, 1049, 1001, 984, 937, 779, 769, 752, 706, 559, 451.

**HRMS**: *m/z* = 321.1321 ([M+Na]<sup>+</sup>; calculated for C<sub>16</sub>H<sub>18</sub>N<sub>4</sub>NaO<sub>2</sub> *m/z* = 321.1322).

### 3.3 Preparation and characterisation of carbamates 4.

#### 3.3.1 Compound 4a

Carbonazide **3a** (200 mg, 1.03 mmol) was dissolved in anhydrous 1,2-DCE (5 mL) and the solution was heated in a sealed tube at 130 °C overnight. After that the reaction mixture was cooled down to room temperature and concentrated *in vacuo*. The crude product was obtained as a pale-yellow oil (144 mg) in a 84% yield combined. The ratio between *cis* and *trans* isomers was established from crude <sup>1</sup>H NMR to be 1:0.58 respectively.

##### 2.3.1.1 Compound 4a1

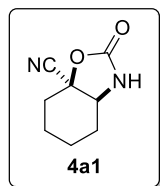

Compound **4a1** was isolated by silica gel column chromatography eluting with pure Et<sub>2</sub>O. Product **4a1** was obtained as a white crystalline solid (89 mg) in a 52% yield.

**m.p.** (cryst. from Et<sub>2</sub>O): 128.9 °C.

**R<sub>f</sub>** (silica gel; Et<sub>2</sub>O): 0.6.

**<sup>1</sup>H NMR** (400 MHz, CDCl<sub>3</sub>): δ/ppm = 1.41-1.49 (m, 1H), 1.59-1.68 (m, 4H), 1.95-2.03 (m, 1H), 2.10-2.17 (m, 1H), 2.25-2.32 (m, 1H), 4.05 (t, *J* = 5.9 Hz, 1H), 6.10 (brs, 1H).

**<sup>13</sup>C NMR** (101 MHz, CDCl<sub>3</sub>): δ/ppm = 18.5 (CH<sub>2</sub>), 18.8 (CH<sub>2</sub>), 27.8 (CH<sub>2</sub>), 31.5 (CH<sub>2</sub>), 55.7 (CH), 74.8 (C), 118.3 (CN), 157.2 (C).

**IR** (neat):  $\tilde{\nu}$  /cm<sup>-1</sup> = 3492, 3402, 3236, 3157, 2954, 2871, 2775, 1851, 1778, 1739, 1620, 1556, 1466, 1448, 1392, 1371, 1366, 1311, 282, 1242, 1192, 1167, 1086, 1072, 1032, 941, 912, 876, 856, 775, 717, 694, 606, 584, 544, 526, 457.

**HRMS**: *m/z* = 189.0636 ([M+Na]<sup>+</sup>; calculated for C<sub>8</sub>H<sub>10</sub>N<sub>2</sub>NaO<sub>2</sub><sup>+</sup>, *m/z* = 189.0634).

##### 2.3.1.2 Compound 4a2

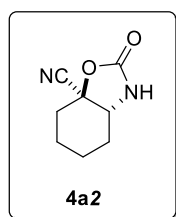

Compound **4a2** was isolated by silica gel column chromatography eluting with pure Et<sub>2</sub>O. Product **4a2** was obtained as a colourless oil (43 mg) in a 25% yield.

**R<sub>f</sub>** (silica gel; Et<sub>2</sub>O): 0.53.

**<sup>1</sup>H NMR** (400 MHz, CDCl<sub>3</sub>): δ/ppm = 1.50 – 1.35 (m, 1H), 1.89 – 1.73 (m, 2H), 1.97 – 1.89 (m, 2H), 2.06 – 1.97 (m, 1H), 2.19 – 2.11 (m, 1H), 2.45 – 2.36 (m, 1H), 3.56 (dd, *J* = 12.4, 3.1 Hz, 1H), 6.15 (s, 1H).

**<sup>13</sup>C NMR** (101 MHz, CDCl<sub>3</sub>): δ/ppm = 22.6 (CH<sub>2</sub>), 22.8 (CH<sub>2</sub>), 26.5 (CH<sub>2</sub>), 32.0 (CH<sub>2</sub>), 62.6 (CH), 82.6 (C), 116.8 (CN), 158.1 (C).

**IR** (neat):  $\tilde{\nu}$  /cm<sup>-1</sup> = 3292, 3182, 2929, 2862, 2692, 2239, 1836, 1776, 1755, 1537, 1462, 1408, 1302, 1265, 1149, 1134, 1097, 1080, 1070, 1045, 1020, 970, 947, 930, 918, 891, 868, 841, 800, 769, 721, 663, 633, 582, 557, 546, 523, 471, 461, 436.

**HRMS**: *m/z* = 189.0635 ([M+Na]<sup>+</sup>; calculated for C<sub>8</sub>H<sub>10</sub>N<sub>2</sub>NaO<sub>2</sub><sup>+</sup>, *m/z* = 189.0634).

### 3.3.2 Compound 4b

Carbonazidate **3b** (200 mg, 1.03 mmol) was dissolved in anhydrous 1,2-DCE (5 mL) and the solution was heated in a sealed tube at 130 °C overnight. After that the reaction mixture was cooled down to room temperature and concentrated *in vacuo*. The crude product was obtained as a pale-yellow oil (152 mg) in a 87% yield combined. The ratio between *cis* and *trans* isomers was established from crude <sup>1</sup>H NMR to be 0.83:1 respectively.

#### 2.3.2.1 Compound 4b1

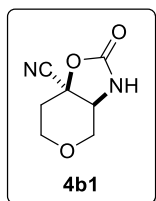

Compound **4b1** was isolated by silica gel column chromatography eluting with pure DCM. Product **4b1** was obtained as a white crystalline solid (52 mg) in a 34% yield.

**m.p.** (cryst. from DCM): 136.9 °C.

**R<sub>f</sub>** (DCM): 0.5.

**<sup>1</sup>H NMR** (400 MHz, CDCl<sub>3</sub>): δ/ppm = 2.33-2.45 (m, 2H), 3.53-3.58 (m, 1H), 3.80-3.85 (m, 1H), 3.99-4.04 (m, 2H), 5.93 (brs, 1H).

**<sup>13</sup>C NMR** (101 MHz, CDCl<sub>3</sub>): δ/ppm = 31.3 (CH<sub>2</sub>), 53.3 (CH), 62.0 (CH<sub>2</sub>), 67.0 (CH<sub>2</sub>), 72.3 (C), 117.2 (CN), 156.2 (C).

**IR** (neat):  $\tilde{\nu}$  /cm<sup>-1</sup> = 3286, 2940, 1781, 1209, 1072, 921, 746, 570.

**HRMS**: m/z = 169.0607 ([M+H]<sup>+</sup>; calculated for C<sub>7</sub>H<sub>9</sub>N<sub>2</sub>O<sub>3</sub><sup>+</sup>, m/z = 169.0608).

#### 2.3.2.2 Compound 4b2

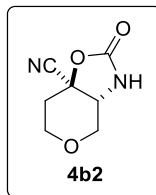

Compound **4b2** was isolated by silica gel column chromatography eluting with pure DCM. Product **4b2** was obtained as a white crystalline solid (62 mg) in a 41% yield.

**m.p.** (cryst. from DCM): 136.9 °C.

**R<sub>f</sub>** (silica gel; DCM): 0.5.

**<sup>1</sup>H NMR** (400 MHz, CDCl<sub>3</sub>): δ/ppm = 2.24-2.44 (m, 4H), 3.91-3.95 (m, 2H), 5.15-5.17 (m, 1H), 6.29 (brs, 1H).

**<sup>13</sup>C NMR** (101 MHz, CDCl<sub>3</sub>): δ/ppm = 33.2 (CH<sub>2</sub>), 35.2 (CH<sub>2</sub>), 55.2 (CH), 70.6 (CH<sub>2</sub>), 74.3 (C), 116.6 (CN), 150.4 (C).

**IR** (neat):  $\tilde{\nu}$  /cm<sup>-1</sup> = 3270, 3166, 2908, 1720, 1105, 1022, 800, 761, 624.

**HRMS**: m/z = 191.0427 ([M+Na]<sup>+</sup>; calculated for C<sub>7</sub>H<sub>8</sub>N<sub>2</sub>NaO<sub>3</sub><sup>+</sup>, m/z = 191.0427).

### 3.3.3 Compound 4c

Carbonazidate **3c** (200 mg, 0.96 mmol) was dissolved in anhydrous 1,2-DCE (5 mL) and the solution was heated in a sealed tube at 130 °C overnight. After that the reaction mixture was cooled down to room temperature and concentrated *in vacuo*. The crude product was obtained

as a pale-yellow oil (137 mg) in a 79% yield combined. The ratio between *cis* and *trans* isomers was established from crude  $^1\text{H}$  NMR to be 0.87:1 respectively.

### 2.3.3.1 Compound 4c1

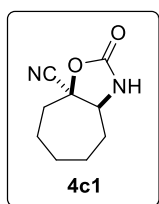

Compound **4c1** was isolated by silica gel column chromatography eluting with pure Et<sub>2</sub>O. Product **4c1** was obtained as a colourless oil (63 mg) in a 36% yield.

**R<sub>f</sub>** (silica gel; Et<sub>2</sub>O): 0.5.

**$^1\text{H}$  NMR** (400 MHz, CDCl<sub>3</sub>):  $\delta$ /ppm = 1.54 – 1.37 (m, 1H), 1.73 – 1.62 (m, 1H), 1.74-1.85 (m, 3H), 2.01 – 1.89 (m, 3H), 2.21 – 2.08 (m, 1H), 2.57 – 2.45 (m, 1H), 3.99 (dd, *J* = 11.6, 5.2 Hz, 1H), 6.36 (s, 1H).

**$^{13}\text{C}$  NMR** (101 MHz, CDCl<sub>3</sub>):  $\delta$ /ppm = 23.7 (CH<sub>2</sub>), 24.8 (CH<sub>2</sub>), 26.2 (CH<sub>2</sub>), 31.9 (CH<sub>2</sub>), 35.4 (CH<sub>2</sub>), 60.4 (CH), 82.5 (C), 116.8 (CN), 157.4 (C).

**IR** (neat):  $\tilde{\nu}$  /cm<sup>-1</sup> = 3504, 3251, 3168, 2945, 2864, 1913, 1792, 1759, 1712, 1450, 1388, 1350, 1290, 1261, 1228, 1207, 1165, 1111, 1038, 1012, 999, 958, 945, 899, 858, 812, 771, 673, 609, 580, 526, 451, 440.

**HRMS**: *m/z* = 203.0793 ([*M*+Na]; calculated for C<sub>9</sub>H<sub>12</sub>N<sub>2</sub>NaO<sub>2</sub><sup>+</sup> *m/z* = 203.0791).

### 2.3.3.2 Compound 4c2

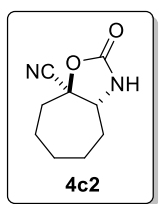

Compound **4c2-*cis*** was isolated by silica gel column chromatography eluting with pure Et<sub>2</sub>O. Product **4c2-*cis*** was obtained as a colourless oil (69 mg) in a 40% yield.

**R<sub>f</sub>** (silica gel; Et<sub>2</sub>O): 0.65.

**$^1\text{H}$  NMR** (400 MHz, CDCl<sub>3</sub>):  $\delta$ /ppm = 1.45-1.36 (m, 2H), 1.54 (m, 1H), 1.80-1.72 (m, 2H), 1.88-1.82 (m, 2H), 1.94 (m, 1H), 2.10 (m, 1H), 2.36 (m, 1H), 4.17 (m, 1H), 6.65 (s, 1H).

**$^{13}\text{C}$  NMR** (101 MHz, CDCl<sub>3</sub>):  $\delta$ /ppm = 23.1 (CH<sub>2</sub>), 25.2 (CH<sub>2</sub>), 29.9 (CH<sub>2</sub>), 31.9 (CH<sub>2</sub>), 35.1 (CH<sub>2</sub>), 62.1 (CH), 79.5 (C), 119.5 (CN), 156.3 (C).

**IR** (neat):  $\tilde{\nu}$  /cm<sup>-1</sup> = 3305, 3188, 2927, 2866, 2698, 2025, 1780, 1755, 1739, 1462, 1381, 1363, 1327, 1290, 1244, 1225, 1211, 1153, 1084, 1026, 985, 970, 947, 924, 850, 800, 754, 655, 580, 507, 457.

**HRMS**: *m/z* = 203.0793 ([*M*+Na]; calculated for C<sub>9</sub>H<sub>12</sub>N<sub>2</sub>NaO<sub>2</sub><sup>+</sup> *m/z* = 203.0791).

### 3.3.4 Compound 4d

Carbonazidate **3d** (200 mg, 0.95 mmol) was dissolved in anhydrous 1,2-DCE (5 mL) and the solution was heated in a sealed tube at 130 °C overnight. After that the reaction mixture was cooled down to room temperature and concentrated *in vacuo*. The crude product was obtained as a pale-yellow oil (176 mg) a 91% yield combined. The ratio between *cis* and *trans* isomers was established from crude  $^1\text{H}$  NMR to be 1:1.

### 2.3.4.1 Compound 4d1

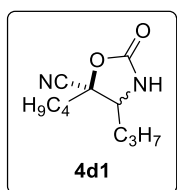

Compound **4d1** was isolated by silica gel column chromatography eluting with  $\text{CHCl}_3$  : *n*-hexane 2:1. Product **4d1** was obtained as a colourless oil (71 mg) in a 37% yield.

**R<sub>f</sub>** (silica gel;  $\text{CHCl}_3$  : *n*-hexane 2:1): 0.5.

**<sup>1</sup>H NMR** (400 MHz,  $\text{CDCl}_3$ ):  $\delta$ /ppm = 0.93-1.02 (m, 6H), 1.35-1.85 (m, 8H), 1.91-2.04 (m, 2H), 3.66-3.69 (m, 1H), 6.96 (brs, 1H).

**<sup>13</sup>C NMR** (101 MHz,  $\text{CDCl}_3$ ):  $\delta$ /ppm = 13.7 ( $\text{CH}_3$ ), 13.8 ( $\text{CH}_3$ ), 19.6 ( $\text{CH}_2$ ), 22.2 ( $\text{CH}_2$ ), 25.7 ( $\text{CH}_2$ ), 35.1 ( $\text{CH}_2$ ), 38.4 ( $\text{CH}_2$ ), 60.1 (CH), 81.5 (C), 115.5 (CN), 156.9 (C).

**IR** (neat):  $\tilde{\nu}$  / $\text{cm}^{-1}$  = 3265, 3163, 2960, 2933, 2873, 2740, 2243, 1770, 1466, 1381, 1275, 1126, 1011, 951, 883, 762, 669, 617, 532, 474, 455, 436.

**HRMS**:  $m/z$  = 233.1260 ( $[\text{M}+\text{Na}]$ ; calculated for  $\text{C}_{11}\text{H}_{18}\text{N}_2\text{NaO}_2^+$ ,  $m/z$  = 233.1260).

### 2.3.4.2 Compound 4d2

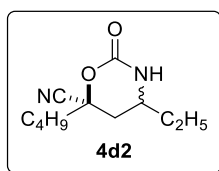

Compound **4d2** was isolated by silica gel column chromatography eluting with  $\text{CHCl}_3$  : *n*-hexane 2:1. Product was obtained as a white solid (60 mg) in a 31% yield.

**m.p.** (cryst. from Cyclohexane :  $\text{CHCl}_3$  1:1): 116.7 °C

**R<sub>f</sub>** (silica gel;  $\text{CHCl}_3$  : *n*-hexane 2:1): 0.4

**<sup>1</sup>H NMR** (400 MHz,  $\text{CDCl}_3$ ):  $\delta$ /ppm = 0.92-1.01 (m, 6H), 1.35-1.45 (m, 2H), 1.50-1.73 (m, 5H), 1.86-2.02 (m, 2H), 2.21-2.26 (m, 1H), 3.69-3.76 (m, 1H), 6.62 (brs, 1H).

**<sup>13</sup>C NMR** (101 MHz,  $\text{CDCl}_3$ ):  $\delta$ /ppm = 9.1 ( $\text{CH}_3$ ), 13.7 ( $\text{CH}_3$ ), 22.3 ( $\text{CH}_2$ ), 25.4 ( $\text{CH}_2$ ), 28.4 ( $\text{CH}_2$ ), 35.7 ( $\text{CH}_2$ ), 39.4 ( $\text{CH}_2$ ), 50.2 (CH), 75.7 (C), 117.7 (CN), 151.9 (C).

**IR** (neat):  $\tilde{\nu}$  / $\text{cm}^{-1}$  = 3402, 3246, 3136, 2965, 2935, 2875, 1759, 1722, 1462, 1406, 1346, 1325, 1304, 1182, 1120, 1103, 1080, 1028, 1014, 930, 868, 793, 766, 634, 523, 488, 440.

**HRMS**:  $m/z$  = 233.1260 ( $[\text{M}+\text{Na}]$ ; calculated for  $\text{C}_{11}\text{H}_{18}\text{N}_2\text{NaO}_2^+$ ,  $m/z$  = 233.1260).

### 3.3.5 Compound 4e

Carbonazidate **3e** (200 mg, 1.03 mmol) was dissolved in anhydrous 1,2-DCE (5 mL) and the solution was heated in a sealed tube at 130 °C overnight. After that the reaction mixture was cooled down to room temperature and concentrated *in vacuo*. The crude product was obtained as a pale-yellow oil (152 mg) in a 87% yield combined. The ratio between the two isomers was established from crude <sup>1</sup>H NMR to be 1:0.83.

### 2.3.5.1 Compound 4e1

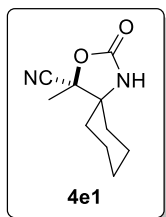

Compound **4e1** was isolated by silica gel column chromatography eluting with  $\text{CHCl}_3$  : EtOAc 1:1. Product **4e1** was obtained as a white crystalline solid (69 mg) in a 47% yield.

**m.p.** (cryst. from DCM): 136.9 °C.

**R<sub>f</sub>** (silica gel;  $\text{CHCl}_3$  : EtOAc 1:1): 0.5.

**<sup>1</sup>H NMR** (400 MHz,  $\text{CDCl}_3$ ):  $\delta$ /ppm = 1.24-1.31(m, 1H), 1.48-1.61 (m, 3H), 1.64-1.71 (m, 3H), 1.72 (s, 3H), 1.75-1.85 (m, 2H), 1.95-1.99 (m, 1H), 3.35 (brs, 1H).

**<sup>13</sup>C NMR** (101 MHz,  $\text{CDCl}_3$ ):  $\delta$ /ppm = 20.1 ( $\text{CH}_3$ ), 22.4 ( $\text{CH}_2$ ), 23.5 ( $\text{CH}_2$ ), 25.8 ( $\text{CH}_2$ ), 32.5 ( $\text{CH}_2$ ), 34.6 ( $\text{CH}_2$ ), 63.4 (C), 82.9 (C), 118.6 (CN), 157.6 (C).

**IR** (neat):  $\tilde{\nu}$  / $\text{cm}^{-1}$  = 3475, 3219, 3140, 2989, 2937, 2688, 2517, 2386, 2326, 2237, 1763, 1604, 1444, 1385, 1363, 1327, 1300, 1217, 1161, 1107, 1034, 960, 933, 914, 899, 866, 831, 769, 706, 530, 496, 469, 432.

**HRMS**:  $m/z$  = 217.0951 ( $[\text{M}+\text{Na}]$ ; calculated for  $\text{C}_{10}\text{H}_{14}\text{N}_2\text{NaO}_2^+$ ,  $m/z$  = 217.0947).

### 2.3.5.2 Compound 4e2

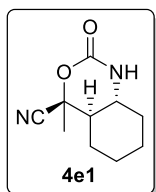

Compound **4e2** was isolated by silica gel column chromatography eluting with  $\text{CHCl}_3$  : EtOAc 1:1. Product **4e2** was obtained as a white crystalline solid (56 mg) in a 38% yield.

**m.p.** (cryst. from  $\text{CHCl}_3$ ): 214.5 °C.

**R<sub>f</sub>** (silica gel;  $\text{CHCl}_3$  : EtOAc 1:1): 0.4.

**<sup>1</sup>H NMR** (400 MHz,  $\text{CDCl}_3$ ):  $\delta$ /ppm = 1.22-1.46 (m, 4H), 1.69-1.73 (m, 1H), 1.75 (s, 3H), 1.81-2.06 (m, 4H), 3.26-3.31 (m, 1H), 3.37 (brs, 1H).

**<sup>13</sup>C NMR** (101 MHz,  $\text{CDCl}_3$ ):  $\delta$ /ppm = 24.6 ( $\text{CH}_3$ ), 24.7 ( $\text{CH}_2$ ), 25.9 ( $\text{CH}_2$ ), 26.3 ( $\text{CH}_2$ ), 32.7 ( $\text{CH}_2$ ), 46.2 (CH), 53.9 (CH), 78.1 (C), 118.7 (CN), 153.2 (C).

**IR** (neat):  $\tilde{\nu}$  / $\text{cm}^{-1}$  = 3211, 3118, 2949, 2993, 2871, 2362, 2268, 1716, 1522, 1448, 1414, 1358, 1342, 1298, 1238, 1207, 1140, 1084, 1049, 997, 924, 856, 843, 762, 746, 710, 665, 569, 523, 505, 476, 413

**HRMS**:  $m/z$  = 217.0951 ( $[\text{M}+\text{Na}]$ ; calculated for  $\text{C}_{10}\text{H}_{14}\text{N}_2\text{NaO}_2^+$ ,  $m/z$  = 217.0947).

### 3.3.6 Compound 4f

Carbonazide **3f** (200 mg, 0.73 mmol) was dissolved in anhydrous 1,2-DCE (5 mL) and the solution was heated in a sealed tube at 130 °C overnight. After that the reaction mixture was cooled down to room temperature and concentrated *in vacuo*. The crude product was obtained as a crystalline white solid (163 mg) in a 91% yield combined. The ratio between compound **4f1** and **4f2** according to crude <sup>1</sup>H NMR was 8:1. The ratio between the two **4f2** isomers was established from crude <sup>1</sup>H NMR to be 1:0.77.

### 2.3.6.1 Compound 4f1

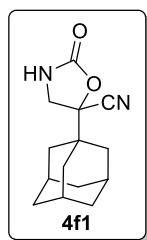

Compound **4f1** was isolated by silica gel column chromatography eluting with Et<sub>2</sub>O : *n*-hexane 1:1. Product **4f1** was obtained as a white crystalline solid (8.5 mg) in a 14% yield.

**m.p.** (cryst. from CHCl<sub>3</sub>): 280.1 °C.

**R<sub>f</sub>** (silica gel; Et<sub>2</sub>O : *n*-hexane 1:1) : 0.7.

**<sup>1</sup>H NMR** (400 MHz, CDCl<sub>3</sub>): δ/ppm = 1.65-1.79 (m, 12H), 2.11-2.14 (m, 3H), 3.78 (dd, *J* = 47.2, 9.5 Hz, 2H), 5.36 (bs, 1H).

**<sup>13</sup>C NMR** (101 MHz, CDCl<sub>3</sub>): δ/ppm = 27.7 (3CH), 35.5 (3 CH<sub>2</sub>), 36.4 (3CH<sub>2</sub>), 38.5 (C), 44.9 (CH<sub>2</sub>), 82.9 (C), 117.4 (CN), 156.3 (C).

**IR** (neat): /cm<sup>-1</sup> = 3408, 3359, 3226, 3128, 2920, 2904, 2864, 1716, 1450, 1388, 1379, 1338, 1327, 1228, 1207, 1194, 1144, 1120, 1082, 1005, 962, 904, 866, 810, 758, 714, 661, 648, 631, 519, 503, 490, 447.

**HRMS**: *m/z* = 247.1442 ([M+H]<sup>+</sup>; calculated for C<sub>14</sub>H<sub>19</sub>N<sub>2</sub>O<sub>2</sub><sup>+</sup>, *m/z* = 247.1441).

### 2.3.6.2 Compound 4f2 (two isomers)

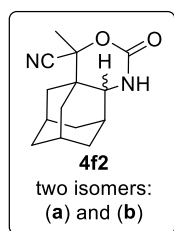

#### Compound 4f2a (first isomer)

Compound **4f2a** was isolated by silica gel column chromatography eluting with Et<sub>2</sub>O : *n*-hexane 1:1. Product **4f2a** was obtained as a white crystalline solid (64mg) in a 39% yield.

**m.p.** (cryst. from CHCl<sub>3</sub>): 205.8 °C.

**R<sub>f</sub>** (silica gel; Et<sub>2</sub>O : *n*-hexane 1:1): 0.8.

**<sup>1</sup>H NMR** (400 MHz, CDCl<sub>3</sub>): δ/ppm = 1.51-1.56 (m, 1H), 1.62 (s, 3H), 1.66-1.70 (m, 2H), 1.73-1.76 (m, 2H), 1.78-1.83 (m, 3H), 1.88-1.93 (m, 2H), 1.97-2.00 (m, 1H), 2.07-2.11 (m, 1H), 2.15-2.18 (m, 1H), 3.815 (d, *J* = 3.2 Hz, 1H), 5.89 (bs, 1H).

**<sup>13</sup>C NMR** (101 MHz, CDCl<sub>3</sub>): δ/ppm = 19.8 (CH<sub>3</sub>), 26.7 (CH), 28.1 (CH), 28.7 (CH<sub>2</sub>), 29.2 (CH<sub>2</sub>), 31.9 (CH), 35.0 (CH<sub>2</sub>), 35.3 (C), 36.2 (CH<sub>2</sub>), 36.7 (CH<sub>2</sub>), 56.8 (CH), 80.3 (C), 118.0 (CN), 151.3 (C).

**IR** (neat):  $\tilde{\nu}$  /cm<sup>-1</sup> = 3400, 3230, 3128, 2904, 2862, 1786, 1716, 1450, 1388, 1379, 1338, 1327, 1281, 1265, 1207, 1194, 1144, 1120, 1076, 1005, 980, 904, 810, 758, 735, 714, 661, 648, 594, 519, 501, 490, 449.

**HRMS**: *m/z* = 247.1445 ([M+H]<sup>+</sup>; calculated for C<sub>14</sub>H<sub>19</sub>N<sub>2</sub>O<sub>2</sub><sup>+</sup>, *m/z* = 247.1441).

#### Compound 4f2b (second isomer)

Compound **4f2b** was isolated by silica gel column chromatography eluting with Et<sub>2</sub>O : *n*-hexane 1:1. Product **4f2b** was obtained as a white crystalline solid (66mg) in a 41% yield.

**m.p.** (cryst. from CHCl<sub>3</sub>): 206.5 °C.

**R<sub>f</sub>** (silica gel; Et<sub>2</sub>O : *n*-hexane 1:1): 0.55.

**<sup>1</sup>H NMR** (400 MHz, CDCl<sub>3</sub>): δ/ppm = 1.51-1.56 (m, 1H), 1.62 (s, 3H), 1.66-1.70 (m, 2H), 1.73-1.76 (m, 2H), 1.78-1.83 (m, 3H), 1.87-1.94 (m, 2H), 1.97-2.00 (m, 1H), 2.07-2.11 (m, 1H), 2.15-2.18 (m, 1H), 3.805 (d, *J* = 3.2 Hz, 1H), 6.02 (bs, 1H).

**<sup>13</sup>C NMR** (101 MHz, CDCl<sub>3</sub>): δ/ppm = 19.8 (CH<sub>3</sub>), 26.9 (CH), 28.0 (CH), 28.7 (CH<sub>2</sub>), 29.2 (CH<sub>2</sub>), 31.7 (CH), 35.0 (CH<sub>2</sub>), 35.2 (C), 36.2 (CH<sub>2</sub>), 36.8 (CH<sub>2</sub>), 56.7 (CH), 80.3 (C), 118.0 (CN), 151.8 (C).

**IR** (neat):  $\tilde{\nu}$  /cm<sup>-1</sup> = 3242, 3130, 2906, 1714, 1390, 1076, 1000, 760, 715.

**HRMS**: *m/z* = 247.1445 ([M+H]<sup>+</sup>; calculated for C<sub>14</sub>H<sub>19</sub>N<sub>2</sub>O<sub>2</sub><sup>+</sup>, *m/z* = 247.1441).

### 3.3.7 Compound 4g

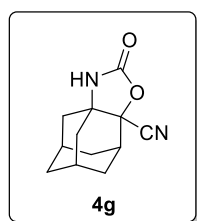

Carbonazidate **3g** (200 mg, 0.92 mmol) was dissolved in anhydrous 1,2-DCE (5 mL) and the solution was heated in a sealed tube at 130 °C overnight. After that the reaction mixture was cooled down to room temperature and concentrated *in vacuo*. The crude product was filtered off, washed with hexane and dried *in vacuo*. The compound **4g** was obtained as a white crystalline solid (204 mg) in a 83% yield.

**m.p.** (cryst. from CHCl<sub>3</sub>): 179.7 °C.

**R<sub>f</sub>** (silica gel; DCM : EtOAc 4:1): 0.6.

**<sup>1</sup>H NMR** (400 MHz, CDCl<sub>3</sub>): δ/ppm = 1.64-1.67 (m, 1H), 1.73-1.82 (m, 2H), 1.86-1.98 (m, 4H), 2.04-2.10 (m, 2H), 2.26-2.37 (m, 3H), 2.63-2.65 (m, 1H), 6.03 (bs, 1H)

**<sup>13</sup>C NMR** (101 MHz, CDCl<sub>3</sub>): δ/ppm = 27.5 (CH), 28.8 (CH), 29.5 (CH<sub>2</sub>), 33.7 (CH), 35.5 (CH<sub>2</sub>), 35.6 (CH<sub>2</sub>), 37.2 (CH<sub>2</sub>), 40.2 (CH<sub>2</sub>), 58.9 (C), 85.6 (C), 118.6 (CN), 158.3 (C).

**IR** (neat):  $\tilde{\nu}$  /cm<sup>-1</sup> = 3292, 3182, 2929, 2862, 2692, 2239, 1836, 1776, 1755, 1537, 1462, 1408, 1302, 1265, 1149, 1134, 1097, 1080, 1070, 1045, 1020, 970, 947, 930, 918, 891, 868, 841, 800, 769, 721, 663, 633, 582, 557, 546, 523, 471, 461, 436.

**HRMS**: *m/z* = 241.0948 ([M+Na]<sup>+</sup>; calculated for C<sub>12</sub>H<sub>14</sub>N<sub>2</sub>NaO<sub>2</sub><sup>+</sup>, *m/z* = 241.0947).

### 3.3.8 Compound 4h

Carbonazidate **3h** (200 mg, 0.67 mmol) was dissolved in anhydrous 1,2-DCE (5 mL) and the solution was heated in a sealed tube at 130 °C overnight. After that the reaction mixture was cooled down to room temperature and concentrated *in vacuo*. The crude product was obtained as a white crystalline solid (156 mg) in a 86% yield. The ratio between compounds **3h1** and **3h2** was established from crude <sup>1</sup>H NMR to be 1:1.3 respectively.

### 2.3.8.1 Compound 4h1

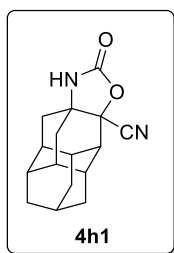

Compound **4h1** was isolated by silica gel column chromatography eluting with DCM : EtOAc 4:1. Product **4h1** was obtained as a white crystalline solid (58 mg) in a 32% yield.

**m.p.** (cryst. from CHCl<sub>3</sub>): 175.6 °C.

**R<sub>f</sub>** (silica gel; DCM : EtOAc 4:1): 0.7.

**<sup>1</sup>H NMR** (400 MHz, CDCl<sub>3</sub>): δ/ppm = 1.63 (dt, J = 14.3, 2.6 Hz, 1H), 1.67-1.69 (m, 2H), 1.78 – 1.71 (m, 4H), 1.79-1.82 (m, 2H), 1.95 – 1.86 (m, 2H), 1.98 (q, J = 2.9 Hz, 1H), 2.05 – 2.00 (m, 1H), 2.16 – 2.12 (m, 2H), 2.33-2.35 (m, 1H), 2.38-2.39 (m, 1H), 6.53 (s, 1H).

**<sup>13</sup>C NMR** (101 MHz, CDCl<sub>3</sub>): δ/ppm = 27.4 (CH), 28.9 (CH<sub>2</sub>), 33.4 (CH), 34.3 (CH<sub>2</sub>), 34.7 (CH), 35.1 (CH), 36.1 (CH<sub>2</sub>), 36.2 (CH<sub>2</sub>), 37.7 (CH), 41.6 (CH<sub>2</sub>), 42.7 (CH), 43.3 (CH), 52.2 (C), 80.1 (C), 117.4 (CN), 152.8 (C).

**IR** (neat):  $\tilde{\nu}$  /cm<sup>-1</sup> = 3386, 3213, 3184, 3116, 2925, 2898, 2852, 1716, 1466, 1444, 1379, 1358, 1317, 1234, 1178, 1165, 1126, 1024, 995, 895, 872, 787, 756, 725, 650, 621, 525, 498, 467, 428.

**HRMS**: m/z = 293.1258 ([M+Na]; calculated for C<sub>16</sub>H<sub>18</sub>N<sub>2</sub>NaO<sub>2</sub>+ m/z = 293.1260).

### 2.3.8.2 Compound 4h2

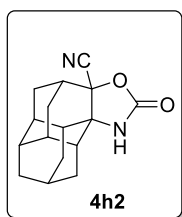

Compound **4h2** was isolated by silica gel column chromatography eluting with DCM : EtOAc 4:1. Product **4h2** was obtained as a white crystalline solid (80 mg) in a 44% yield.

**m.p.** (cryst. from CHCl<sub>3</sub>): 211.3 °C.

**R<sub>f</sub>** (silica gel; DCM : EtOAc 4:1): 0.6.

**<sup>1</sup>H NMR** (400 MHz, CDCl<sub>3</sub>): δ/ppm = 1.71-1.74 (m, 2H), 1.75-1.81 (m, 5H), 1.83-1.86 (m, 2H), 1.88-1.93 (m, 3H), 1.99 (dq, J = 13.4, 2.8 Hz, 1H), 2.04-2.08 (m, 1H), 2.36 (dq, J = 14.3, 3.1 Hz, 1H), 2.50 – 2.44 (m, 1H), 2.62 – 2.56 (m, 1H), 6.87 (s, 1H).

**<sup>13</sup>C NMR** (101 MHz, CDCl<sub>3</sub>): δ/ppm = 24.8 (CH), 30.94 (CH<sub>2</sub>), 32.4 (CH<sub>2</sub>), 32.4 (CH), 33.2 (CH<sub>2</sub>), 35.7 (CH), 35.9 (CH<sub>2</sub>), 36.5 (CH<sub>2</sub>), 36.7 (CH), 37.6 (CH), 37.7 (CH), 39.9 (CH), 62.5 (C), 86.7 (C), 118.5 (CN), 158.5 (C).

**IR** (neat):  $\tilde{\nu}$  /cm<sup>-1</sup> = 3485, 3253, 3147, 3020, 2931, 2900, 2777, 2752, 2241, 1855, 1766, 1552, 1460, 1448, 1406, 1346, 1306, 1279, 1261, 1124, 1111, 1057, 1043, 985, 957, 930, 912, 858, 823, 806, 777, 754, 723, 652, 617, 582, 463, 424.

**HRMS**: m/z = 293.1260 ([M+Na]; calculated for C<sub>16</sub>H<sub>18</sub>N<sub>2</sub>NaO<sub>2</sub> m/z = 293.1260).

### 3.4 Preparation and characterisation of compounds 5-13.

#### 3.4.1 Compound 5

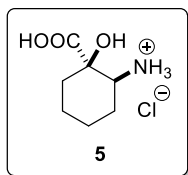

**<sup>1</sup>H NMR** (400 MHz, CDCl<sub>3</sub>): δ/ppm = 1.20-1.82 (m, 8H), 3.53-3.56 (m, 1H).

**<sup>13</sup>C NMR** (101 MHz, CDCl<sub>3</sub>): δ/ppm = 18.7 (CH<sub>2</sub>), 22.8 (2CH<sub>2</sub>), 25.5 (CH<sub>2</sub>), 34.1 (CH<sub>2</sub>), 53.1 (CH), 73.9 (C), 176.9 (COOH).

Compound **4h1** (200 mg, 0.75 mmol) was dissolved in concentrated HCl and heated at 90 °C for 3 days. After that the reaction mixture was cooled down to room temperature and aqueous HCl was directly evaporated *in vacuo*. Compound **5** was obtained as a white crystalline solid (181 mg) in a 77% yield.

#### 3.4.2 Compound 6

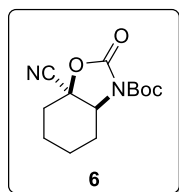

**<sup>1</sup>H NMR** (400 MHz, CDCl<sub>3</sub>): δ/ppm = 1.32-1.49 (m, 3H), 1.54 (s, 9H), 1.70-1.77 (m, 2H), 1.97-2.06 (m, 1H), 2.34-2.42 (m, 1H), 2.46-2.52 (m, 1H), 4.33-4.37 (m, 1H).

**<sup>13</sup>C NMR** (101 MHz, CDCl<sub>3</sub>): δ/ppm = 18.6 (CH<sub>2</sub>), 19.5 (CH<sub>2</sub>), 27.4 (CH<sub>2</sub>), 28.0 (3CH<sub>3</sub>), 31.3 (CH<sub>2</sub>), 58.4 (CH), 59.3 (CH), 72.5 (C), 82.1 (C), 118.4 (CN), 148.4 (C), 149.5 (C).

Compound **6** was prepared in one step from compound **4a1** according to the procedure described in Katsuo, S.; Kazuhiro, M.; Hideaki, W.; Yukio, M. *Chem. Pharm. Bull.* **1996**, *44*, 1823–1830. Product **6** was purified by silica gel column eluting with Et<sub>2</sub>O : Hexane 1:1 and isolated in a 77% yield.

#### 3.4.3 Compound 7

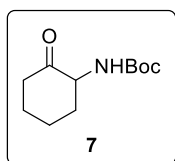

**<sup>1</sup>H NMR** (400 MHz, CDCl<sub>3</sub>): δ/ppm = 1.35-1.39 (m, 1H), 1.43 (s, 9H), 1.59-1.66 (m, 1H), 1.70-1.79 (m, 1H), 1.85-1.89 (m, 1H), 2.08-2.14 (m, 1H), 2.32-2.41 (m, 1H), 2.48-2.61 (m, 2H), 4.19-4.25 (m, 1H), 5.48 (bs, 1H).

**<sup>13</sup>C NMR** (101 MHz, CDCl<sub>3</sub>): δ/ppm = 24.3 (CH<sub>2</sub>), 28.1 (2CH<sub>2</sub>), 28.5 (3CH<sub>3</sub>), 36.1 (CH<sub>2</sub>), 41.2 (CH<sub>2</sub>), 59.3 (CH), 79.7 (C), 155.1 (C), 207.8 (C).

Compound **6** (200 mg, 0.75 mmol) was dissolved in 2M aqueous KOH (2 mL)/EtOH (2 mL) solution, heated to 40 °C and left stirring overnight. After that the reaction mixture was cooled down to room temperature and extracted with EtOAc (3 × 4 mL). The combined organic phase was dried over MgSO<sub>4</sub> and concentrated *in vacuo*. Compound **7** was obtained as a white crystalline solid (134 mg) in a 84% yield.

### 3.4.4 Compound 8

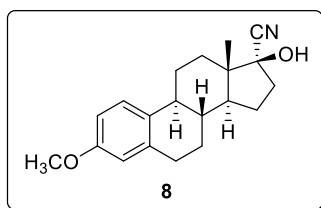

**$^1\text{H}$  NMR** (600 MHz,  $\text{CDCl}_3$ ):  $\delta/\text{ppm}$  = 0.93 (s, 3H), 1.40-1.57 (m, 4H), 1.65-1.72 (m, 1H), 1.84-1.94 (m, 4H), 1.99-2.07 (m, 1H), 2.26-2.32 (m, 1H), 2.40-2.46 (m, 1H), 2.51-2.61 (m, 2H), 2.85-2.87 (m, 2H), 3.78 (s, 3H), 6.64-6.65 (m, 1H), 6.71-6.74 (m, 1H), 7.19-7.22 (m, 1H).

**$^{13}\text{C}$  NMR** (101 MHz,  $\text{CDCl}_3$ ):  $\delta/\text{ppm}$  = 12.34 ( $\text{CH}_3$ ), 23.05 ( $\text{CH}_2$ ), 26.26 ( $\text{CH}_2$ ), 27.25 ( $\text{CH}_2$ ), 29.78 ( $\text{CH}_2$ ), 33.48 ( $\text{CH}_2$ ), 37.40 (CH), 39.32 ( $\text{CH}_2$ ), 43.31 (CH), 47.58 (C), 49.82 (CH), 55.37 ( $\text{OCH}_3$ ), 81.14 (C), 11.74 (CH), 114.00 (CH), 122.23 (CN), 126.48 (CH), 132.03 (C), 137.89 (C), 157.71 (C).

Compound **8** was prepared in one step from Estrone methyl ester according to the procedure described in de Castro, Sonia; et al. *Chemistry - A European Journal*. **2008**, 14(31), 9620-9632. Product **8** was purified silica gel column chromatography eluting with  $\text{CH}_2\text{Cl}_2$  : EtOAc 2:1 and isolated in a 71% yield.

### 3.4.5 Compound 9

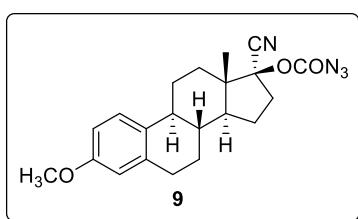

Starting material **8** (200 mg, 0.64 mmol) was dissolved in anhydrous pyridine (3 mL), the solution was cooled to  $-10^\circ\text{C}$  and  $\text{NaN}_3$  (83.5 mg, 1.28 mmol) was carefully added to the solution. Triphosgene (954 mg, 0.32 mmol) was dissolved in anhydrous DCM (2 mL) at  $0^\circ\text{C}$  and added dropwise to the reaction mixture at  $-10^\circ\text{C}$ . The reaction mixture was stirred for 15 min. at  $-10^\circ\text{C}$ . After 10 minutes the reaction mixture was

allowed to warm up to room temperature and stirred for 1 h. After that the reaction mixture was heated at  $50^\circ\text{C}$  and stirred for an additional 5 hours. The reaction was quenched with water and the product was extracted with  $\text{Et}_2\text{O}$ . The combined organic fractions were dried over anhydrous  $\text{MgSO}_4$ , concentrated *in vacuo* and the product was purified by silica gel column chromatography eluting with hexane:  $\text{Et}_2\text{O}$  2:1. Compound **2a** was obtained as a white solid (225 mg) in a 92% yield.

**m.p.** (cryst. from  $\text{CHCl}_3$ ):  $58.2^\circ\text{C}$ .

**R<sub>f</sub>** (silica gel; Hexane :  $\text{Et}_2\text{O}$  2:1): 0.65.

**$^1\text{H}$  NMR** (400 MHz,  $\text{CDCl}_3$ ):  $\delta/\text{ppm}$  = 0.97 (s, 3H), 1.40-1.61 (m, 4H), 1.71-1.79 (m, 1H), 1.87-2.03 (m, 4H), 2.10-2.18 (m, 1H), 2.28-2.35 (m, 1H), 2.41-2.47 (m, 1H), 2.87-2.99 (m, 3H), 3.79 (s, 3H), 6.65 (d,  $J$  = 2.8 Hz, 1H), 6.74 (dd,  $J$  = 8.6, 2.8 Hz, 1H), 7.21 (dd, 8.6, 1.0 Hz, 1H).

**$^{13}\text{C}$  NMR** (101 MHz,  $\text{CDCl}_3$ ):  $\delta/\text{ppm}$  = 12.9 ( $\text{CH}_3$ ), 23.2 ( $\text{CH}_2$ ), 26.0 ( $\text{CH}_2$ ), 27.1 ( $\text{CH}_2$ ), 29.6 ( $\text{CH}_2$ ), 33.7 ( $\text{CH}_2$ ), 35.6 ( $\text{CH}_2$ ), 38.9 (CH), 43.1 (CH), 48.4 (C), 48.5 (CH), 55.2 (CH), 85.7 (C), 111.7 (CN), 126.4 (CH), 131.5 (CH), 137.6 (CH), 156.2 (C), 157.7 (C).

**IR** (neat):  $\tilde{\nu}/\text{cm}^{-1}$  = 3057, 2991, 2935, 2870, 2175, 2133, 1739, 1608, 1576, 1500, 1456, 1387, 1250, 1059, 1034, 1016, 912, 885, 868, 783, 739, 681, 648, 598, 557, 445.

**HRMS:**  $m/z = 403.1739$  ( $[M+Na]$ ; calculated for  $C_{21}H_{24}N_4NaO_3$ ;  $m/z = 403.1741$ ).

### 3.4.6 Compound 10

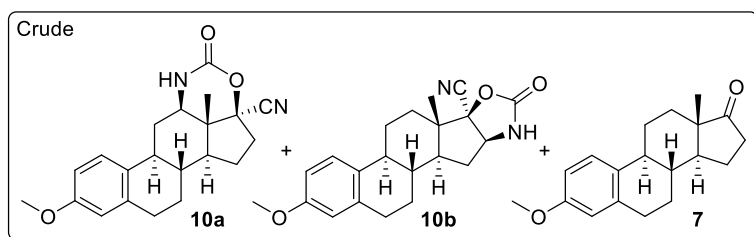

Carbonazidate **9** (200 mg, 0.53 mmol) was dissolved in anhydrous 1,2-DCE (5 mL) and the solution was heated in a sealed tube at 130 °C overnight. After that the reaction mixture was cooled down to room

temperature and concentrated *in vacuo*. The crude product was obtained as a pale-yellow oil. The crude mixture of five-membered **10a** and six-membered **10b** carbamates (1:1) was carried to the next step without further purification.

### 3.4.7 Compound 11

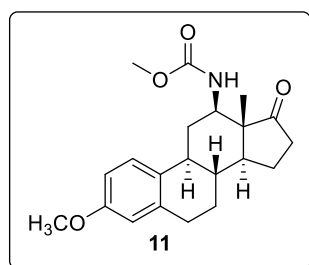

The crude mixture of carbamates **10** (60 mg) was dissolved in anhydrous methanol 15 mL and 120 mg of  $K_2CO_3$  was added. The mixture was heated for 2 hours at 100 °C in seal tube. Then the mixture was cooled to room temperature, evaporated and directly transferred to a silica gel column for separation using  $CHCl_3$  : *i*PrOH :  $Et_3N$  10:1:0.2. Product **11** was obtained as a light-yellow oil (26 mg) in a 41% yield.

**R<sub>f</sub>** (silica gel;  $CHCl_3$  : *i*PrOH :  $Et_3N$  10:1:0.2) 0.25

**<sup>1</sup>H NMR** (400 MHz,  $CDCl_3$ ):  $\delta$ /ppm = 0.92 (s, 3H), 1.38-1.55 (m, 3H), 1.62-1.69 (m, 2H), 1.98-2.24 (m, 3H), 2.38-2.50 (m, 2H), 2.81-2.92 (m, 3H), 3.85-3.91 (m, 1H), 5.12 (bs, 1H), 6.65 (d,  $J = 2.8$  Hz, 1H), 6.73 (dd,  $J = 8.6, 2.9$  Hz, 1H), 7.19 (d,  $J = 6.7$  Hz, 1H).

**<sup>13</sup>C NMR** (101 MHz,  $CDCl_3$ ):  $\delta$ /ppm = 9.64 ( $CH_3$ ), 21.2 ( $CH_2$ ), 26.3 ( $CH_2$ ), 29.6 ( $CH_2$ ), 33.3 ( $CH_2$ ), 36.3 ( $CH_2$ ), 37.7 (CH), 42.7 (CH), 49.4 (C), 50.4 ( $CH_3$ ), 52.2 (CH), 53.9 ( $CH_3$ ), 55.3 (CH), 111.7 (CH), 114.1 (CH), 126.4 (CH), 131.1 (C), 137.6 (C), 157.1 (C), 157.9 (C), 218.8 (C).

**IR** (neat):  $\tilde{\nu}/cm^{-1} = 3330, 2929, 2885, 2837, 1736, 1701, 1608, 1518, 1498, 1464, 1377, 1344, 1254, 1236, 1188, 1153, 1049, 1039, 970, 939, 908, 818, 750, 712, 665, 598, 501, 455, 436$ .

**HRMS:**  $m/z = 380.1831$  ( $[M+Na]$ ; calculated for  $C_{21}H_{27}NNaO_4^+$ ,  $m/z = 380.1832$ ).

### 3.4.8 Compound 12

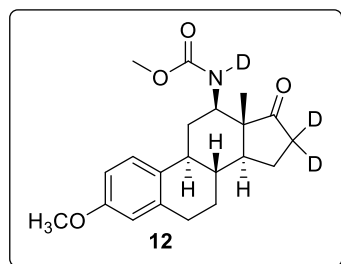

A vial was charged with carbamate **11** (70 mg, 0.2 mmol) and a magnetic stirbar. A mixture of  $D_2O$  (1 ml) and  $CD_3OD$  (2 ml) was added followed by solid NaOH (80 mg, 2 mmol). The vial was sealed and the reaction mixture was stirred at 40 °C for 16 h. After 16 h a sample was taken directly from the deuterated reaction mixture for NMR measurements.

**$^1\text{H}$  NMR** (400 MHz,  $\text{CD}_3\text{OD}$ )  $\delta/\text{ppm}$  = 0.9 (s, 3H), 1.3 – 1.5 (m, 3H), 1.6 – 1.7 (m, 2H), 2.0 – 2.1 (m, 2H), 2.3 – 2.5 (m, 2H), 2.8 – 2.9 (m, 2H), 3.7 (s, 3H), 3.7 (s, 3H), 3.9 (dd,  $J$  = 12.0, 4.1 Hz, 1H), 6.6 (d,  $J$  = 2.7 Hz, 1H), 6.7 (dd,  $J$  = 8.5, 2.8 Hz, 1H), 7.1 (d,  $J$  = 8.6 Hz, 1H).

**$^{13}\text{C}$  NMR** (101 MHz,  $\text{CD}_3\text{OD}$ )  $\delta/\text{ppm}$  = 9.7, 21.7, 27.1, 30.4, 34.8, 38.7, 44.0, 49.2, 51.2, 51.5, 52.8, 54.1, 55.8, 112.6, 114.8, 127.1, 132.5, 138.9, 158.8, 159.3, 222.6.

### 3.4.9 Compound 13

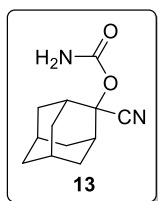

Cyanohydrin **2g** (286 mg, 1.62 mmol) was dissolved in anhydrous DCM and cooled to 0 °C. Trichloroacetylisocyanate (0.21 mL, 1.78 mmol) was added dropwise to the reaction mixture and stirred for 2h at 24 °C. After 2h the solvent was removed *in vacuo* and 1.5 mL MeOH was added together with 1.5 mL of saturated aqueous  $\text{K}_2\text{CO}_3$ . The reaction mixture was heated to 50 °C and stirred for 24h. The MeOH was evaporated *in vacuo* and the product precipitated from the water solution. The product was filtered off, washed with water and  $\text{Et}_2\text{O}$ . The compound **13** (280 mg) was obtained as colorless solid in a 78 % yield.

**m.p.** (cryst. from DCM): over 200 °C.

**$^1\text{H}$  NMR** (400 MHz,  $\text{CDCl}_3$ ):  $\delta/\text{ppm}$  = 5.73-5.96 (m, 10H), 6.16-6.27 (m, 4H), 8.83 (bs, 2H).

**$^{13}\text{C}$  NMR** (101 MHz,  $\text{CD}_3\text{OD}$ ):  $\delta/\text{ppm}$  = 27.1 (CH), 28.1 (CH), 33.7 ( $\text{CH}_2$ ), 35.6 ( $\text{CH}_2$ ), 36.4 (CH), 38.8 ( $\text{CH}_2$ ), 90.6 (C), 168.5 (CN), 187.2 (C).

**IR** (neat):  $\tilde{\nu}/\text{cm}^{-1}$  = 3359, 3126, 3020, 2945, 2902, 2889, 2860, 2846, 2488, 2254, 1741, 1668, 1597, 1552, 1496, 1456, 1392, 1306, 1282, 1242, 1215, 1122, 1092, 1068, 1009, 980, 939, 930, 862, 787, 729, 683, 661, 627, 602, 521, 505.476, 445.

**HRMS**:  $m/z$  = 221.1285 ( $[\text{M}+\text{H}]^+$ ; calculated for  $\text{C}_{12}\text{H}_{17}\text{N}_2\text{O}_2^+$ ,  $m/z$  = 221.1285).

## 3.5 Additional experiments

### 3.5.1 Dirhodium acetate catalysed amination reaction of 13

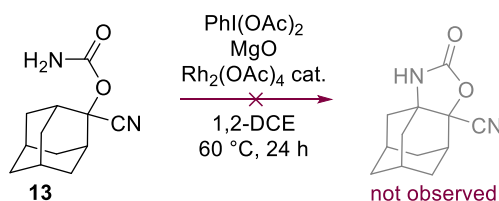

Compound **13** (30 mg, 0.14 mmol),  $\text{PhI}(\text{OAc})_2$  (59 mg, 0.18 mmol),  $\text{MgO}$  (13 mg) and  $\text{Rh}_2(\text{OAc})_4$  (2 mg, 0.004 mmol) were dissolved in anhydrous 1,2-dichloroethane and the reaction was stirred at 60 °C for 24h. The reaction turned into red/brown color indicating the deactivation of the dirhodium catalyst. No product formation was observed with complete retrieval of the starting material **13**.

### 3.5.2 Cobalt catalysed amination reaction of **3h**.

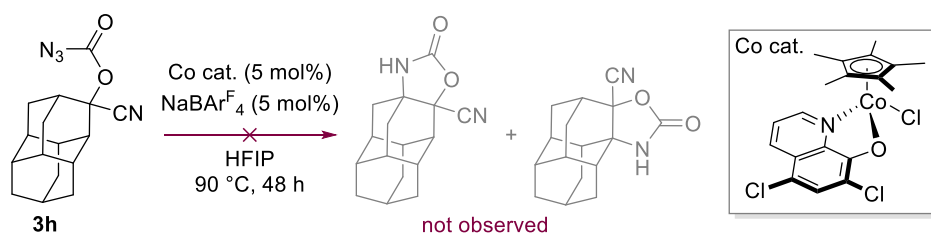

A vial with a septum cap was charged with the Co-catalyst (7 mg, 5 mol%), NaBARF<sub>4</sub> (15 mg, 5 mol%) and HFIP (2 ml). The mixture was stirred at room temperature for 1 minute. Next, azide **3h** (100 mg, 0.34 mmol) was added, the vial tightly sealed and the reaction mixture was heated to 90 °C and vigorously stirred for 48 h. After completion the crude reaction mixture was filtered through a pad of silica gel eluting with EtOAc. The filtrate was concentrated under vacuo and crude <sup>1</sup>H NMR was measured. Formation of the desired product was not observed. The procedure was adapted from: Lee, J.; Lee, J.; Jung, H.; Kim, D.; Park, J.; Chang, S. *J. Am. Chem. Soc.* **2020**, 142, 12324-12332.

### 3.5.3 UV initiated amination reaction of **3h**

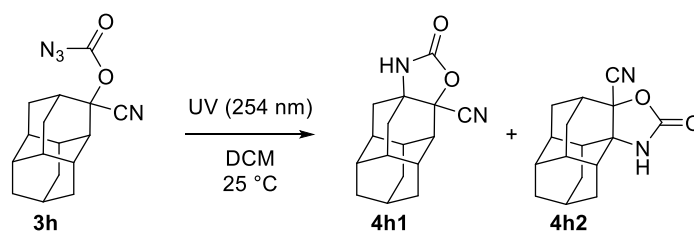

A quartz cuvette was charged with azide **3h** (20 mg, 0.067 mmol) and a stirbar, flushed with argon and anhydrous DCM (1 ml) was added. The cuvette was sealed with a septum connected to a argon balloon. The mixture was stirred and irradiated with a mercury lamp (254 nm). Progress of the reaction was monitored by TLC. Upon completion (3 h), DCM was evaporated under vacuo and the crude <sup>1</sup>H NMR was measured. The ratio of **4h1** and **4h2** was established to be 1:1.3 respectively, which is identical to the ratio of the thermal amination reaction.

## 4. NMR spectra of compounds 2-12

### Compound 2

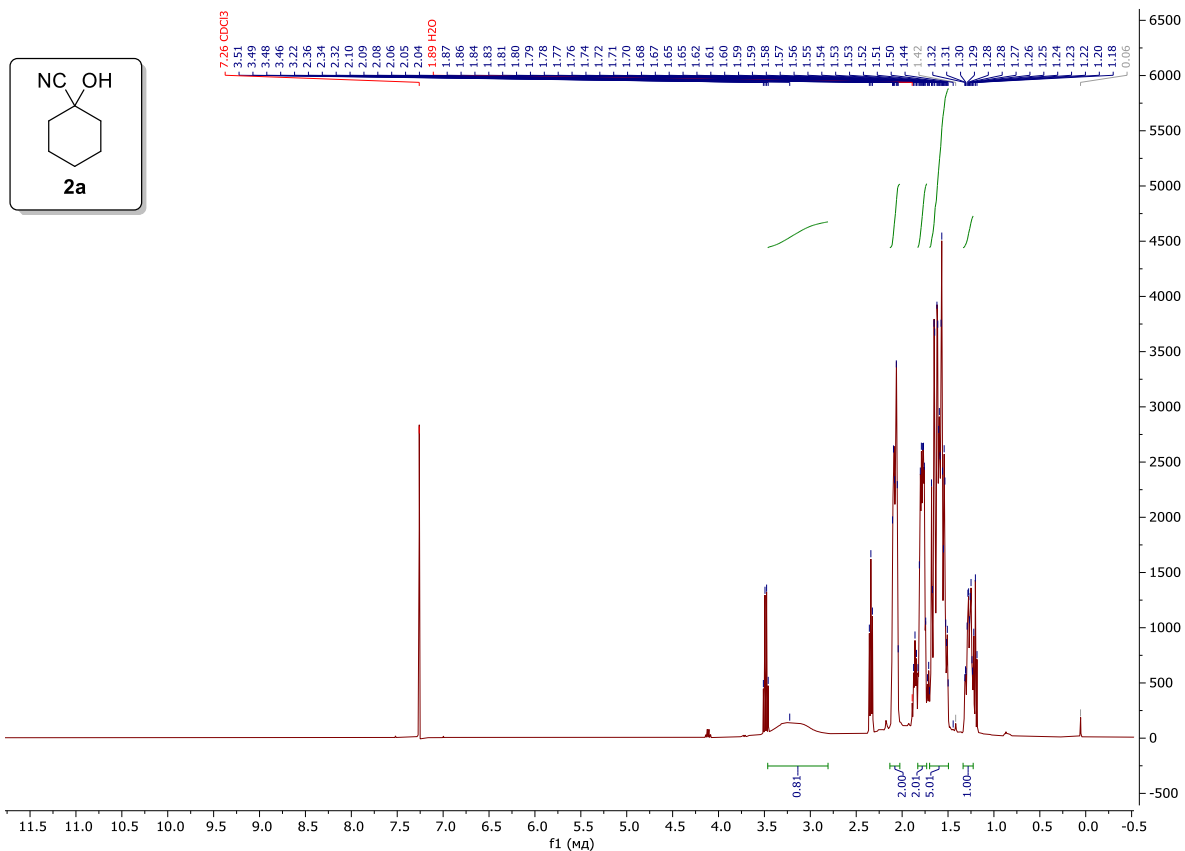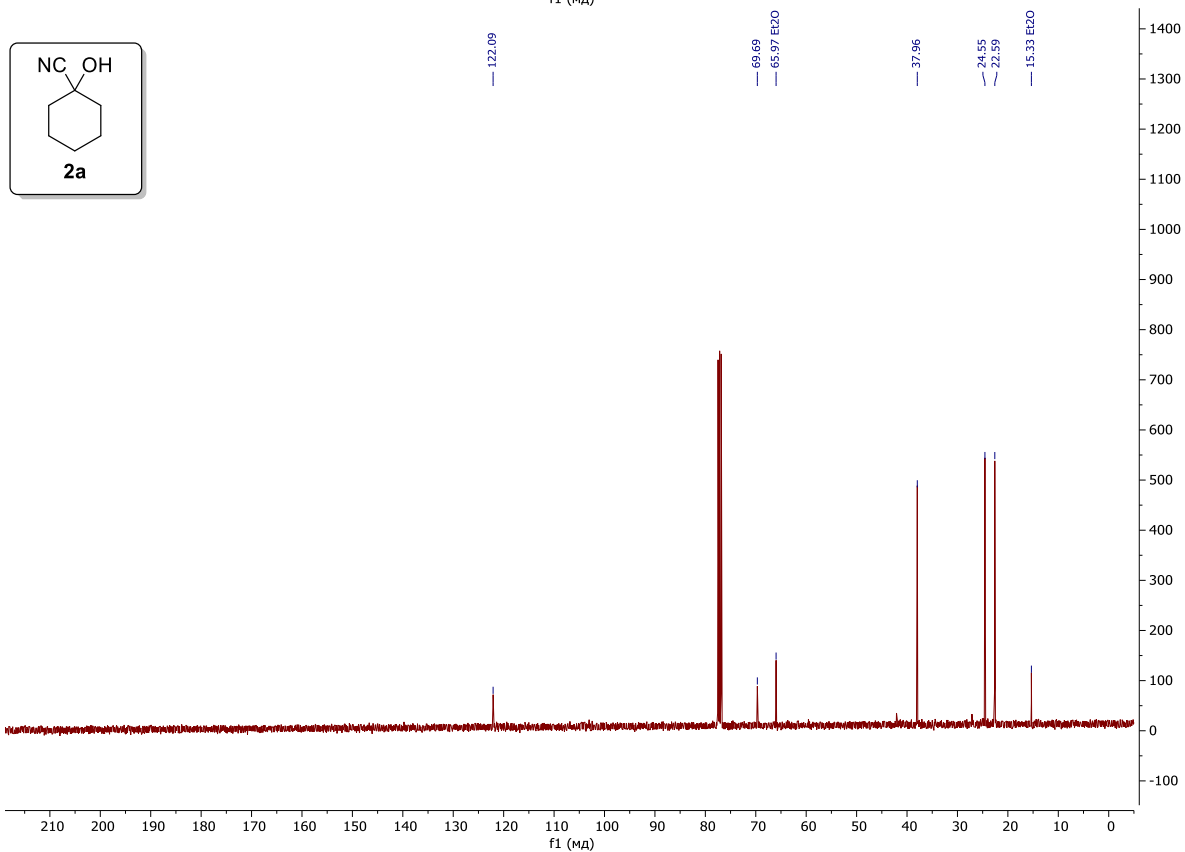

# Compound 2b

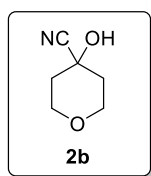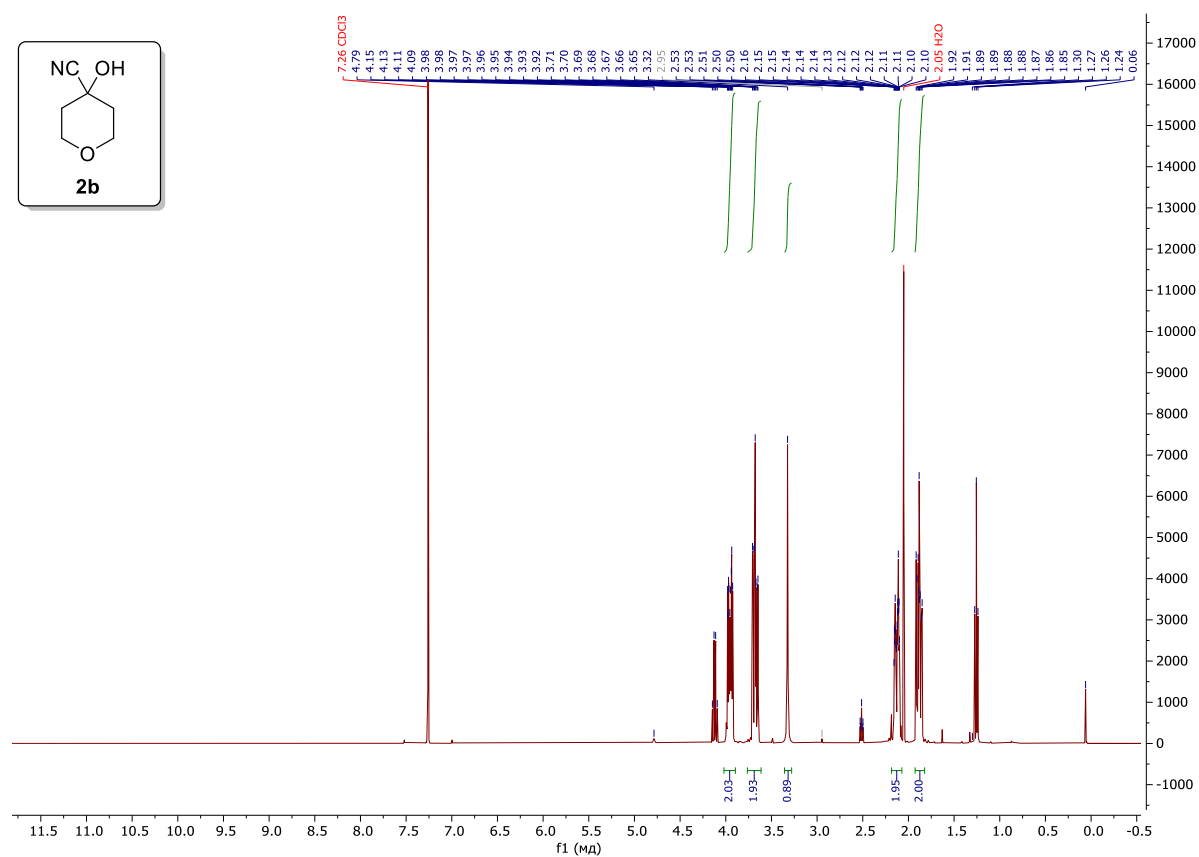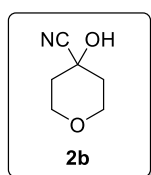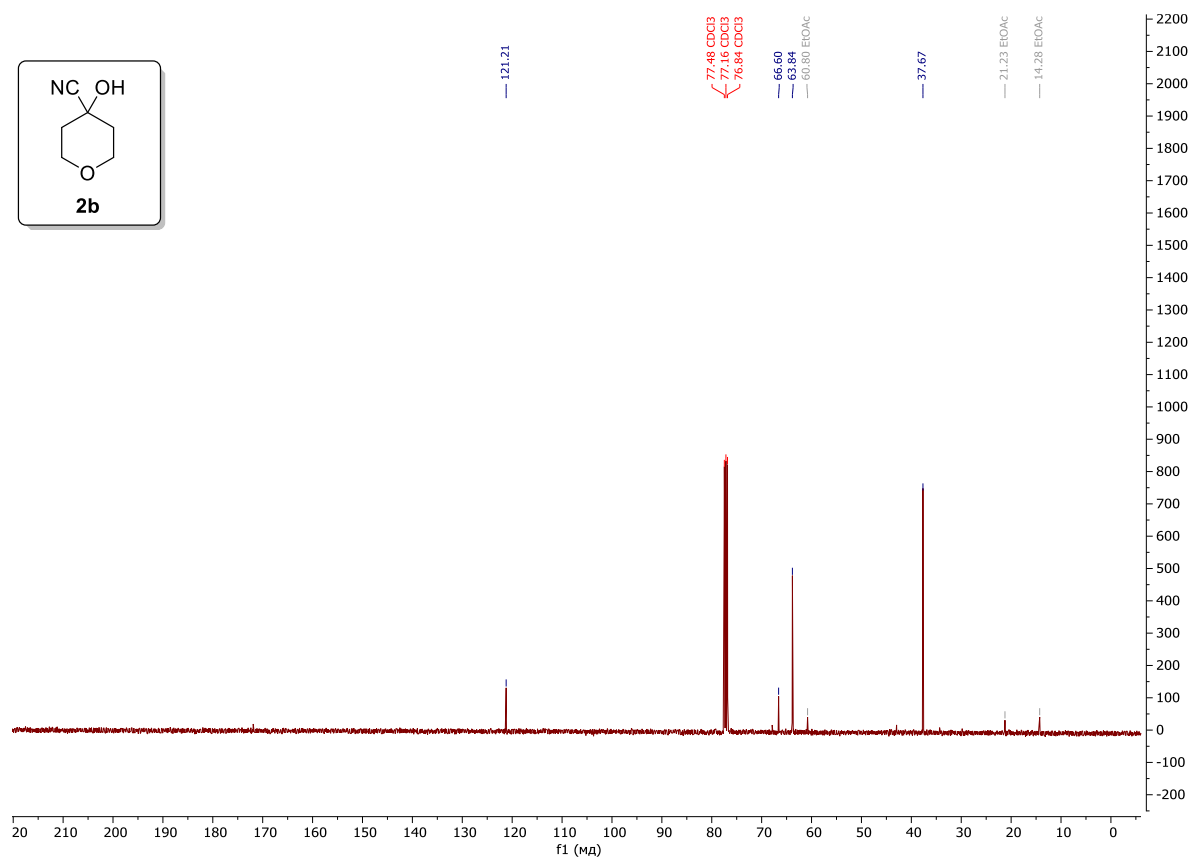

**<sup>1</sup>H NMR (400 MHz, CDCl<sub>3</sub>)**

Chemical structure of **2c** (1-cyano-1-cyclohexanol): N#CC1(O)CCCCC1

Peak list (ppm): 3.78, 2.92, 2.51, 2.48, 2.49, 2.18, 2.16, 2.15, 2.13, 1.96, 1.95, 1.91, 1.89, 1.76, 1.74, 1.72, 1.69, 1.67, 1.65, 1.63, 1.61, 1.60, 1.58, 1.56, 1.55, 1.54, 1.56 H<sub>2</sub>O, 1.54 H<sub>2</sub>O, 0.12.

Integration values: 0.84, 0.72, 2.03, 2.00, 7.27.

**<sup>13</sup>C NMR (100 MHz, CDCl<sub>3</sub>)**

Chemical structure of **2c** (1-cyano-1-cyclohexanol): N#CC1(O)CCCCC1

Peak list (ppm): 123.05, 77.48 CDCl<sub>3</sub>, 77.16 CDCl<sub>3</sub>, 76.84 CDCl<sub>3</sub>, 72.52, 41.12, 27.77, 21.58.

### Compound 2d

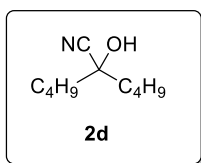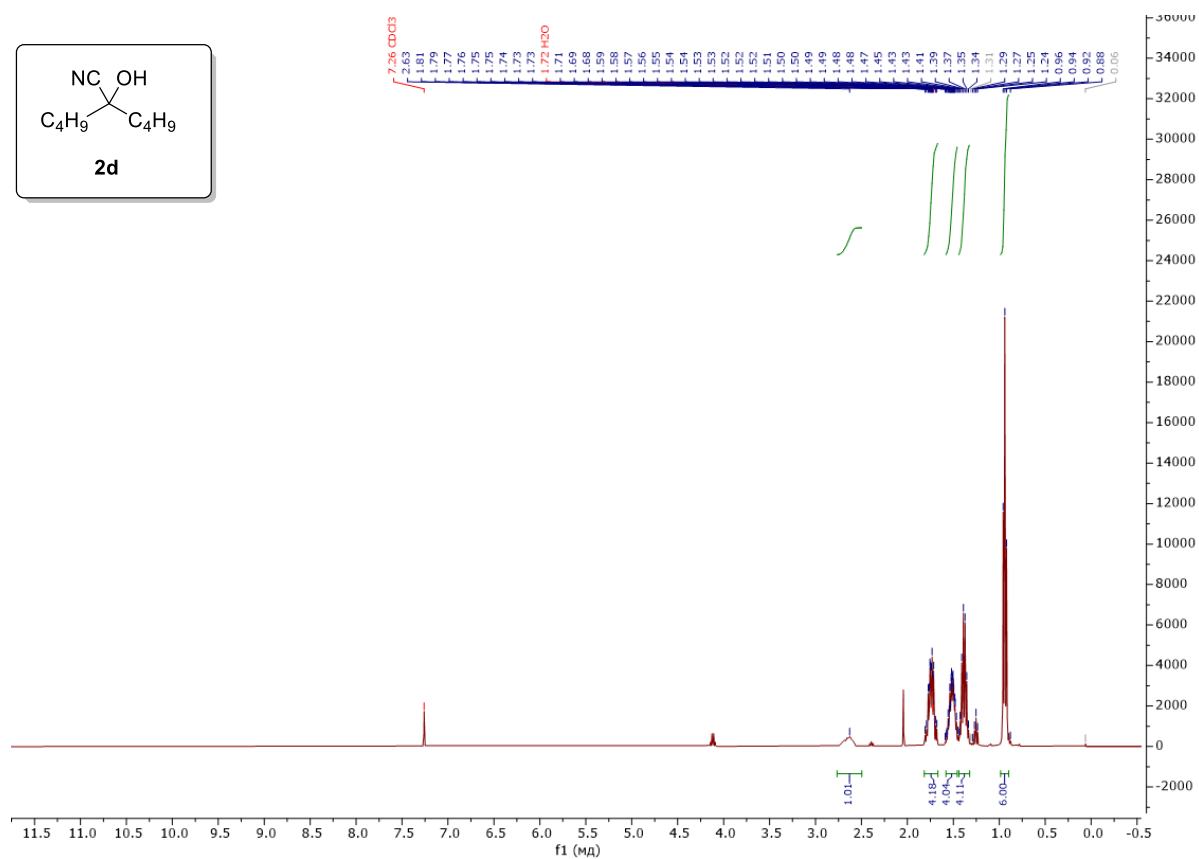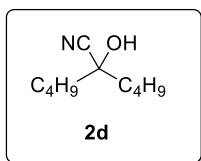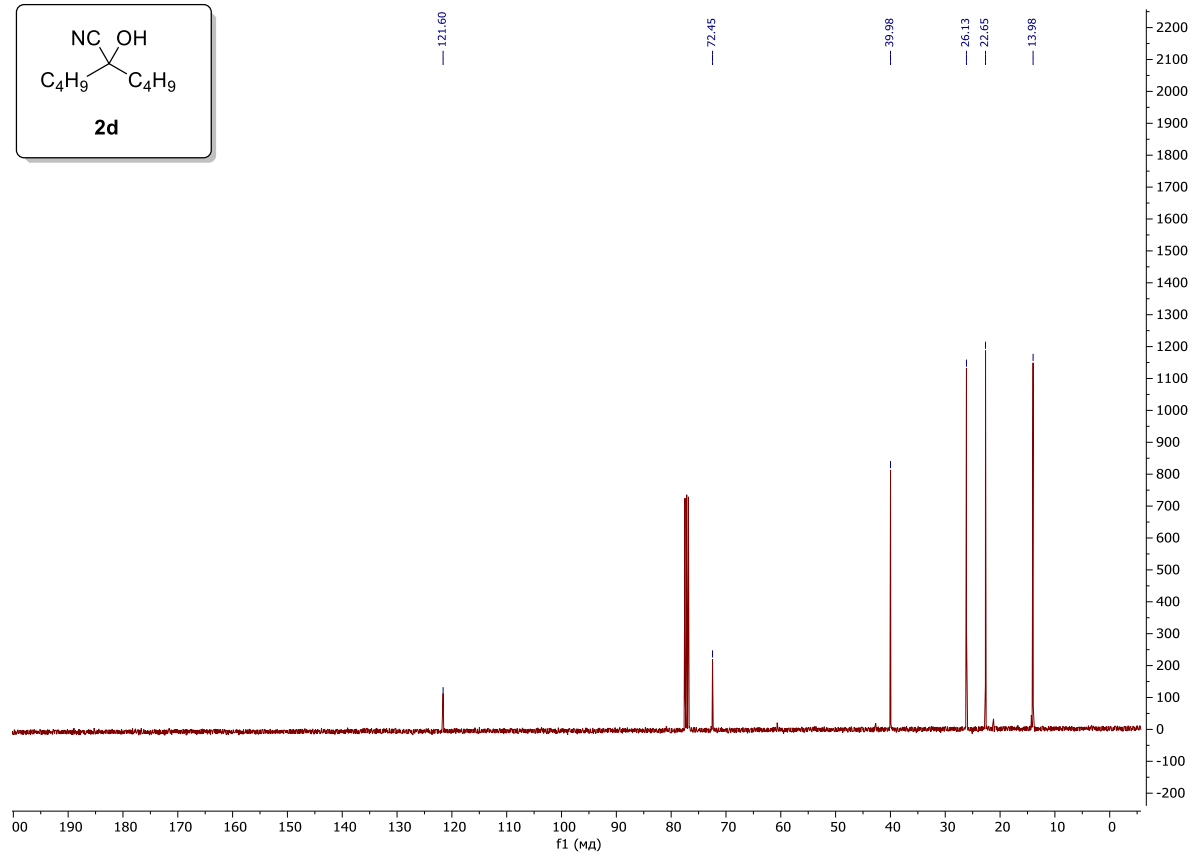

# Compound 2e

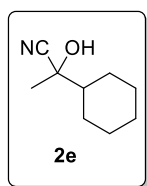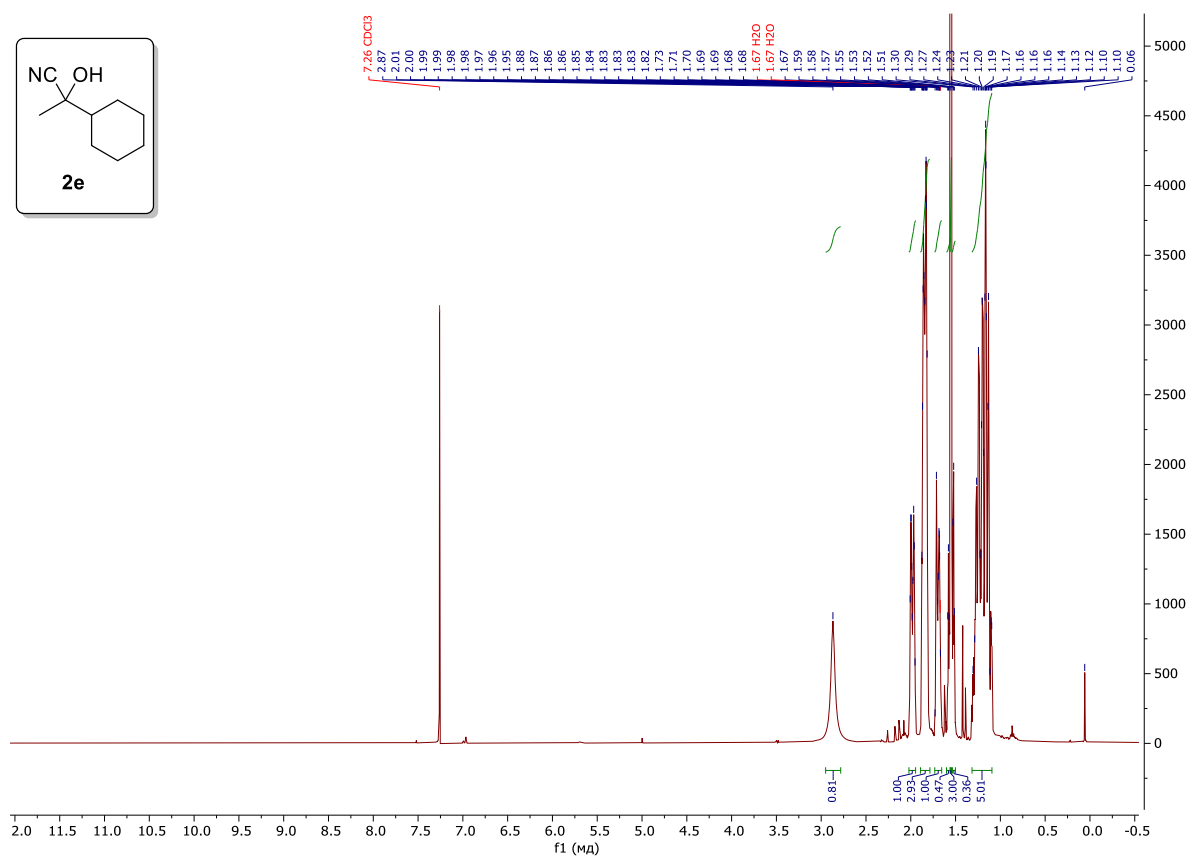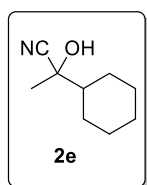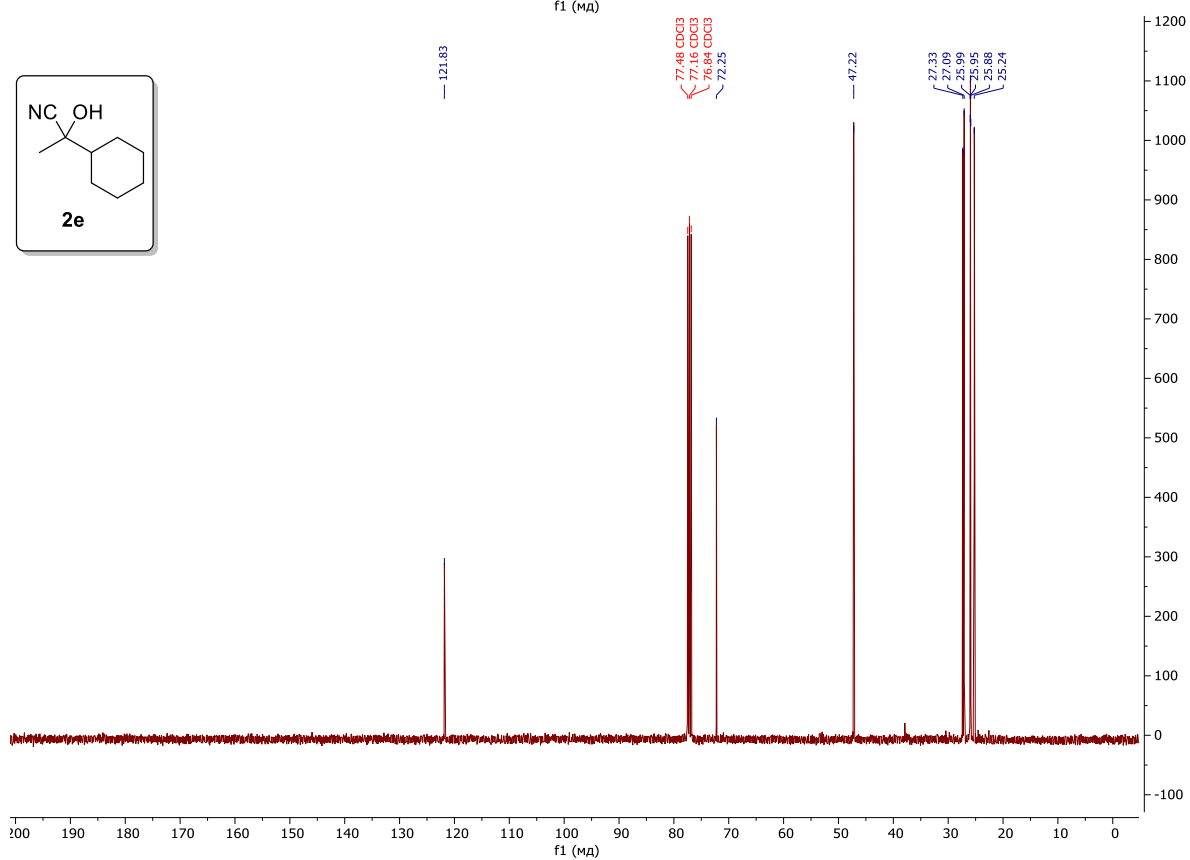

# Compound 2f

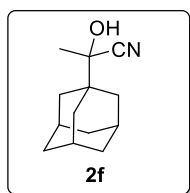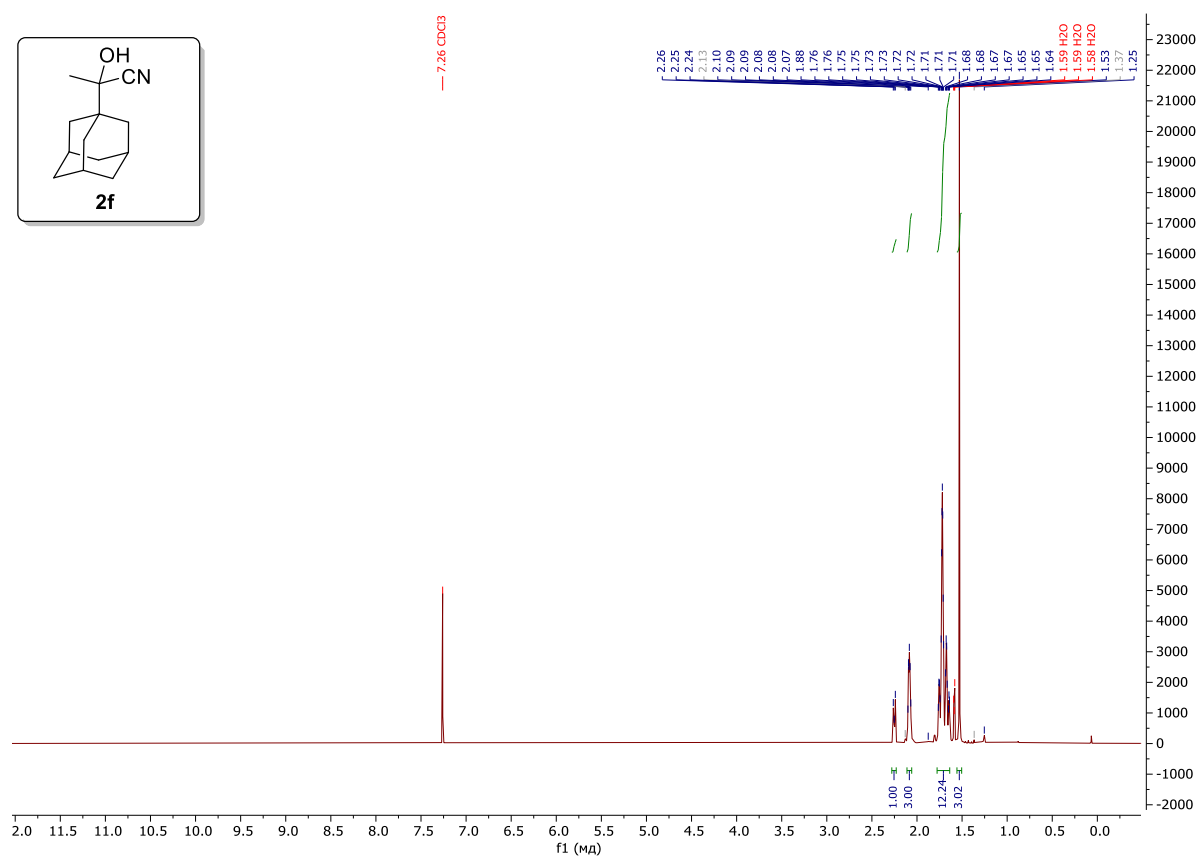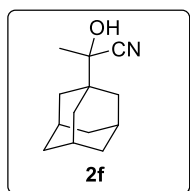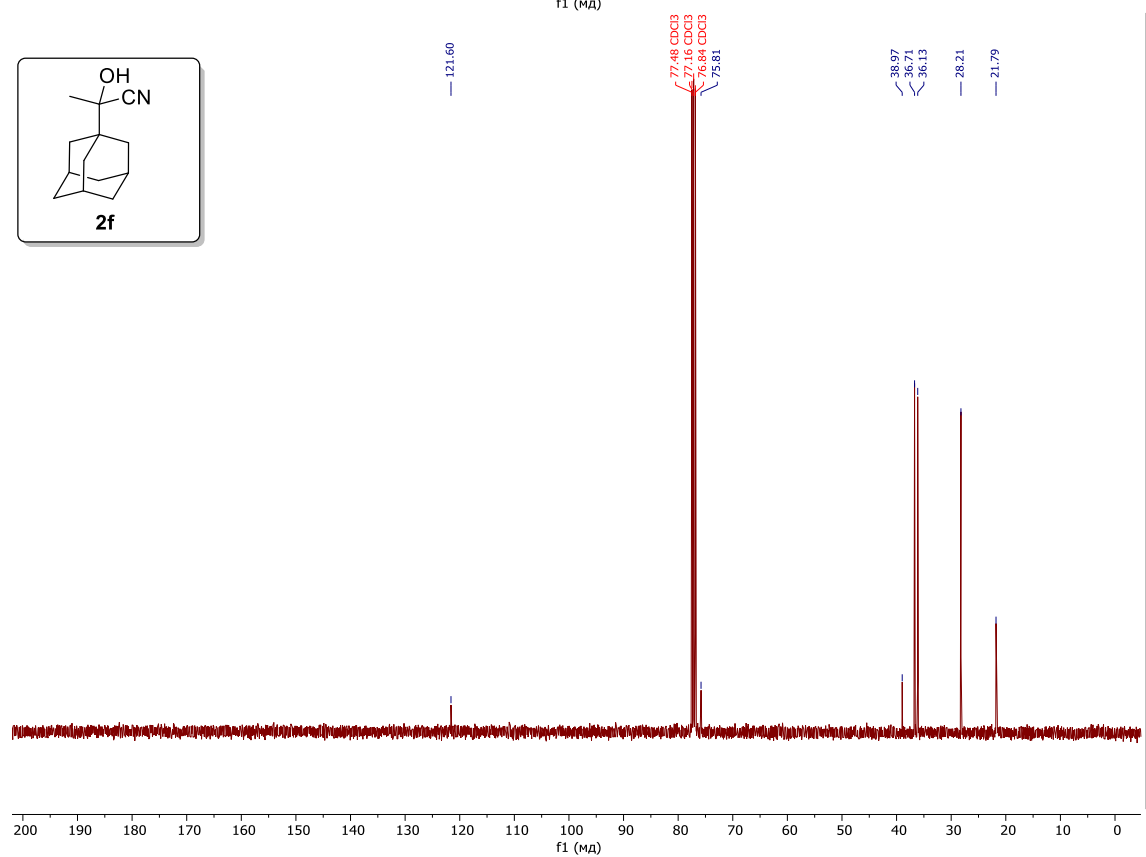

# Compound 2g

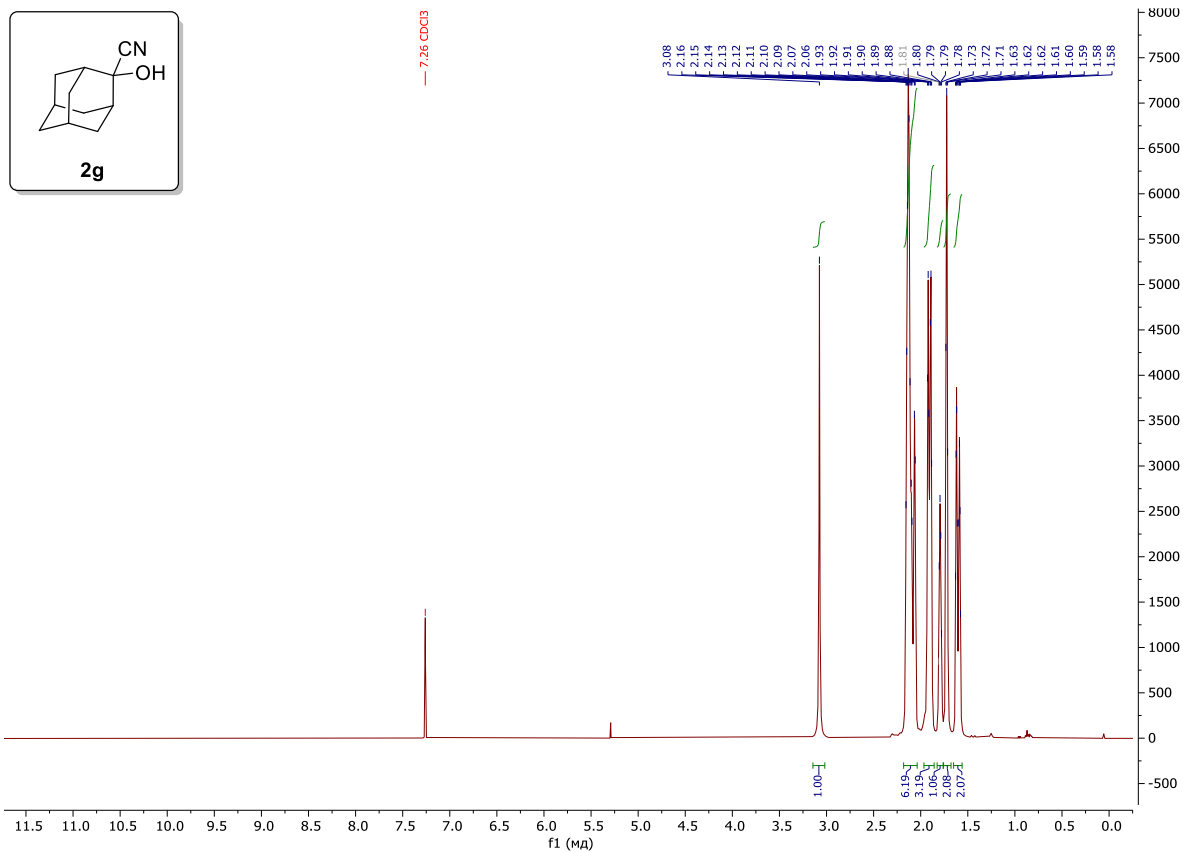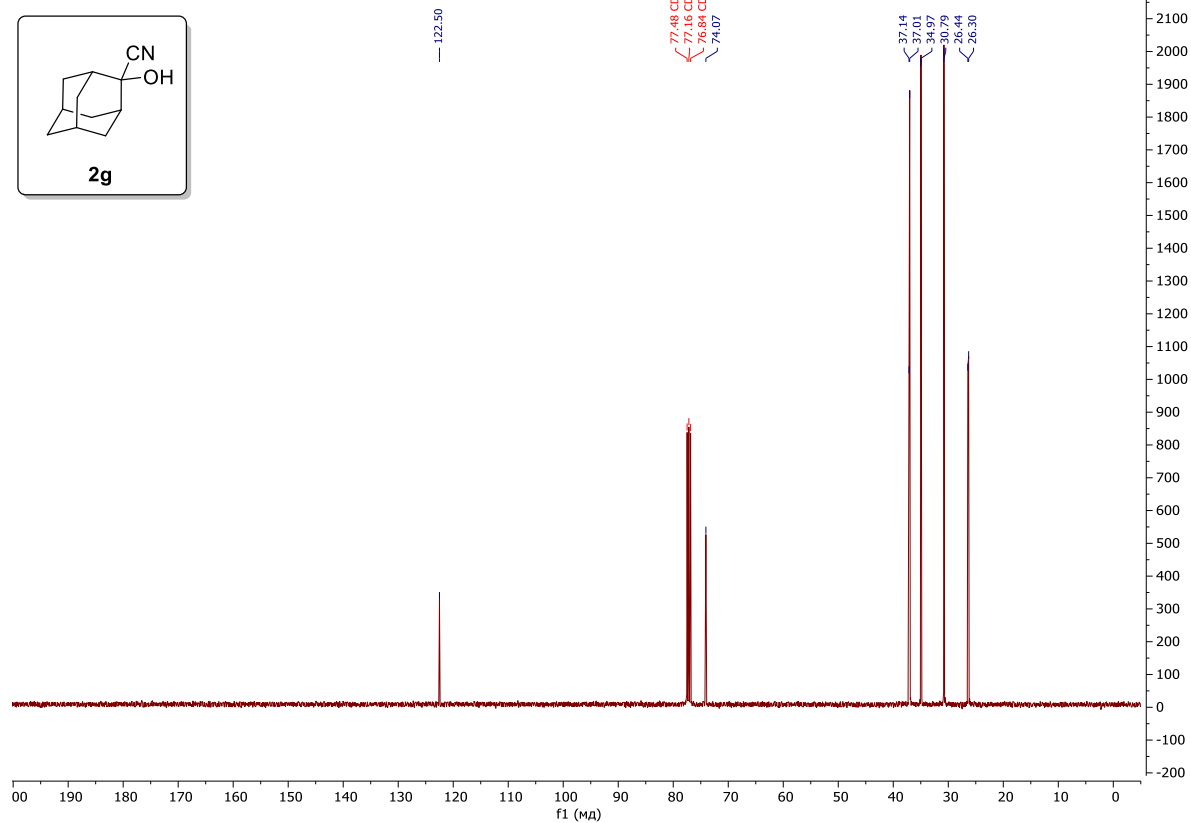

# Compound 2h

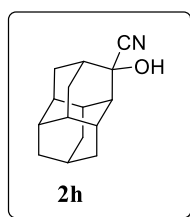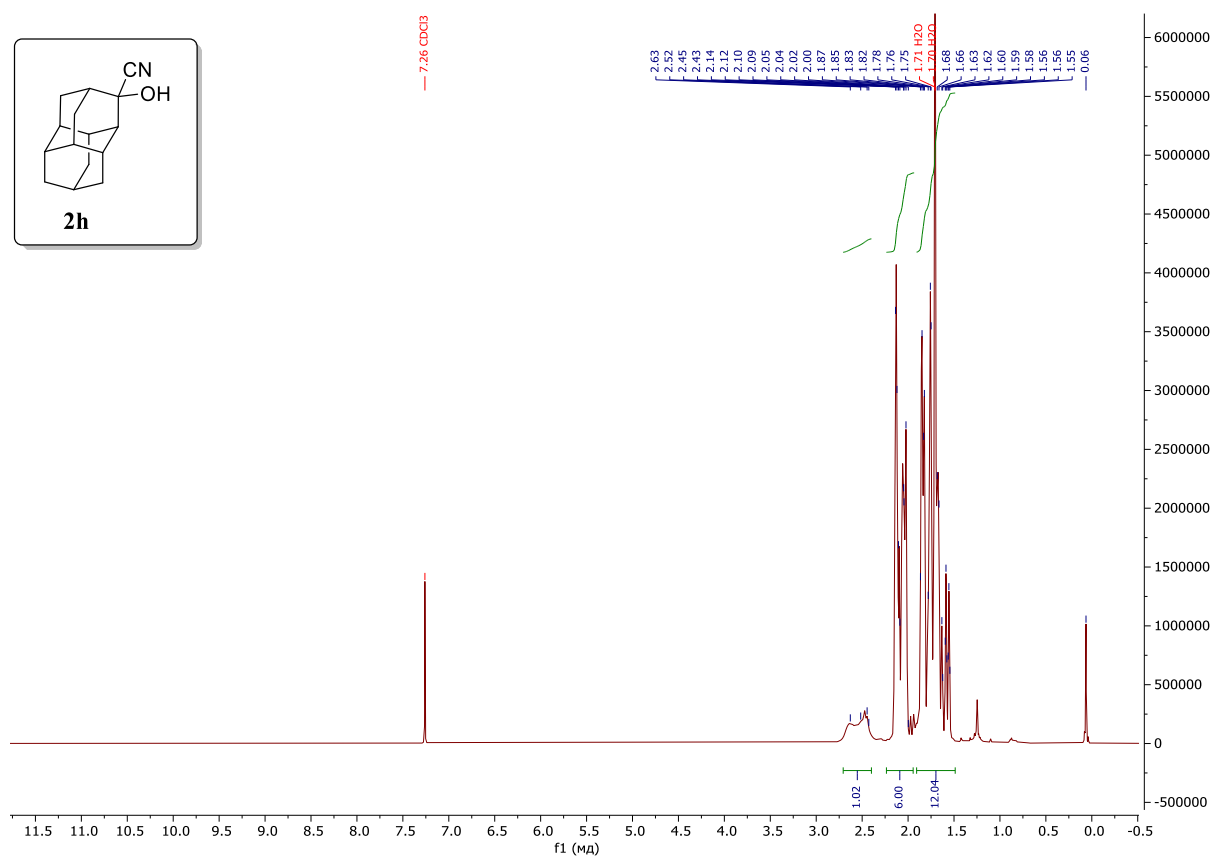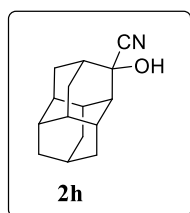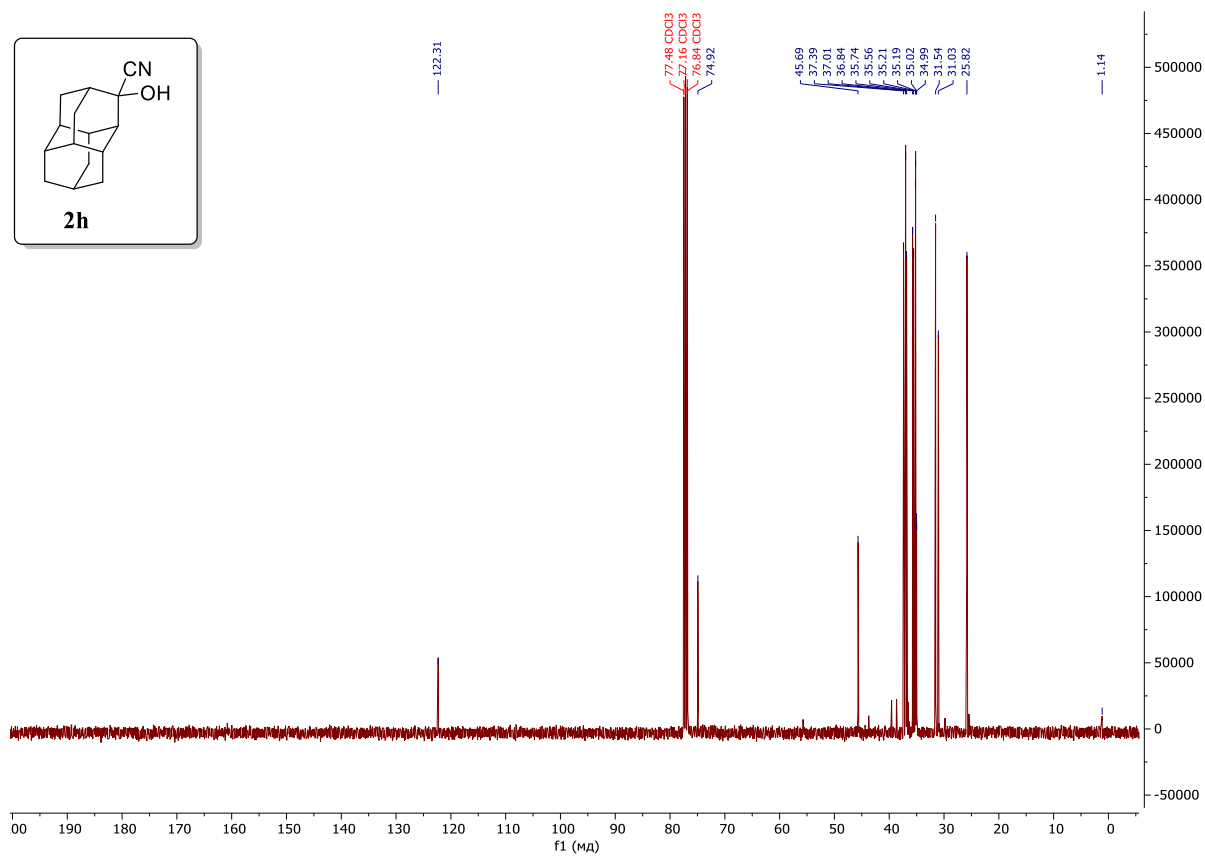

# Compound 3a

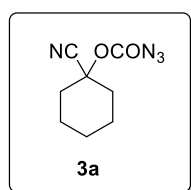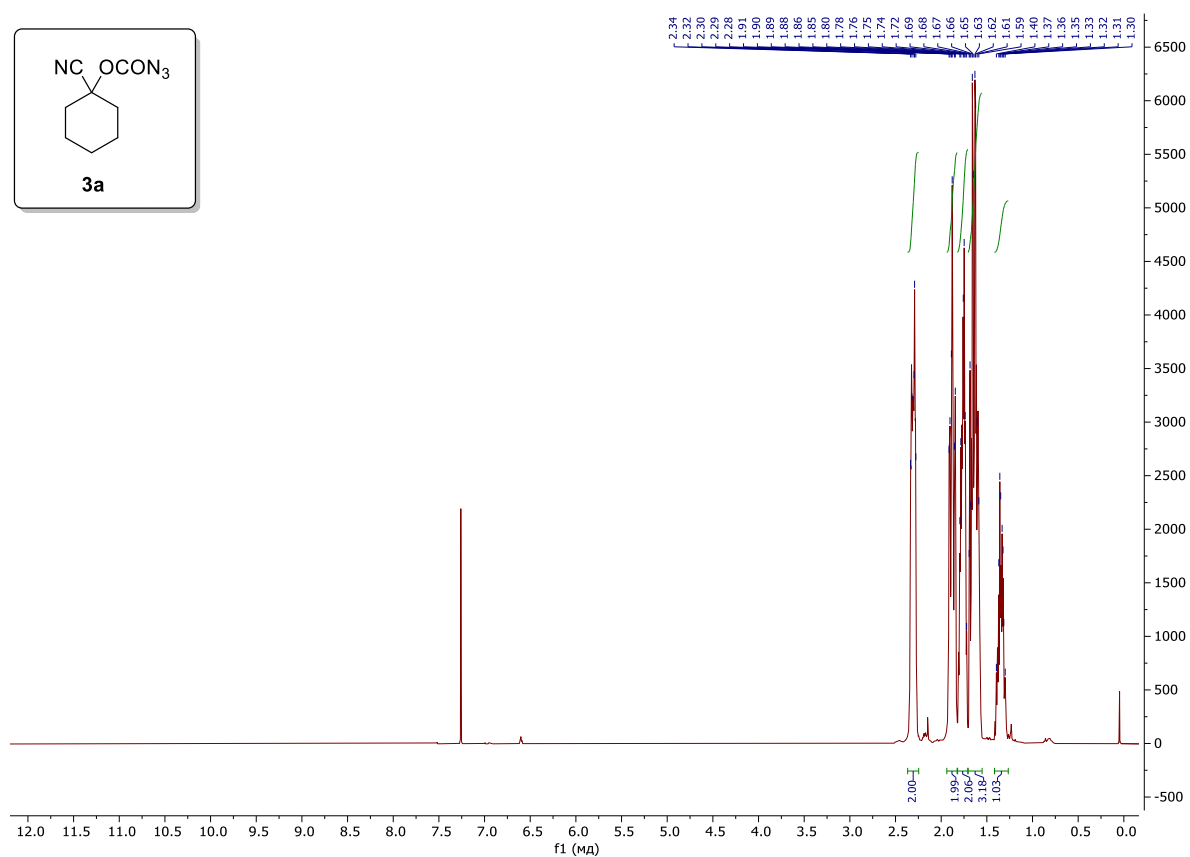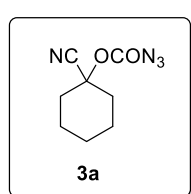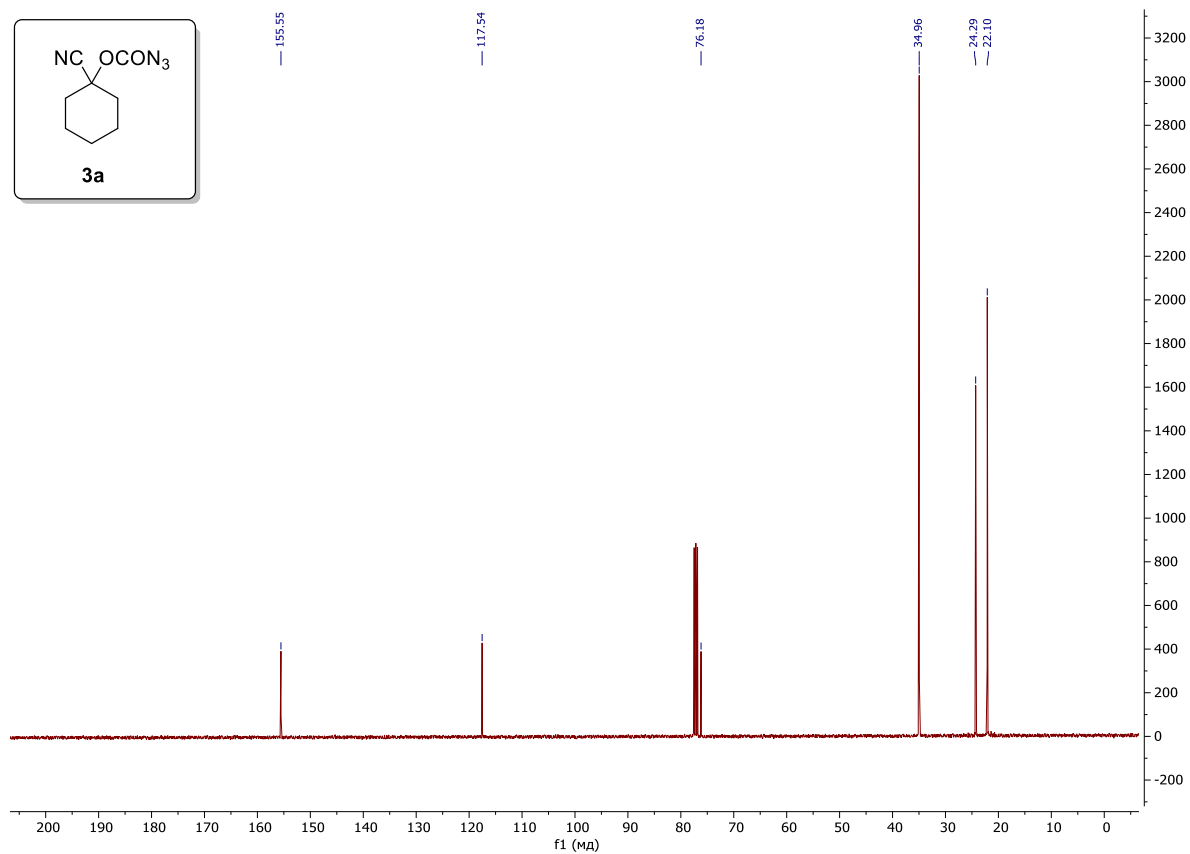

# Compound 3b

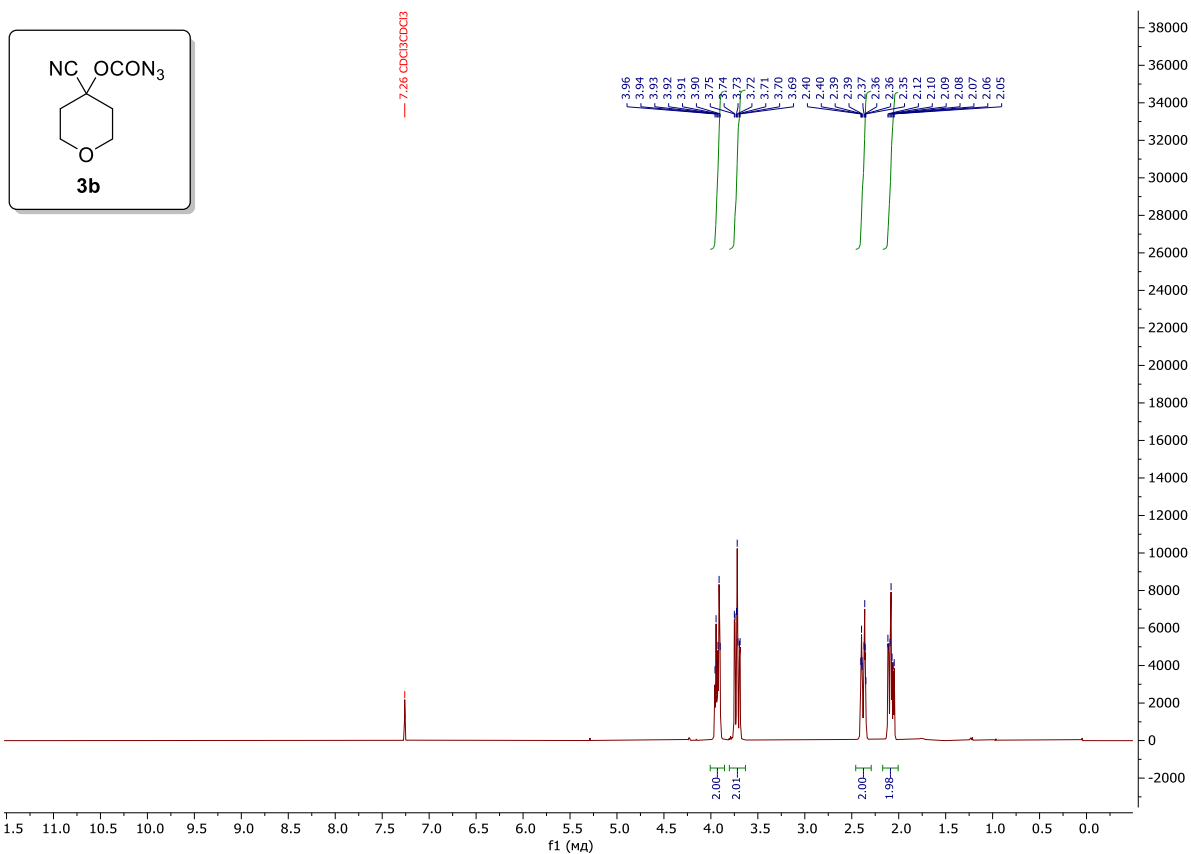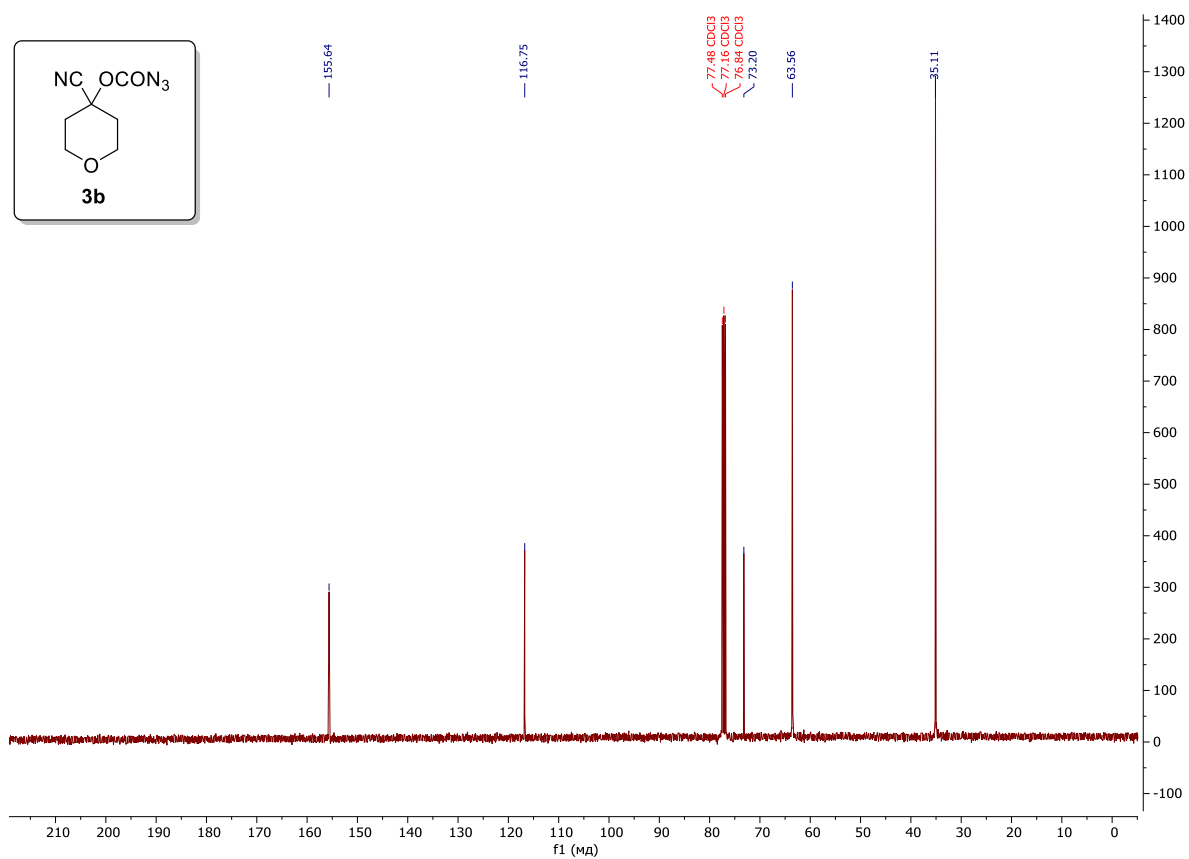

# Compound 3c

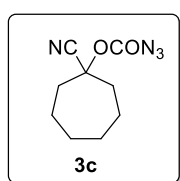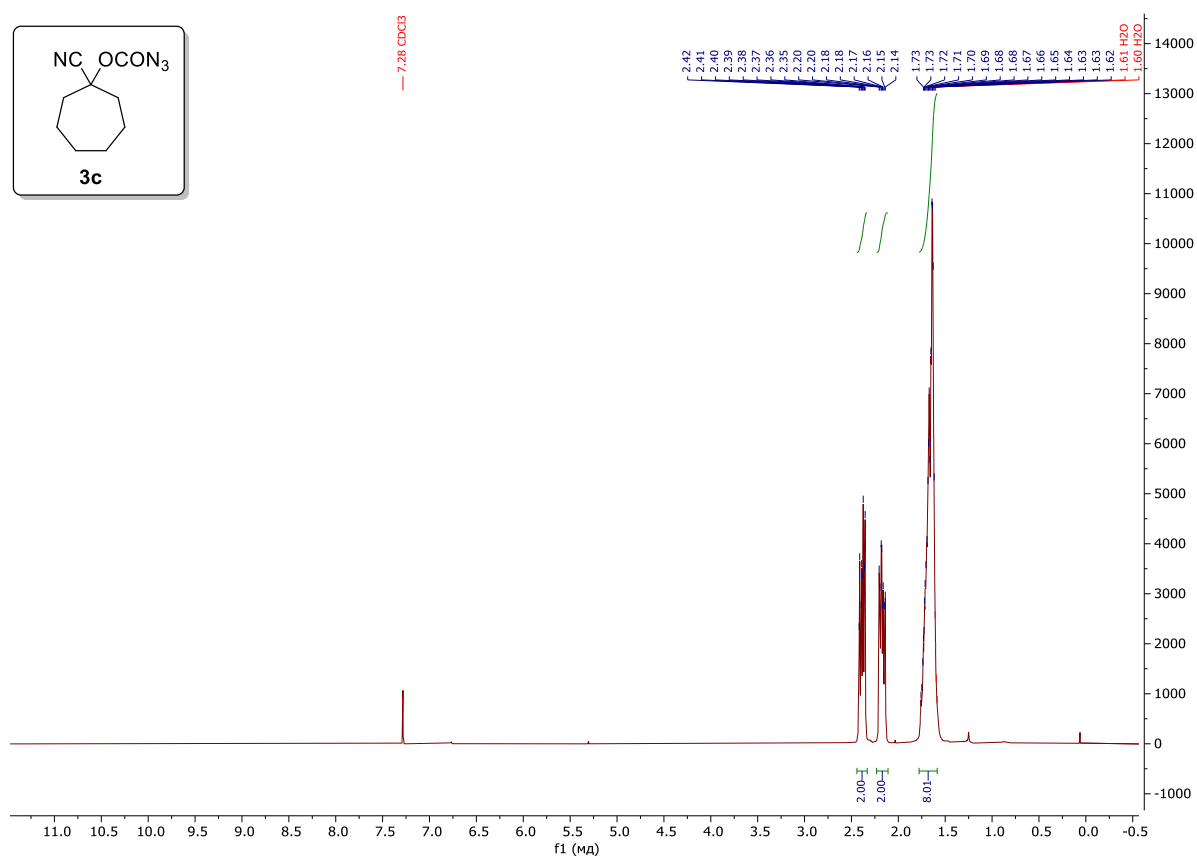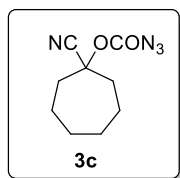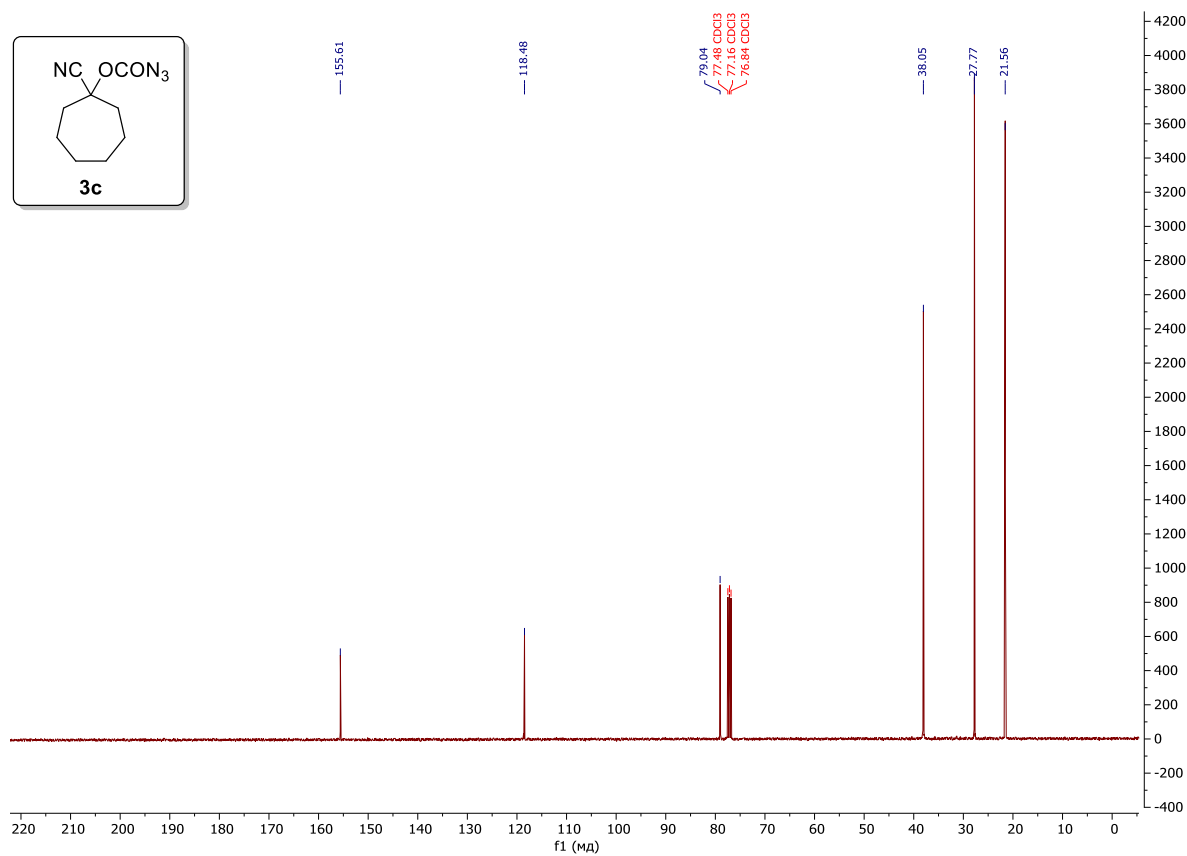

# Compound 3d

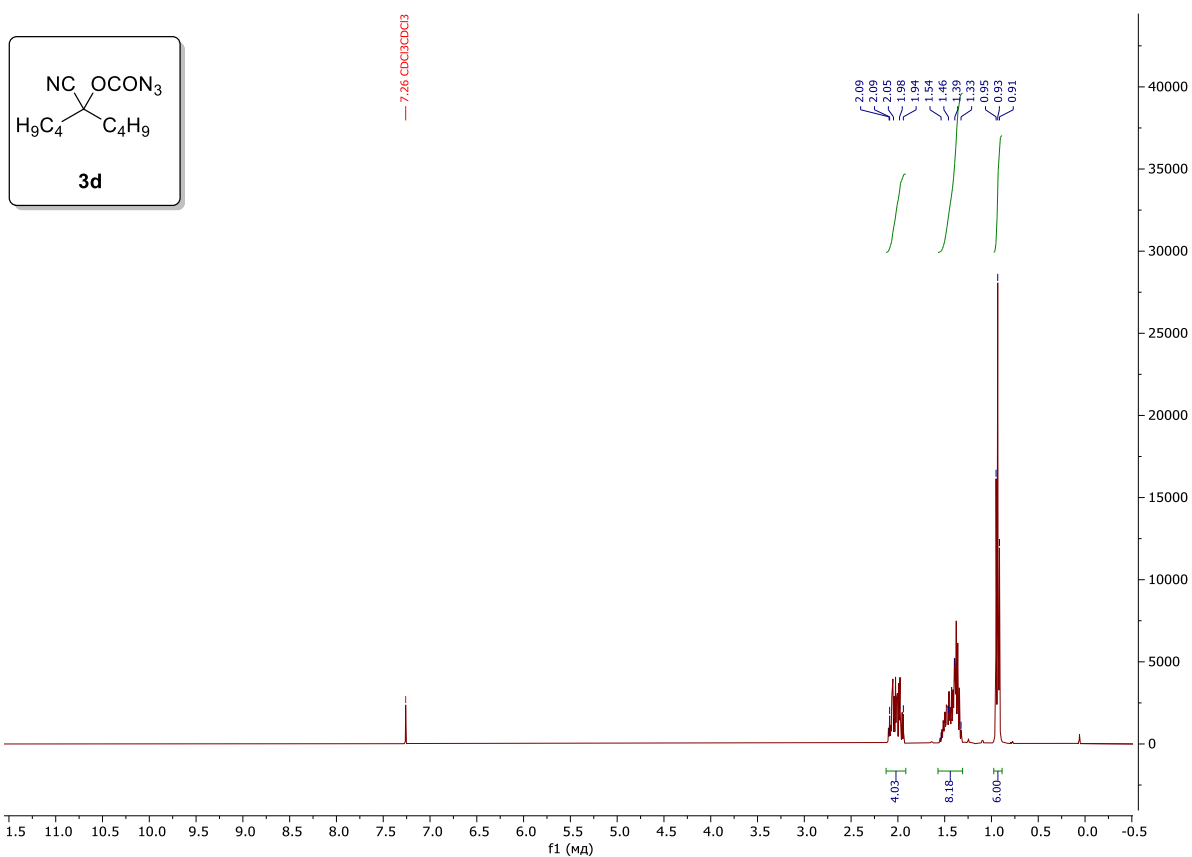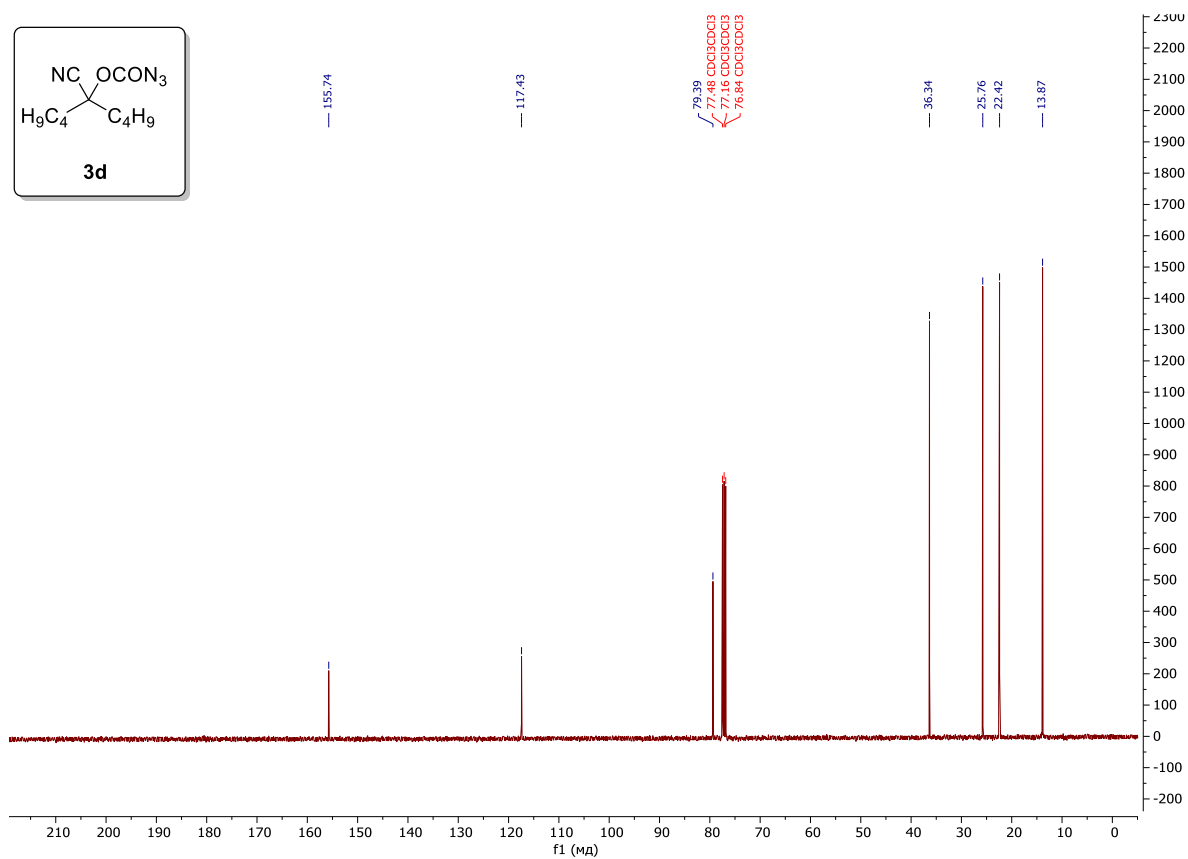

# Compound 3e

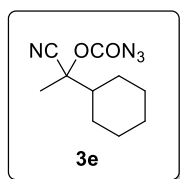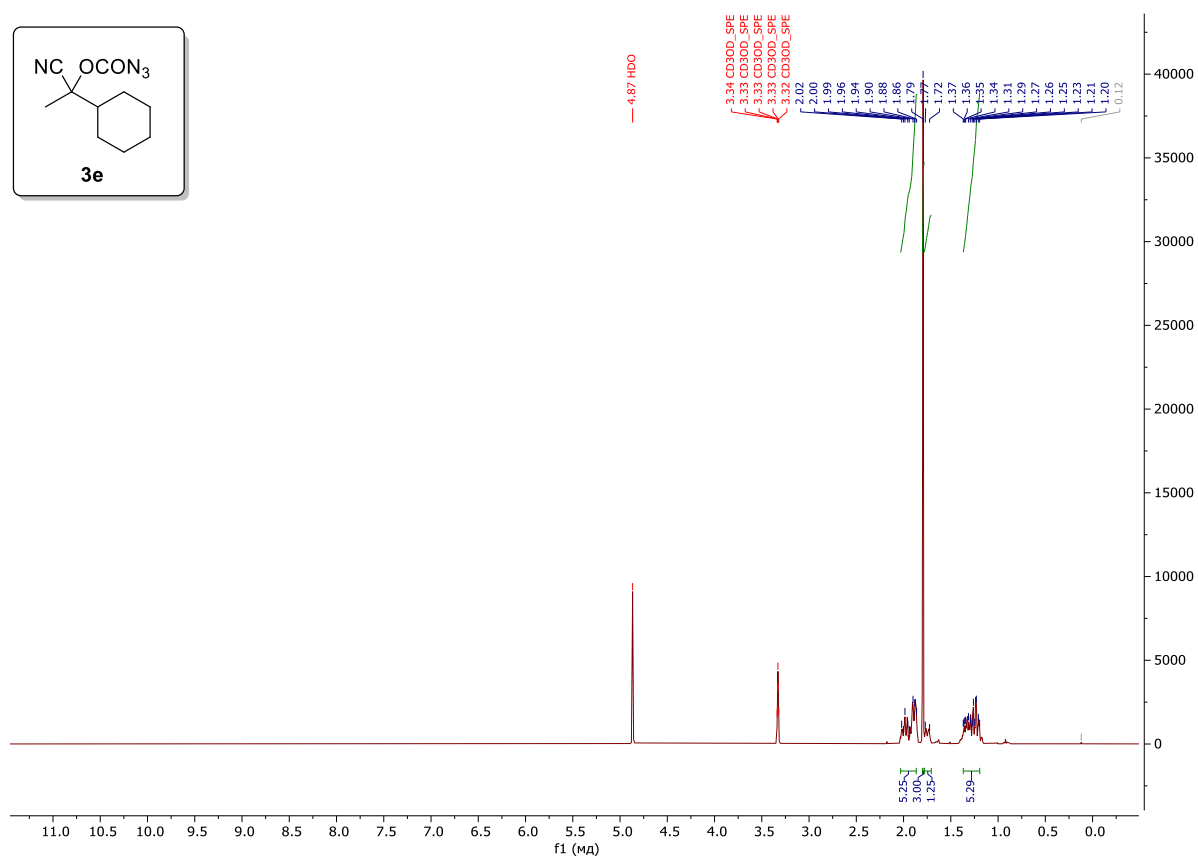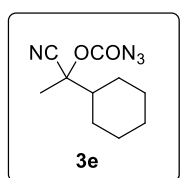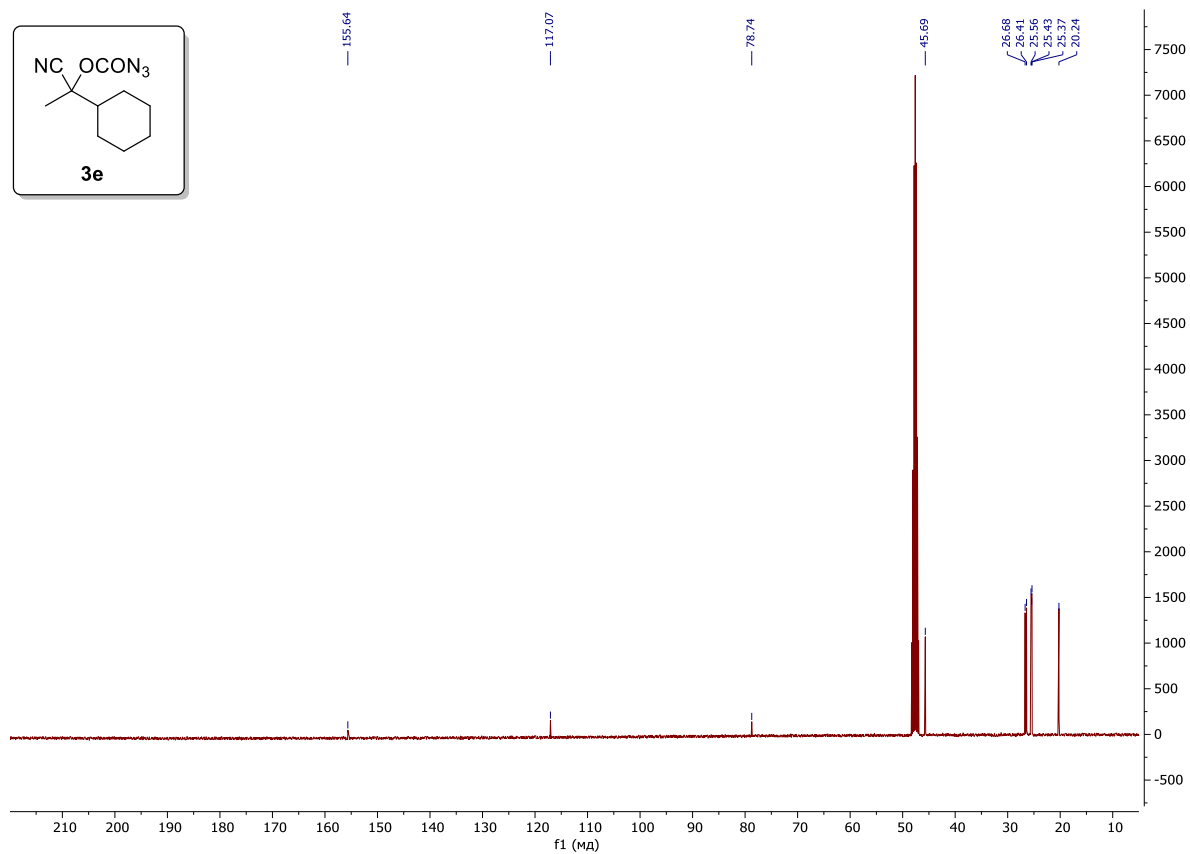

# Compound 3f

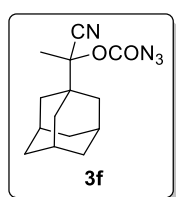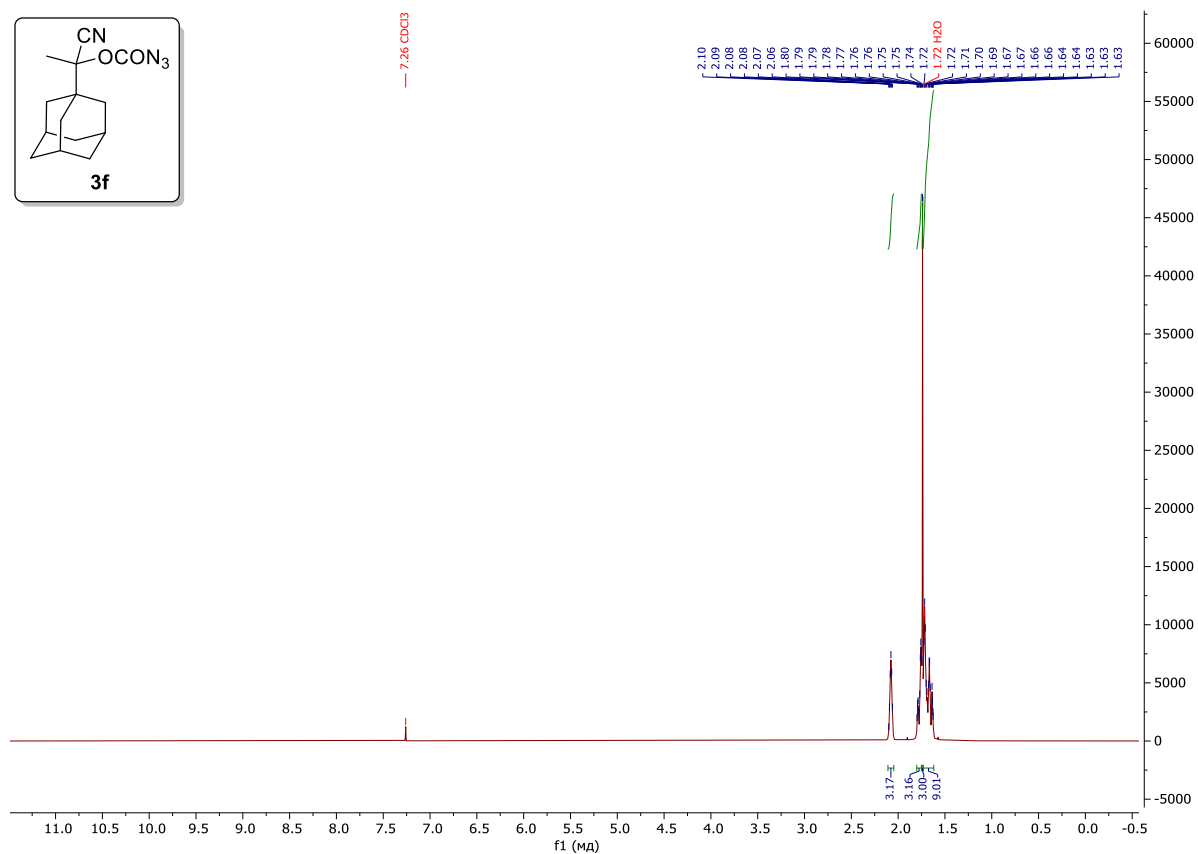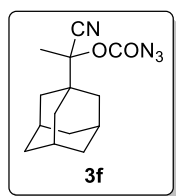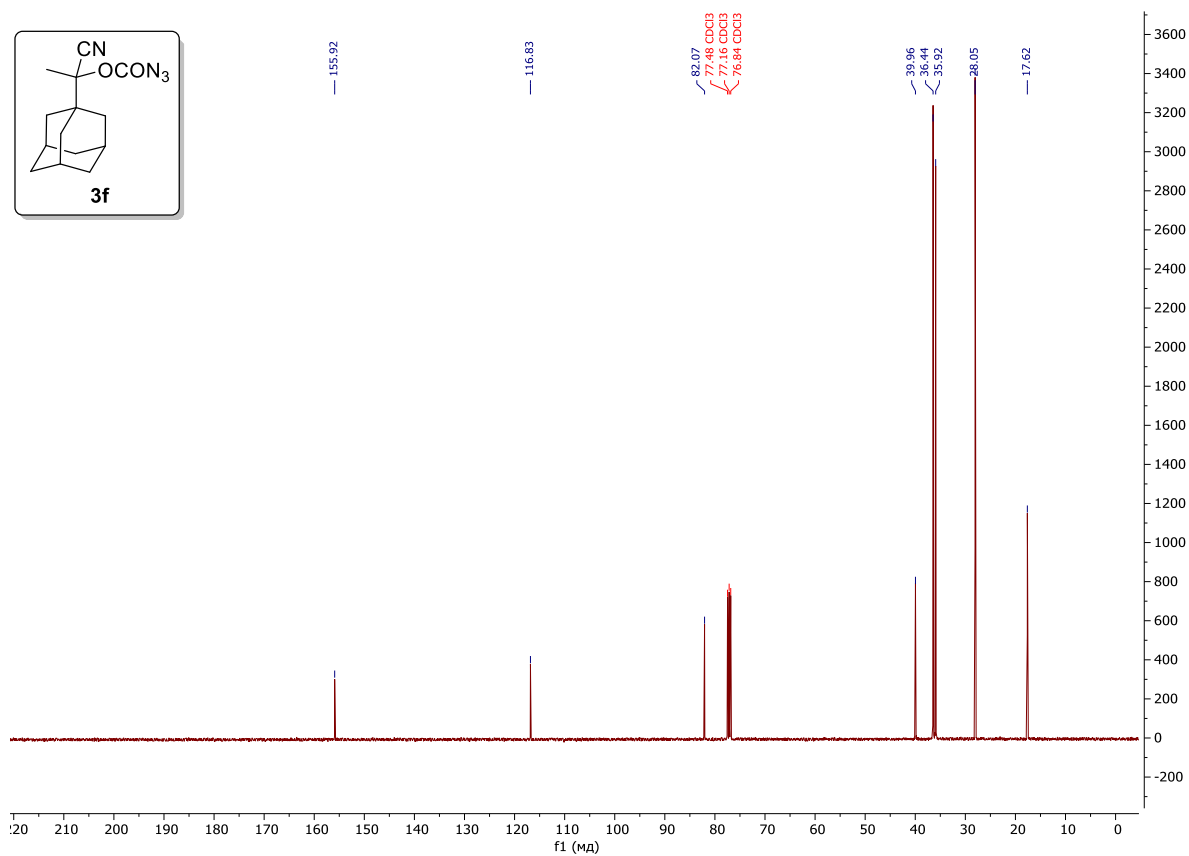

# Compound 3g

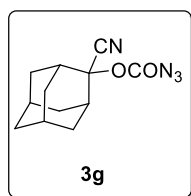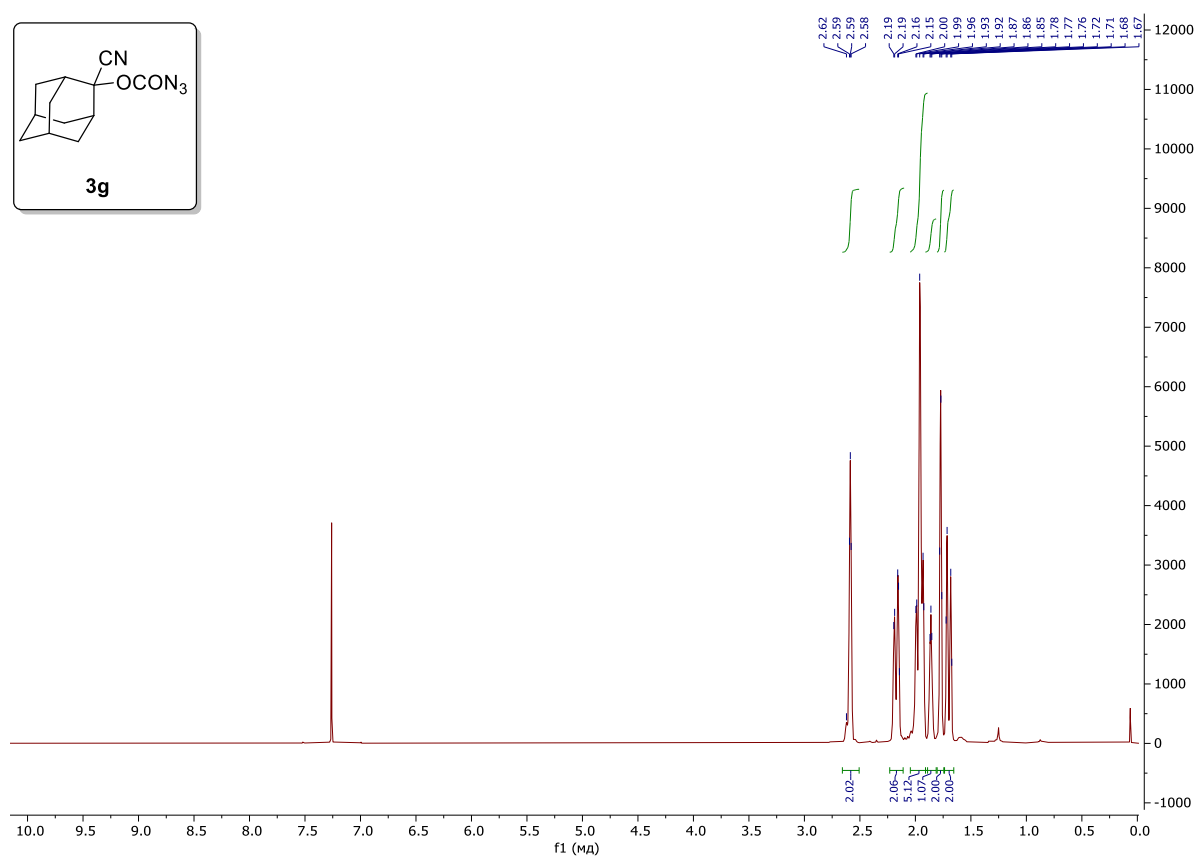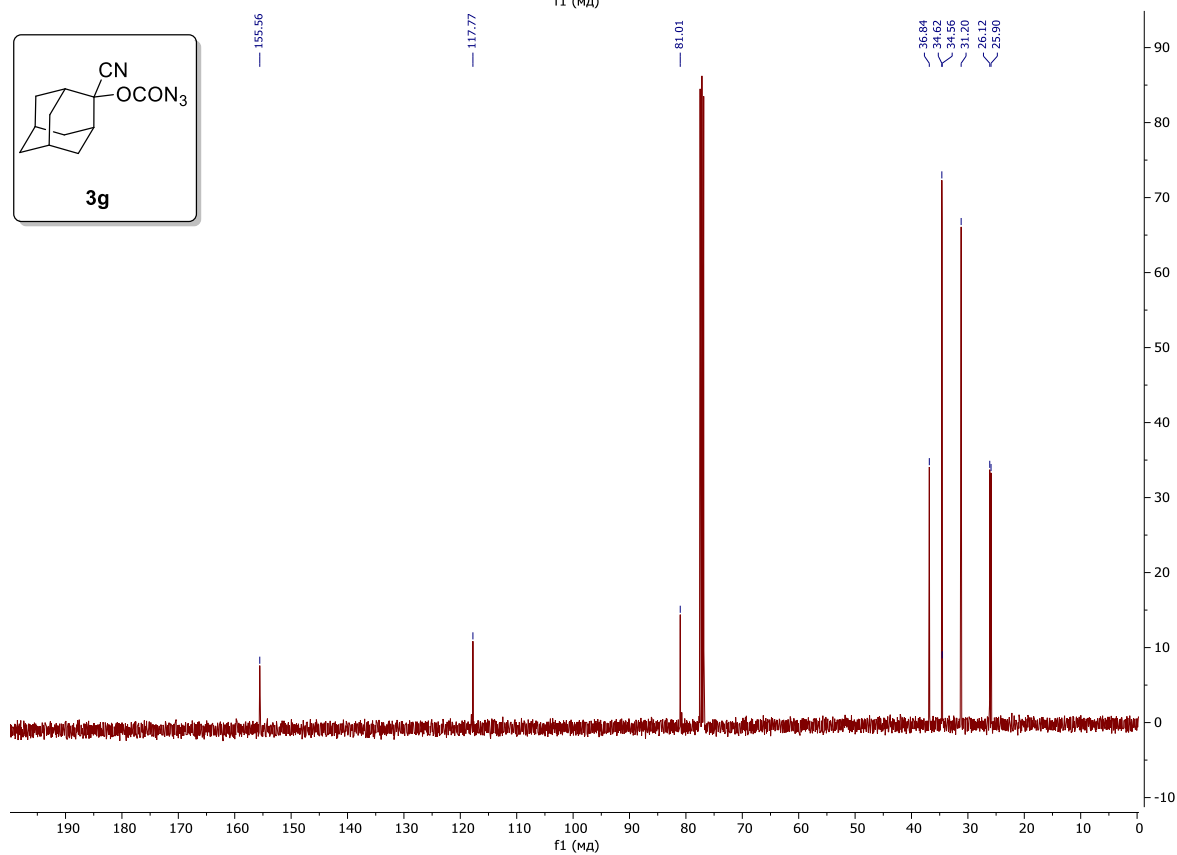

# Compound 3h

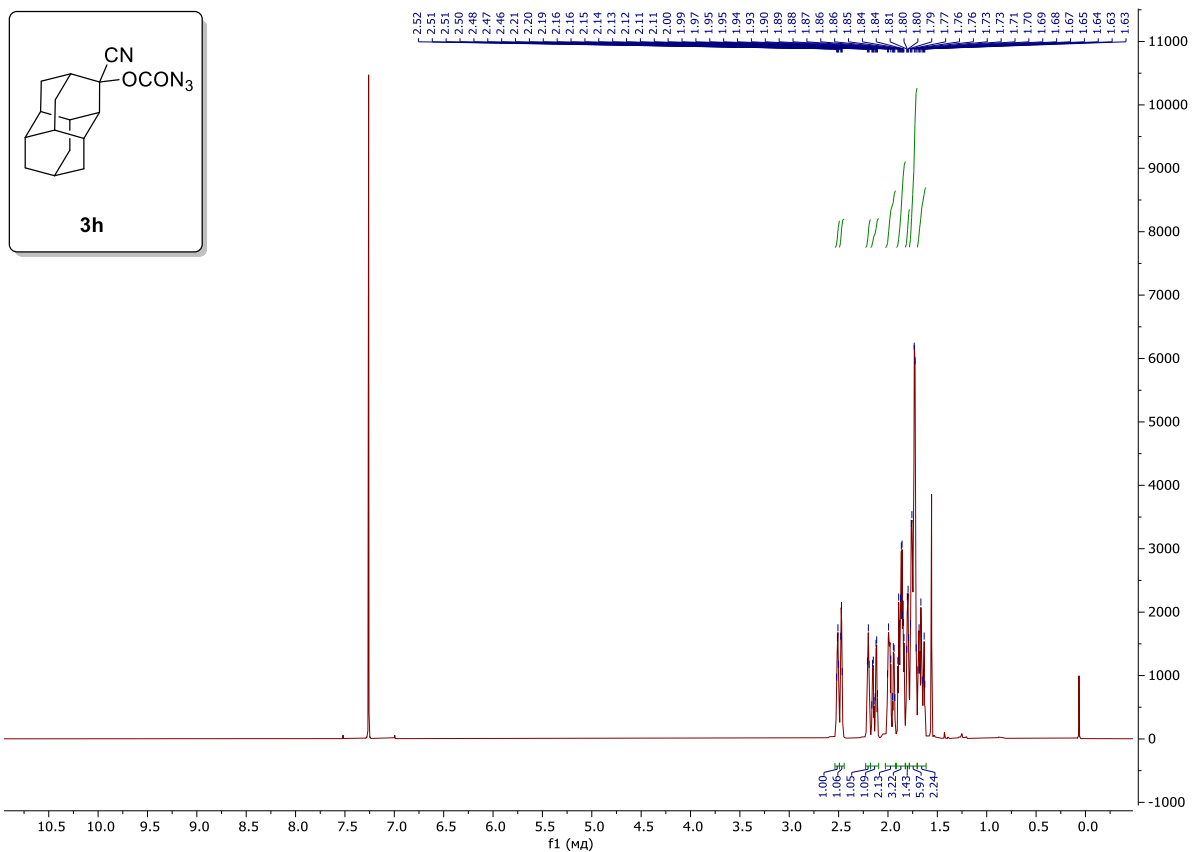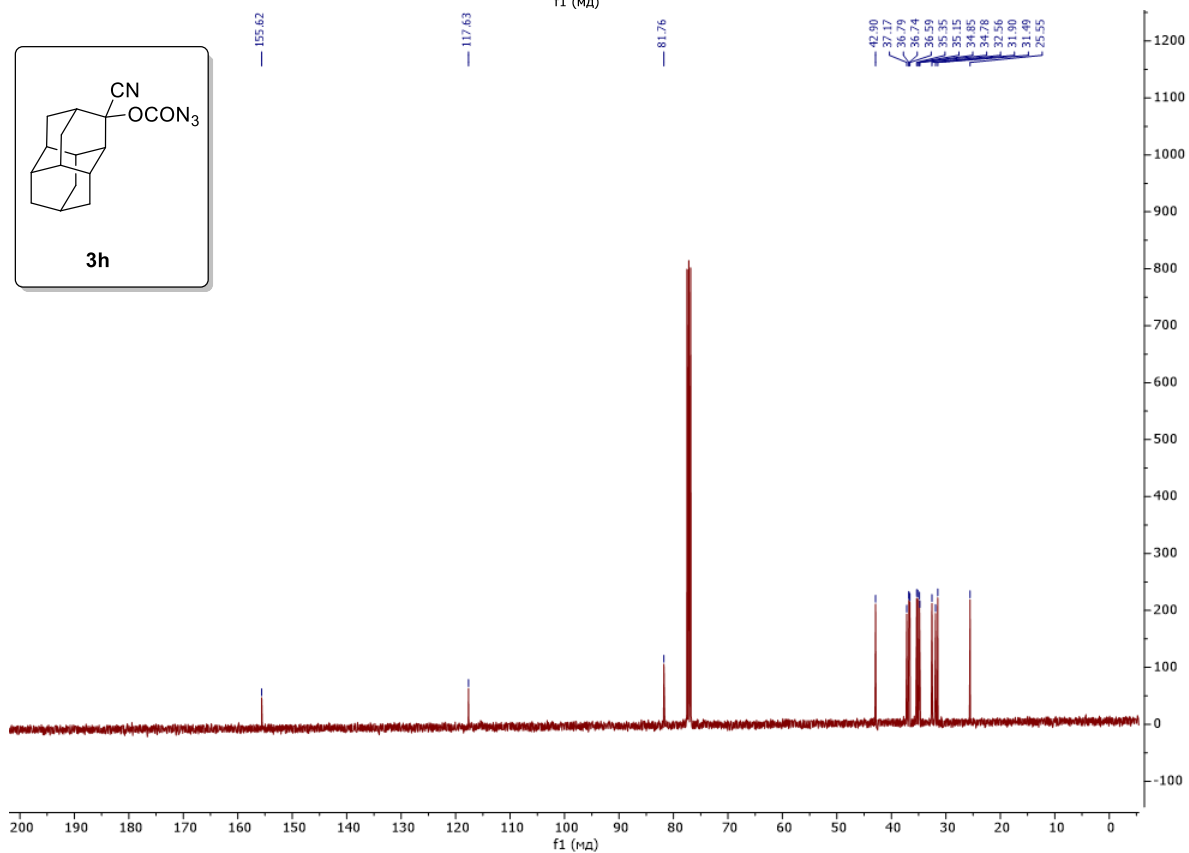

## Compound 4a

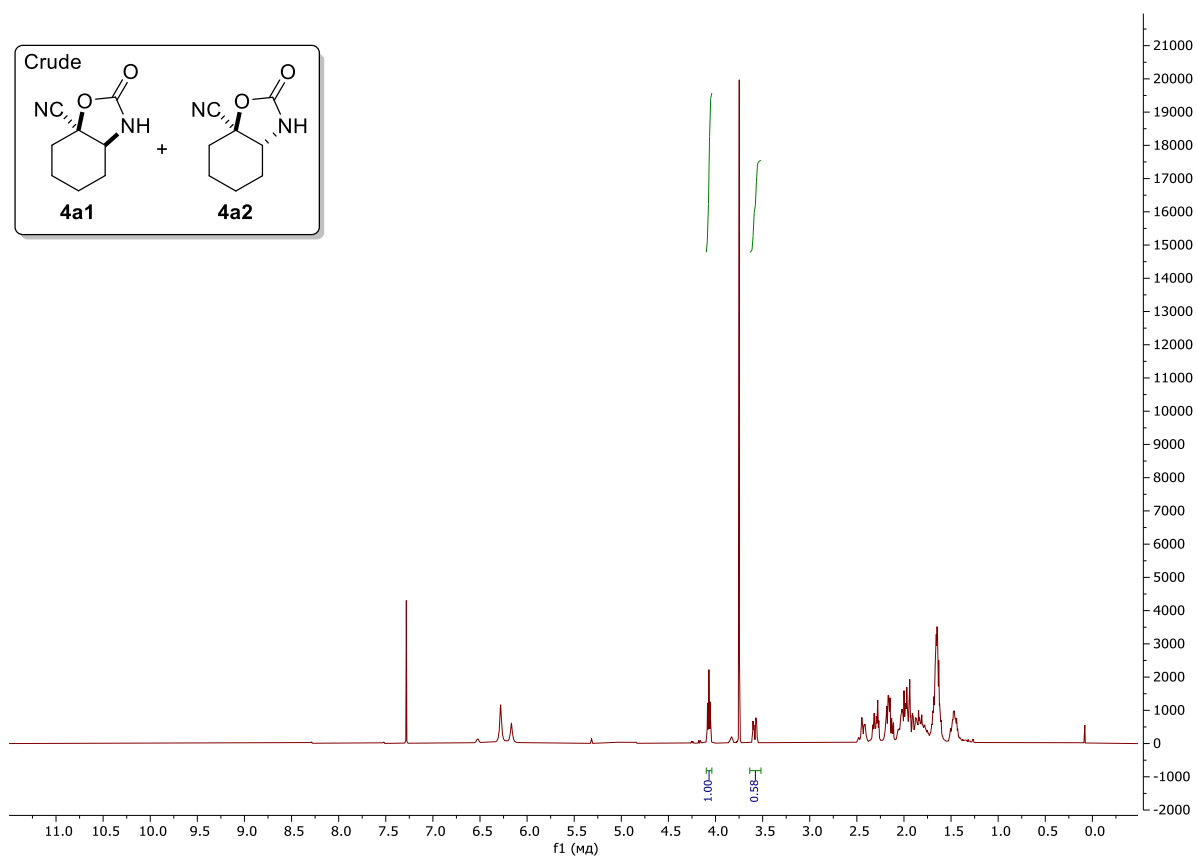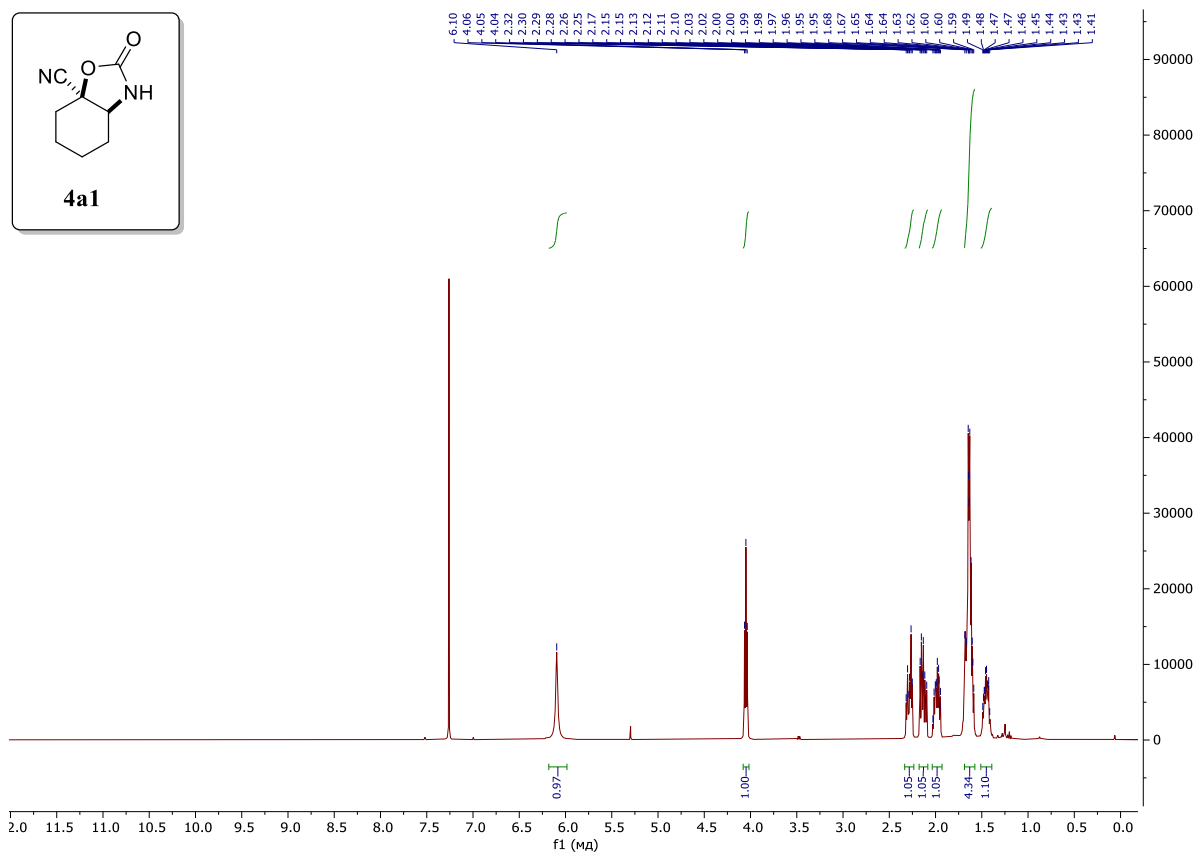

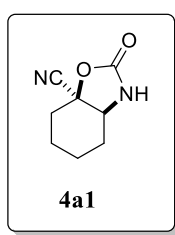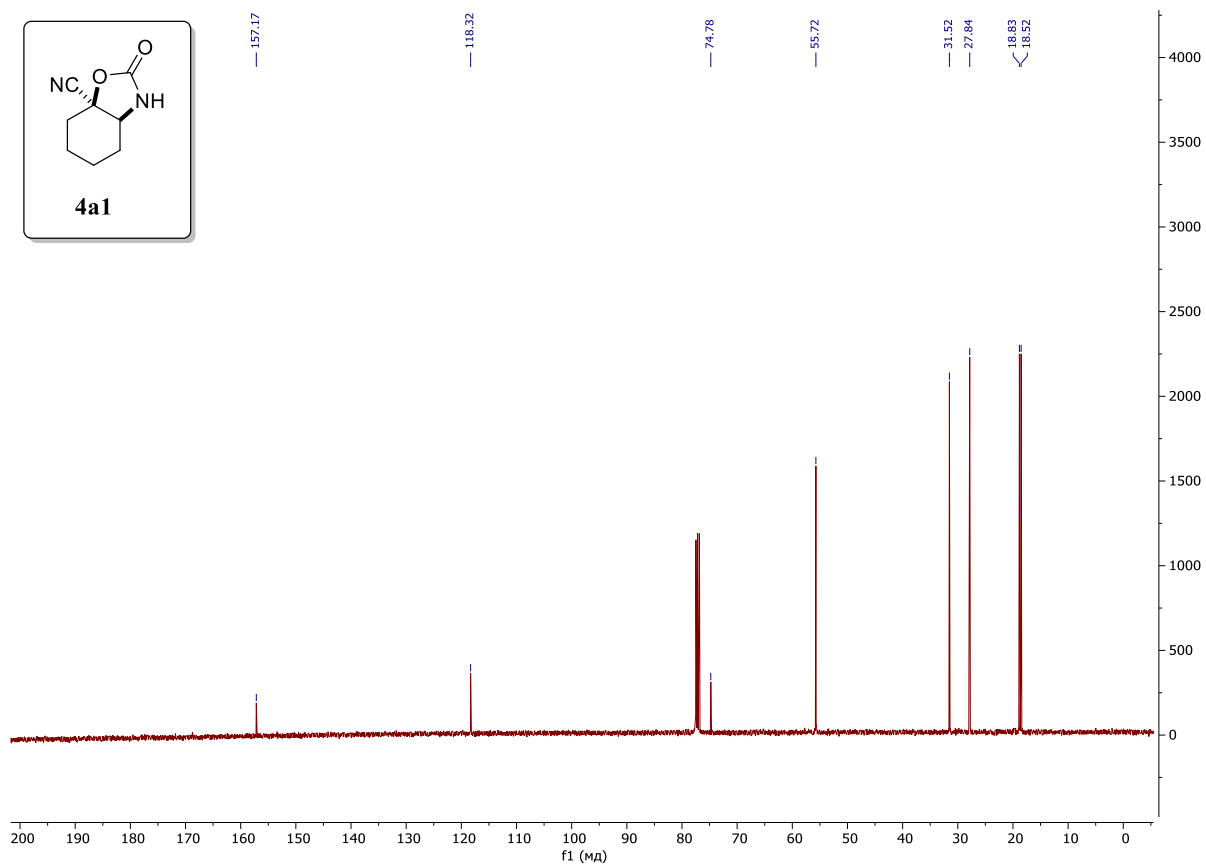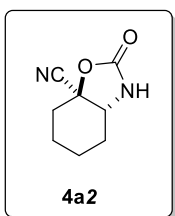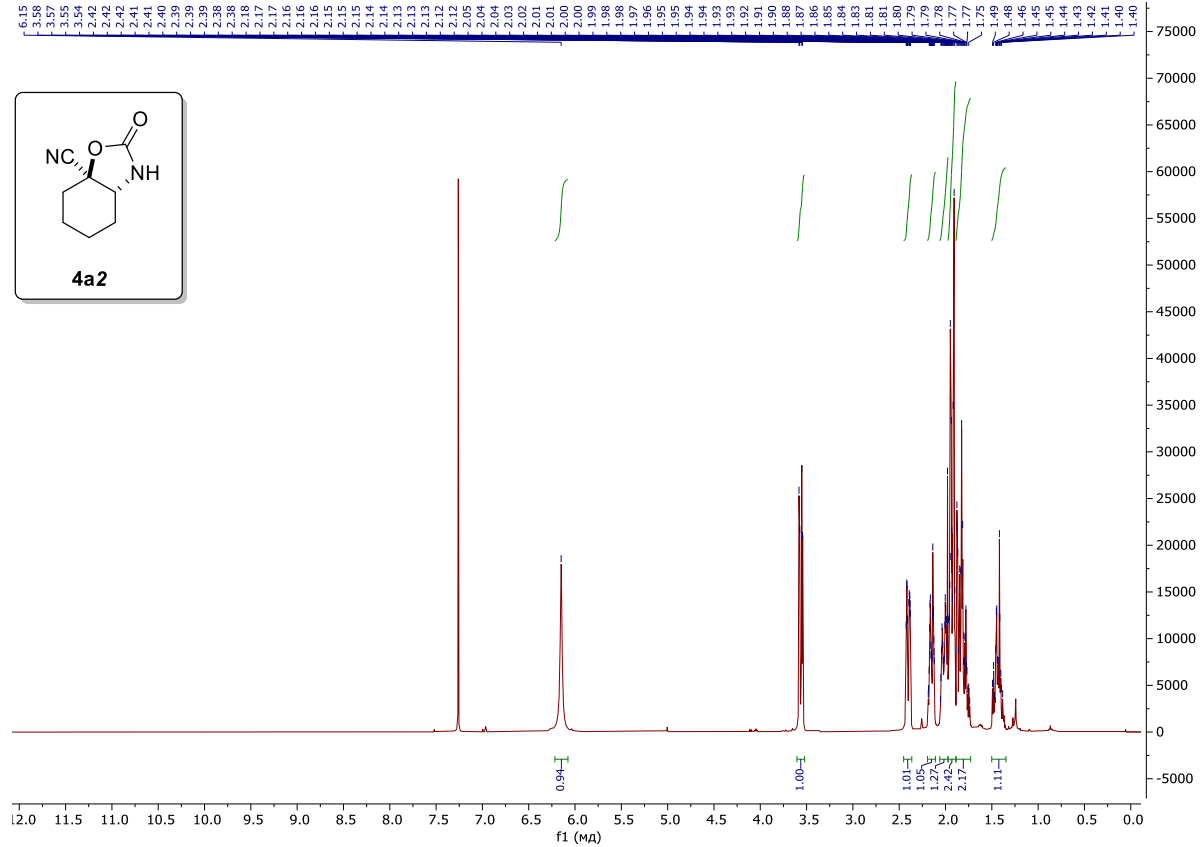

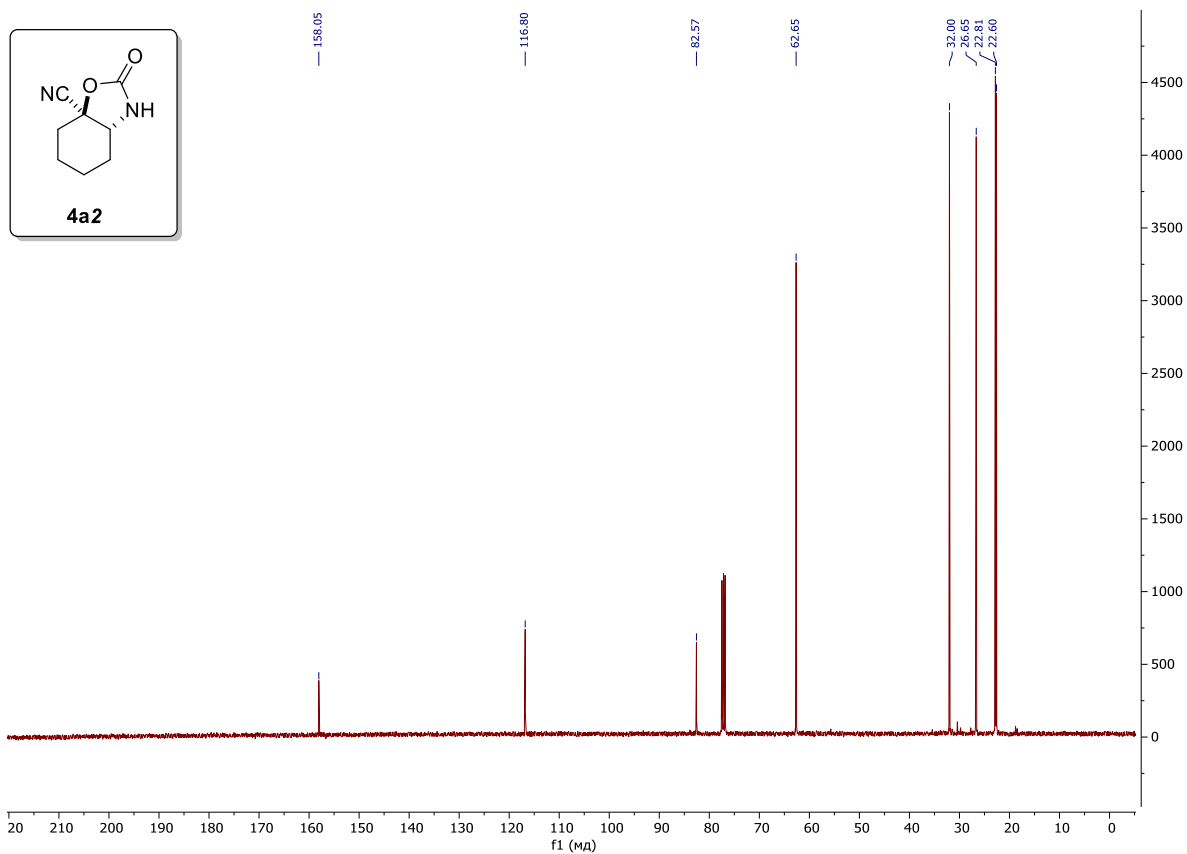

### Compound 4b

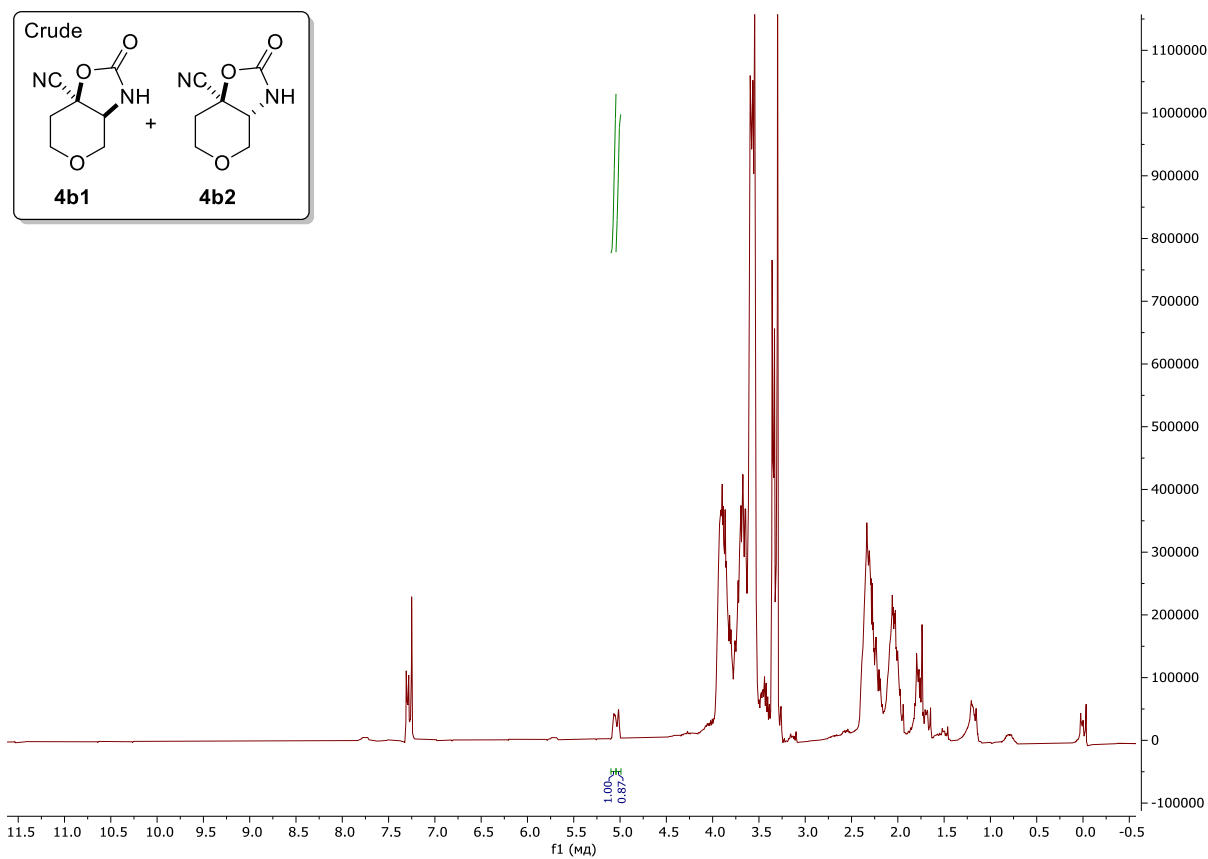

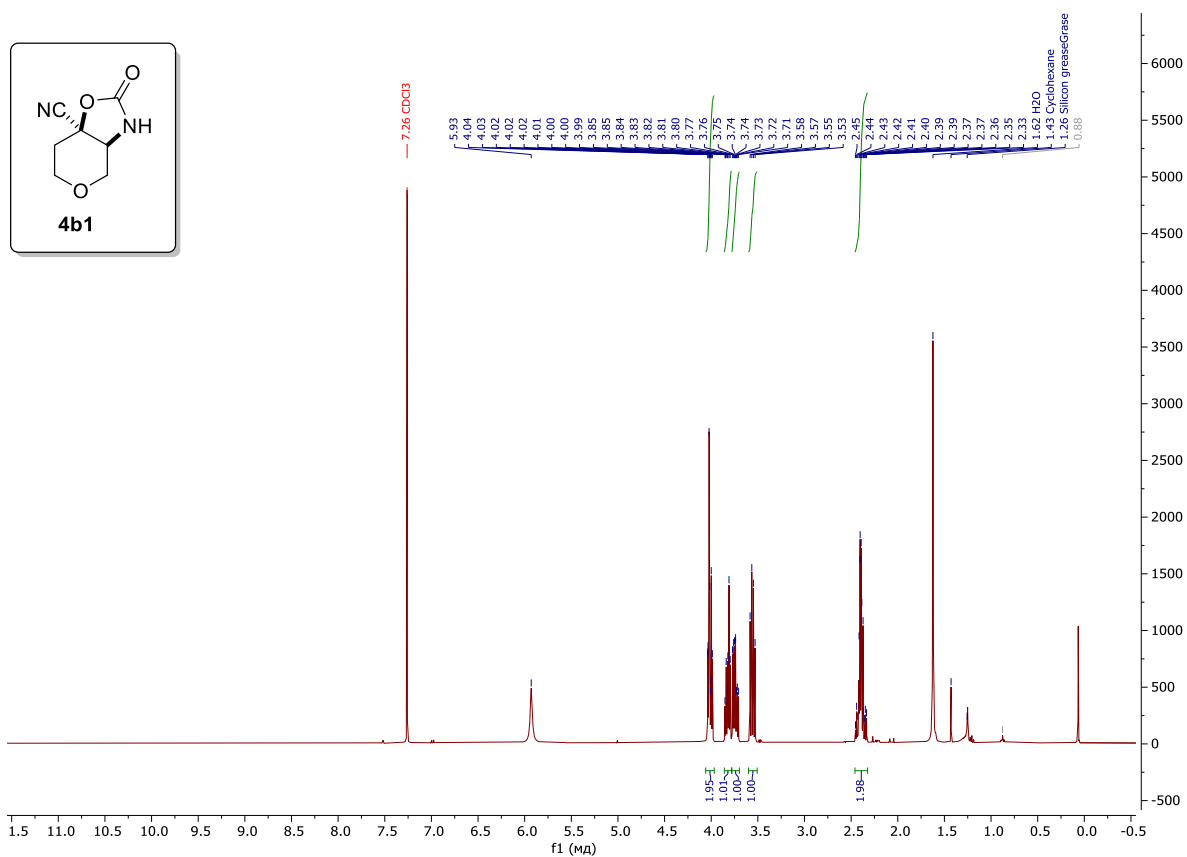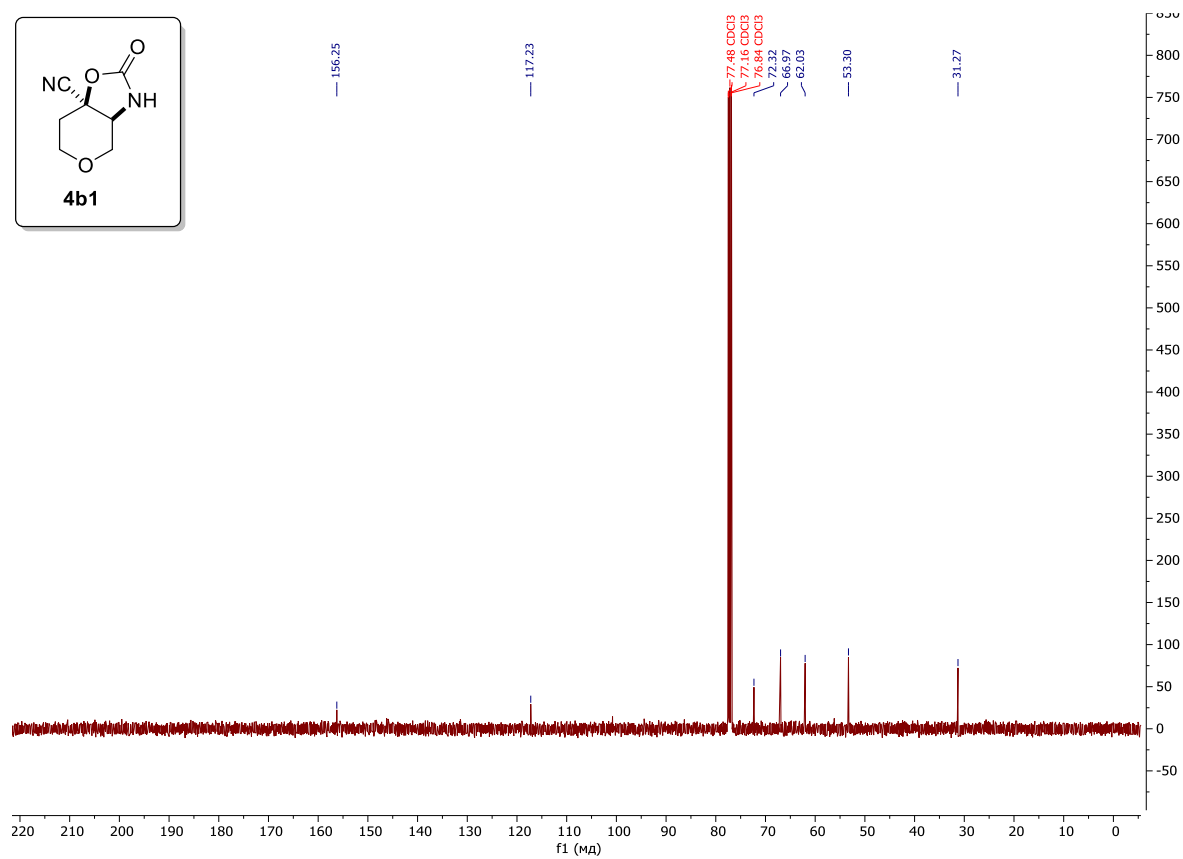

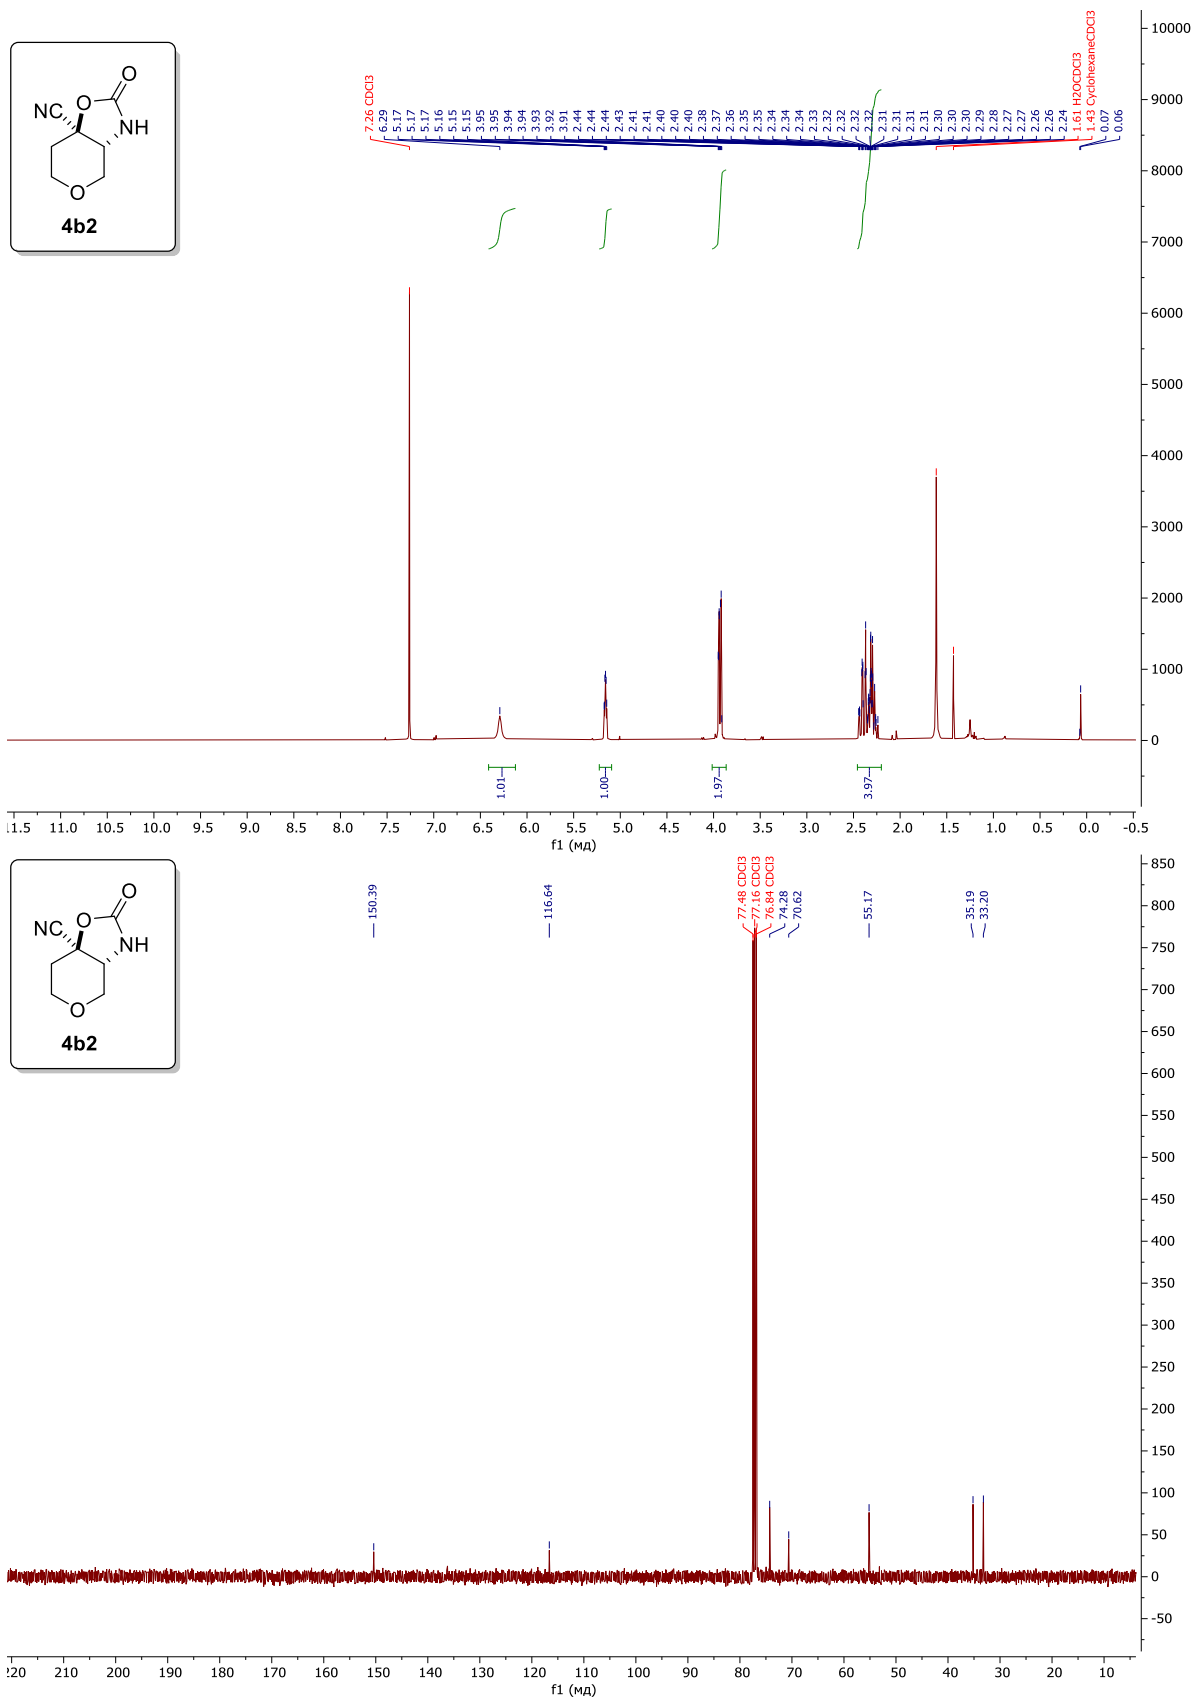

### Compound 4c

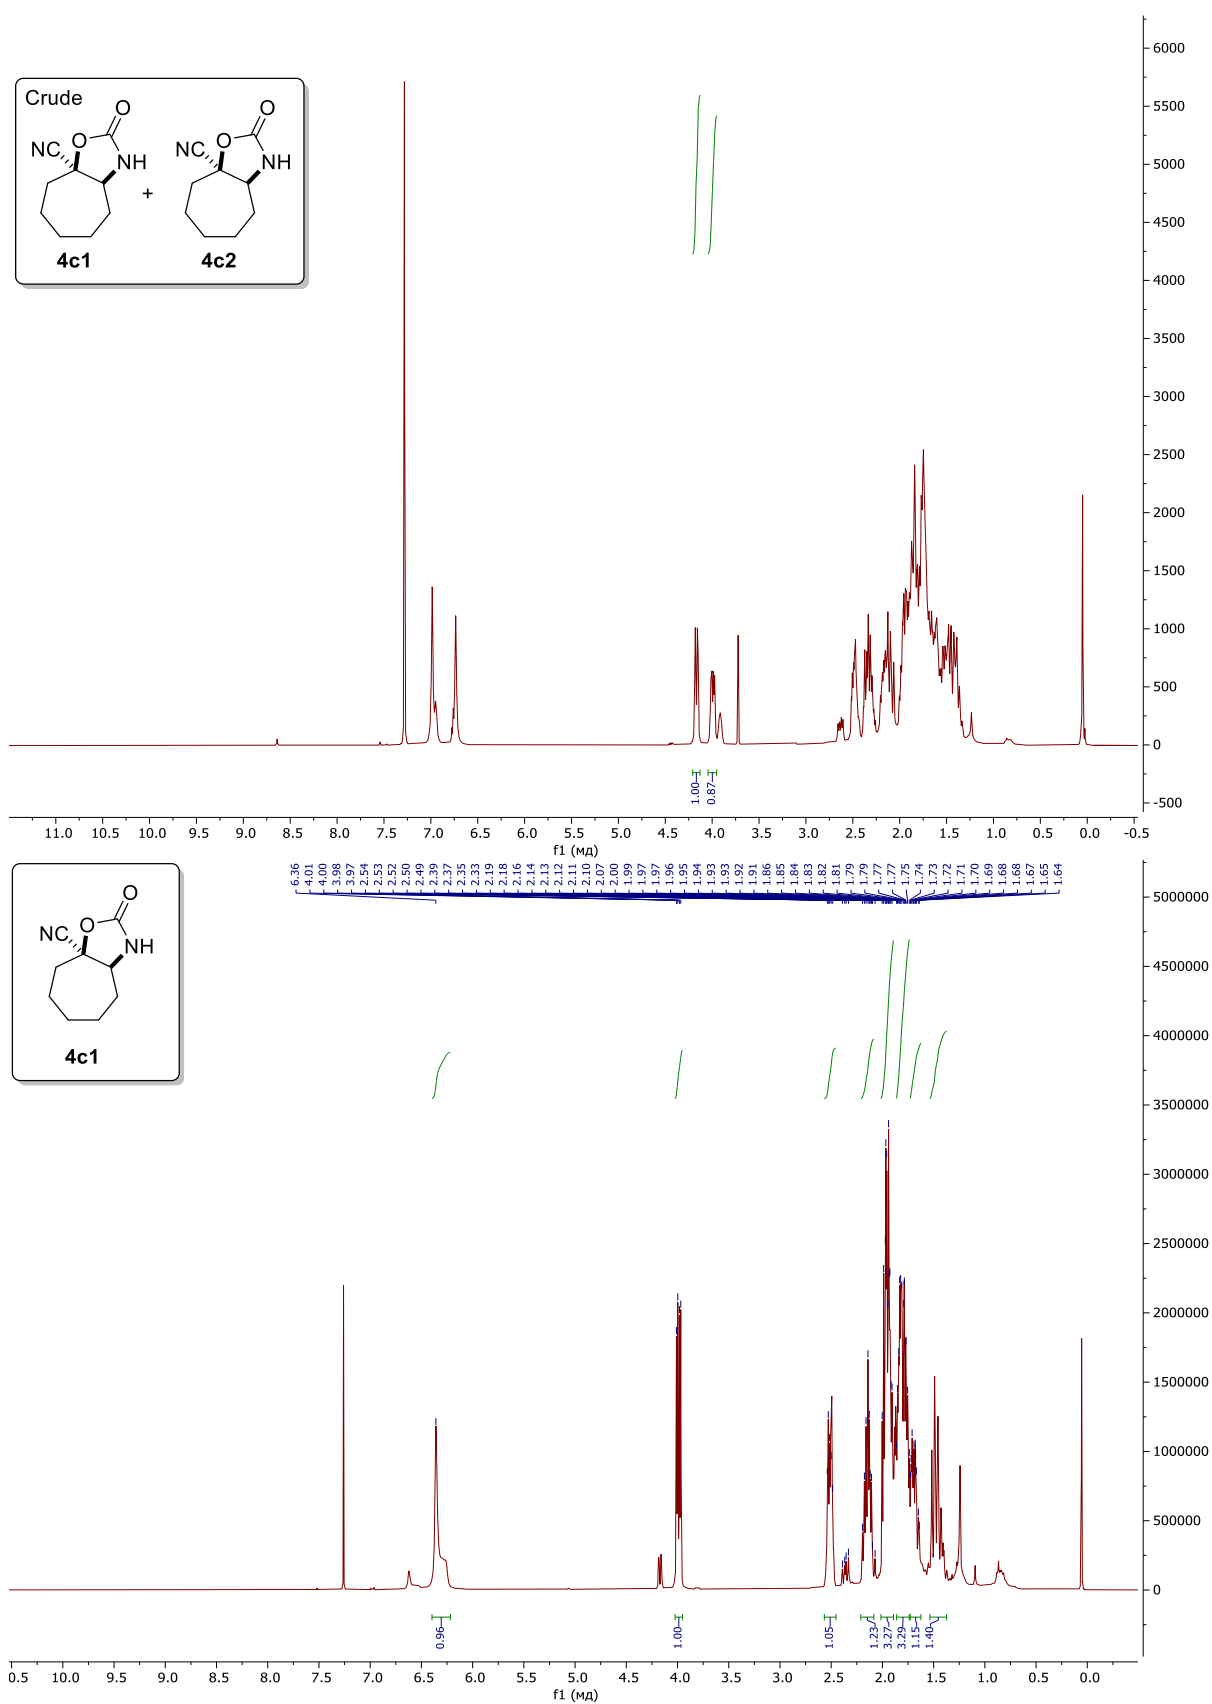

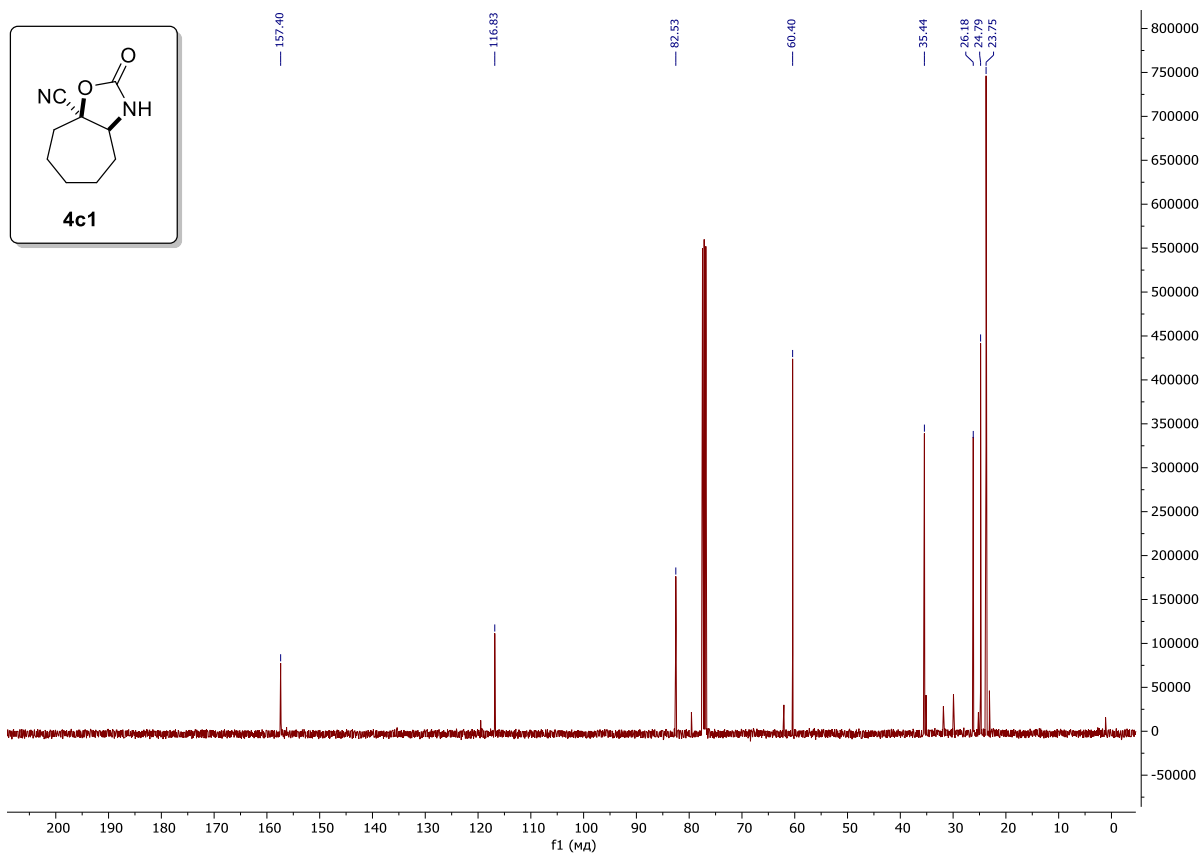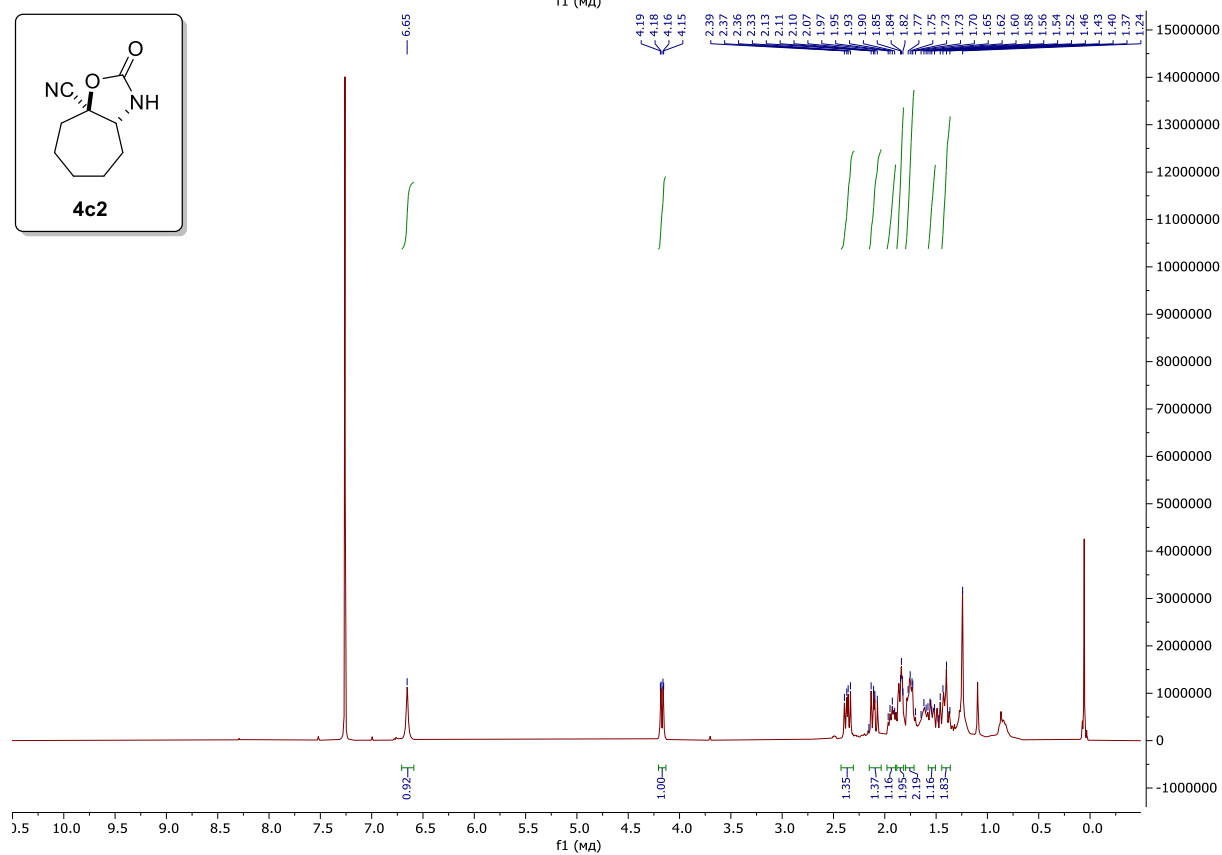

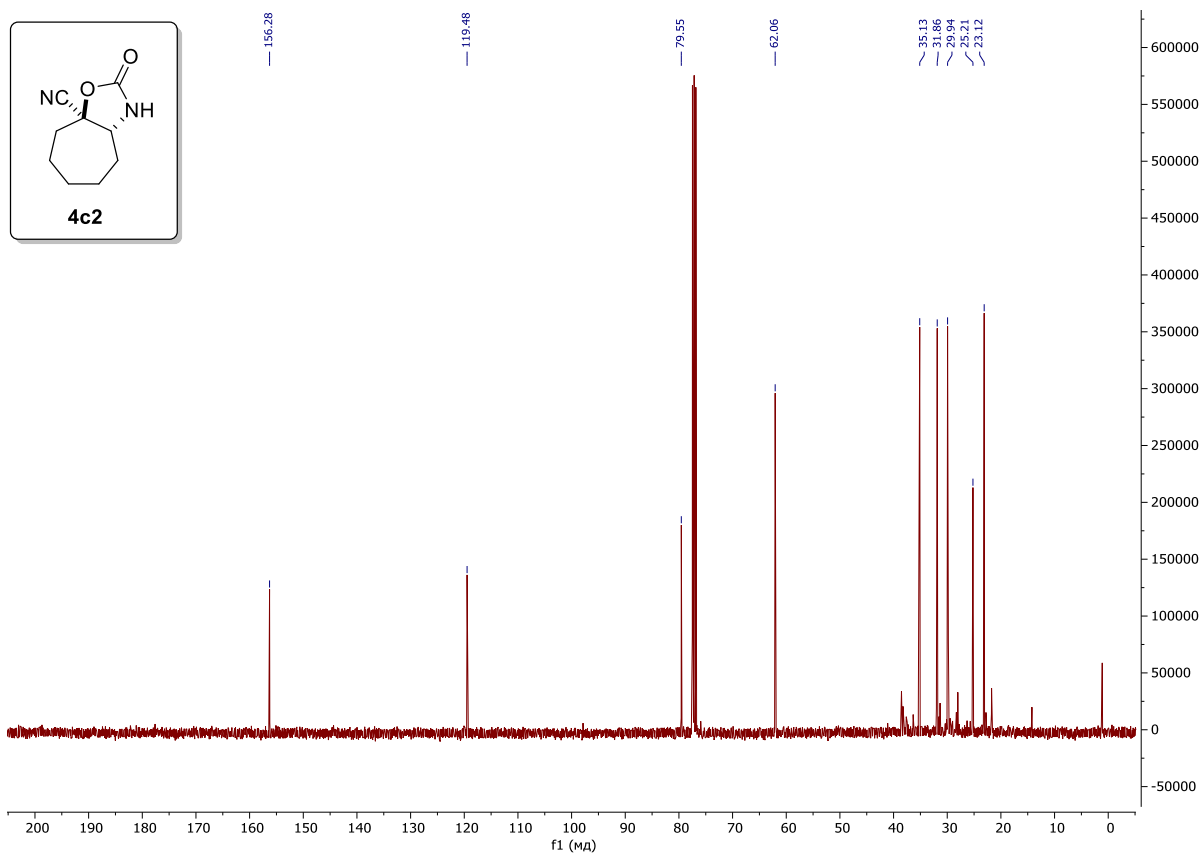

**Compound 4d**

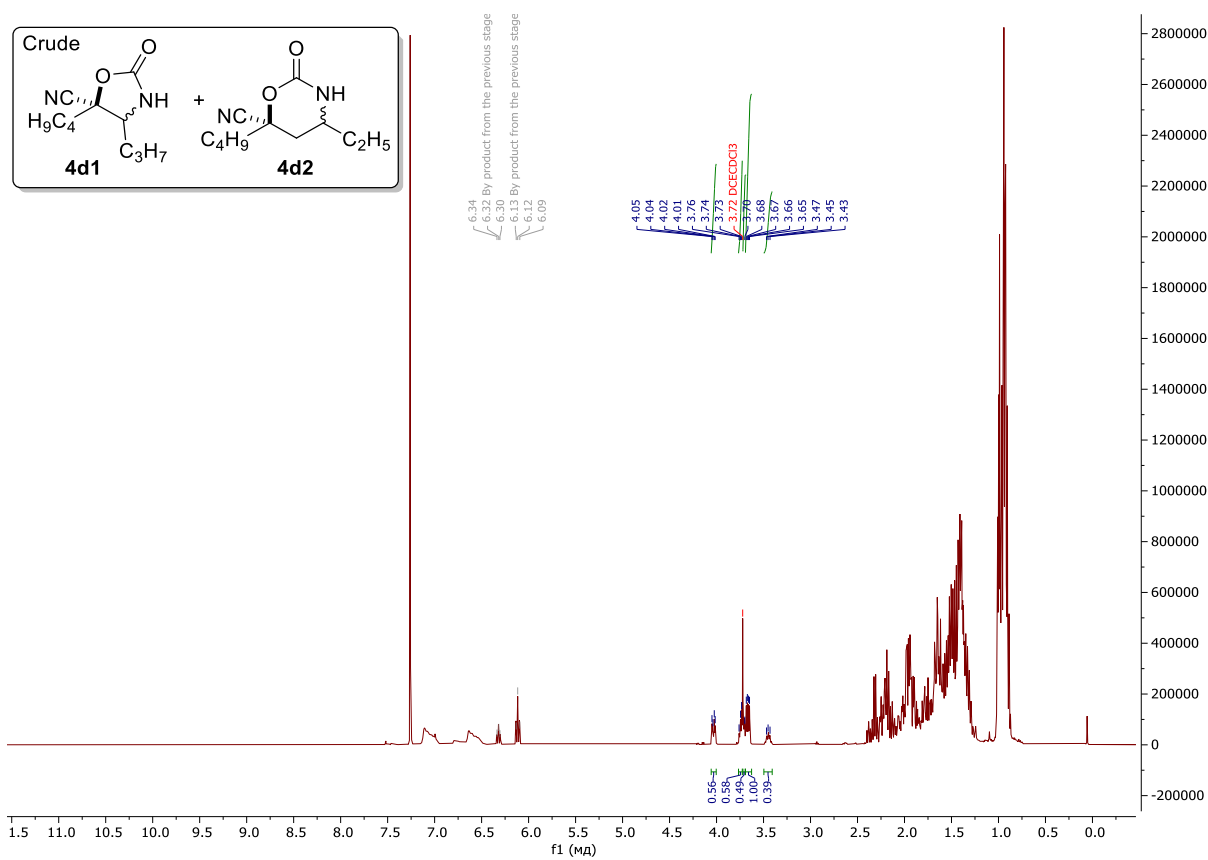

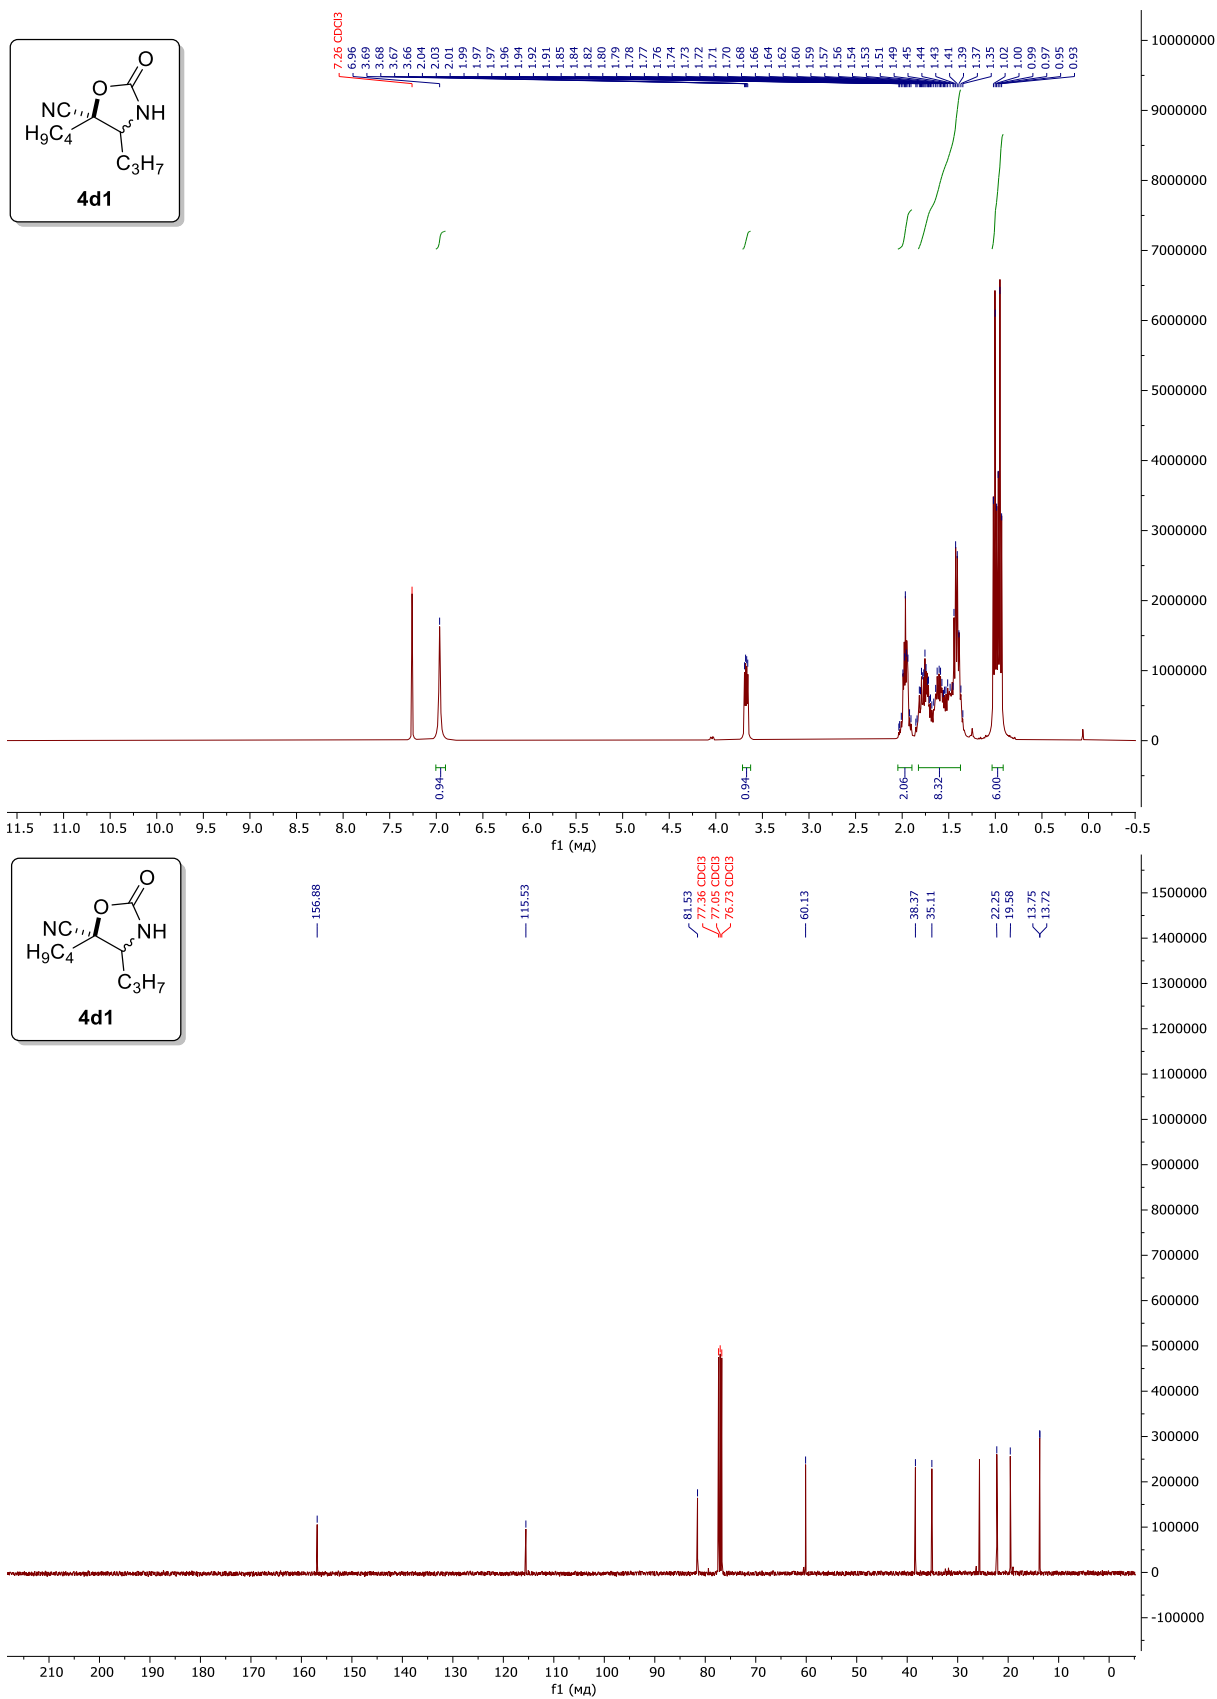

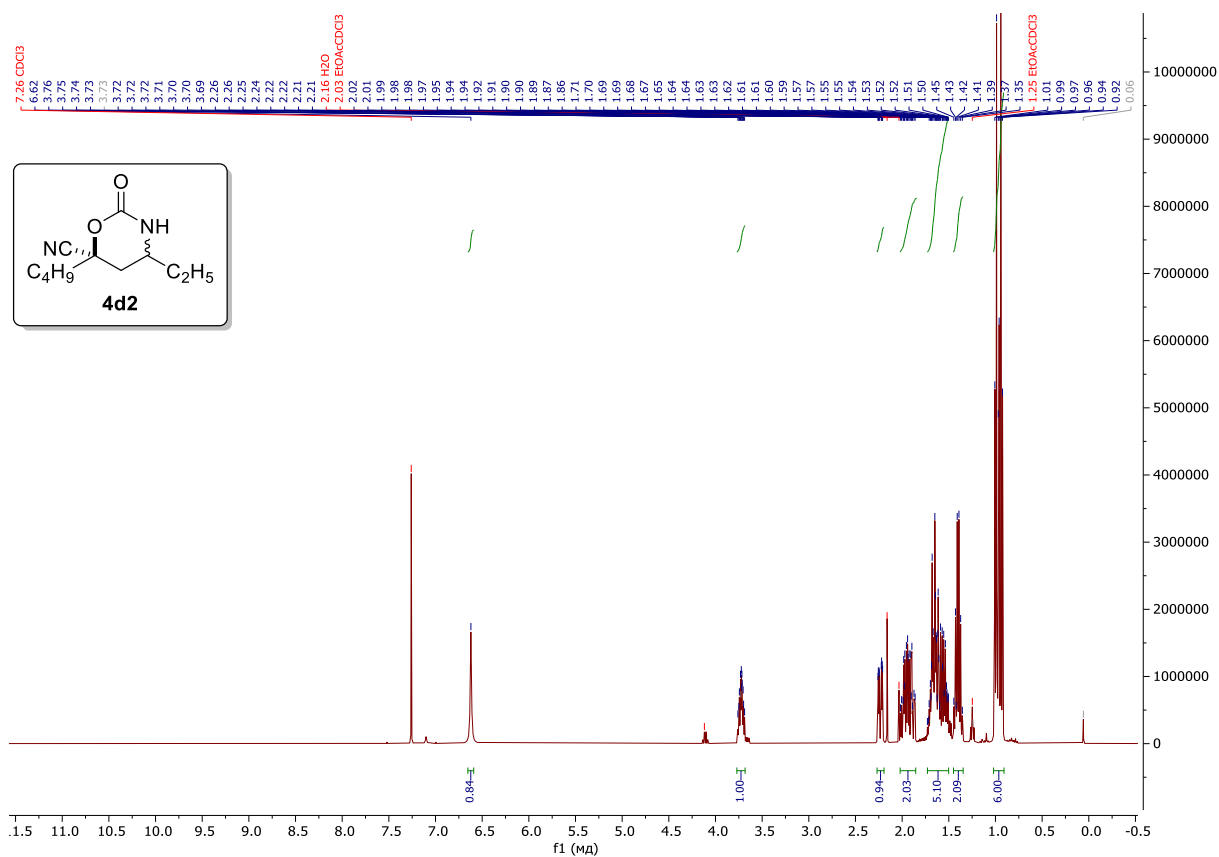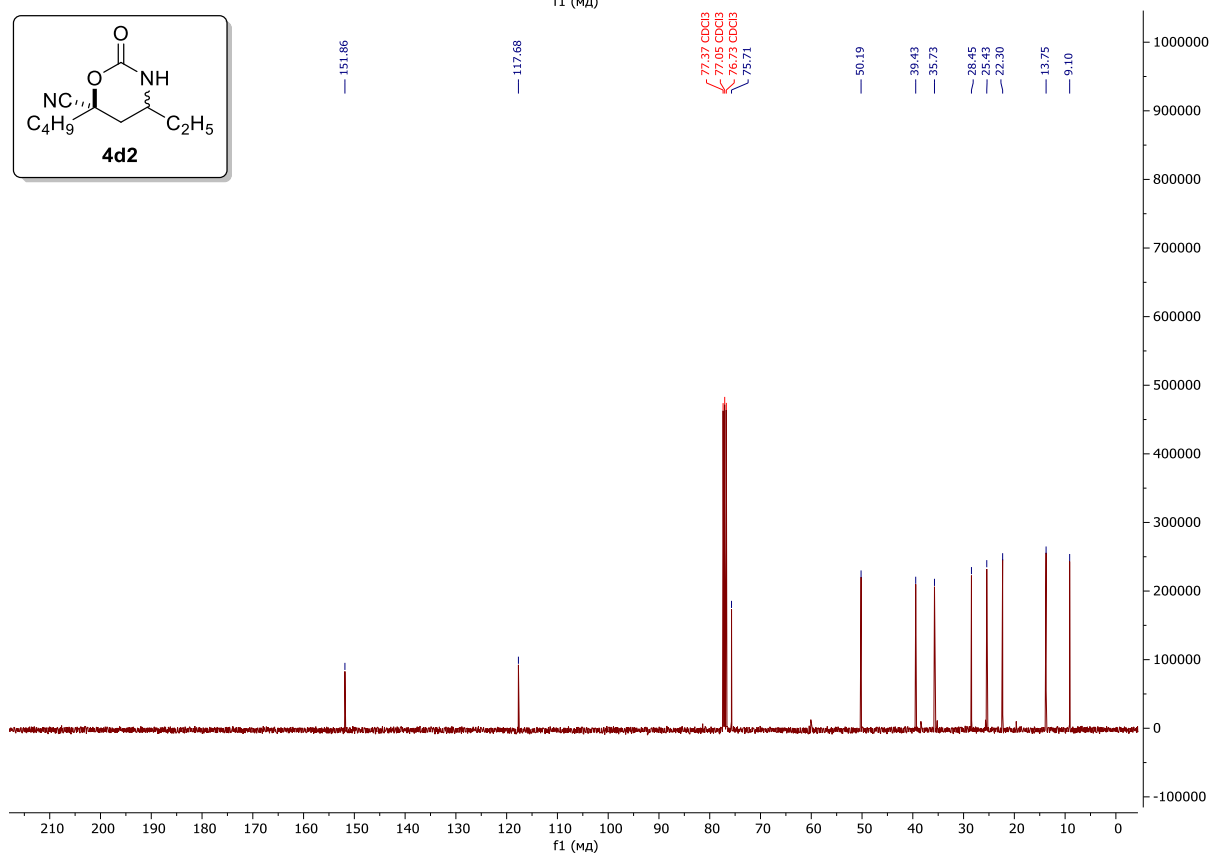

# Compound 4e

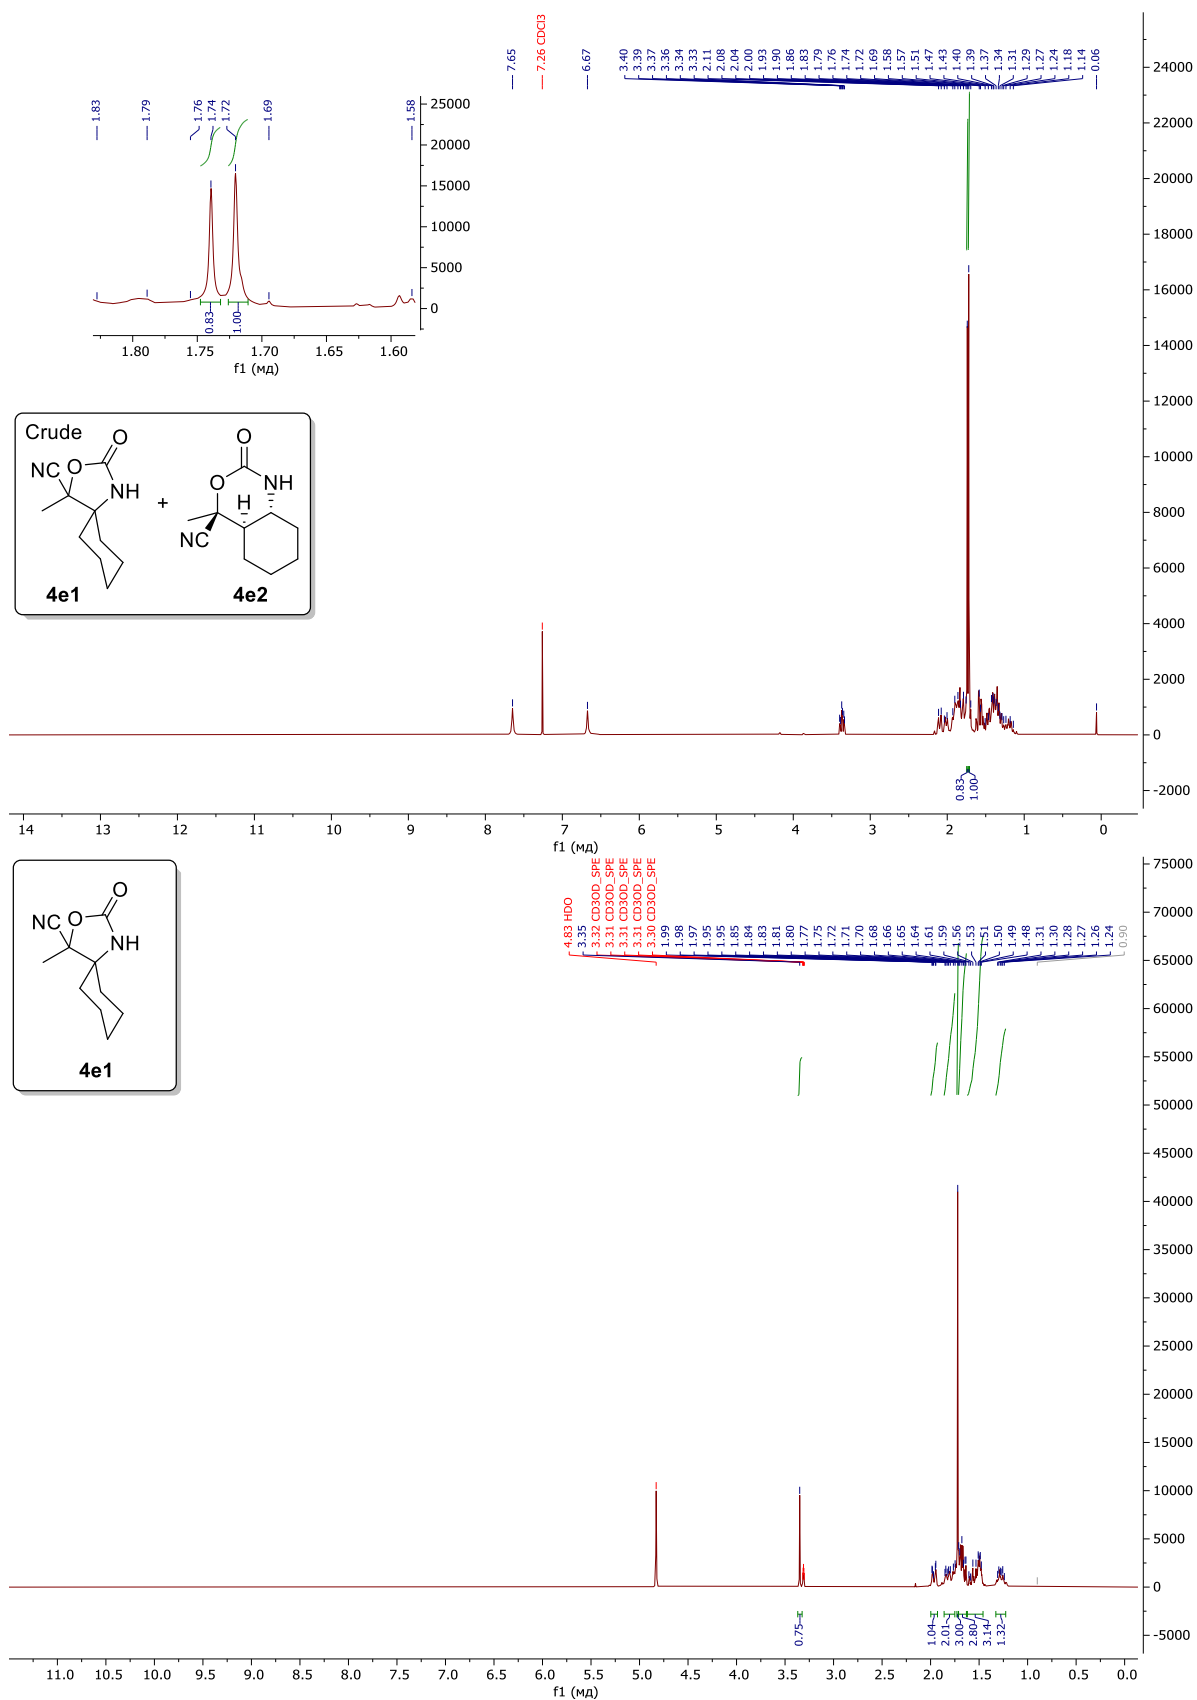

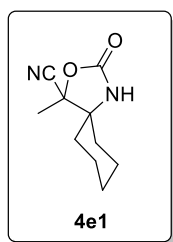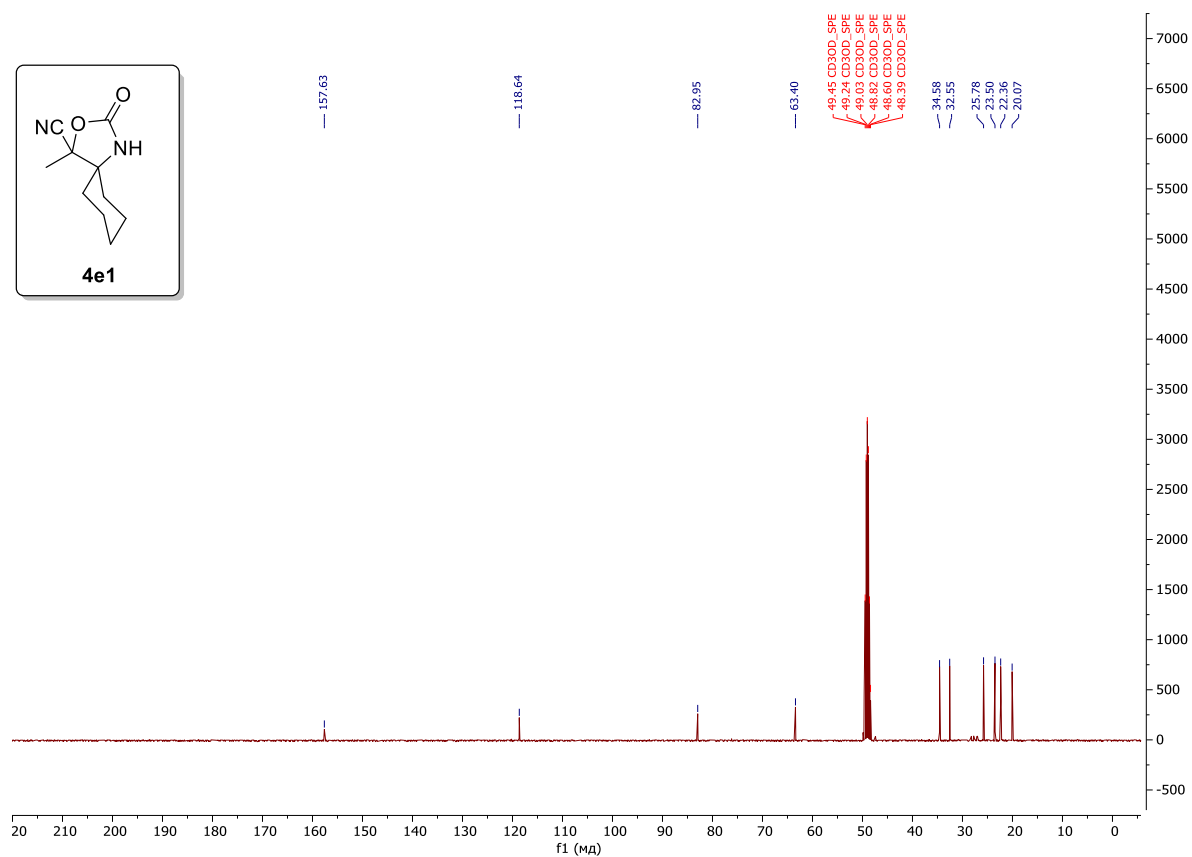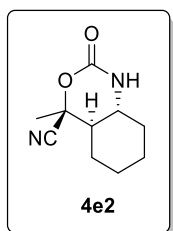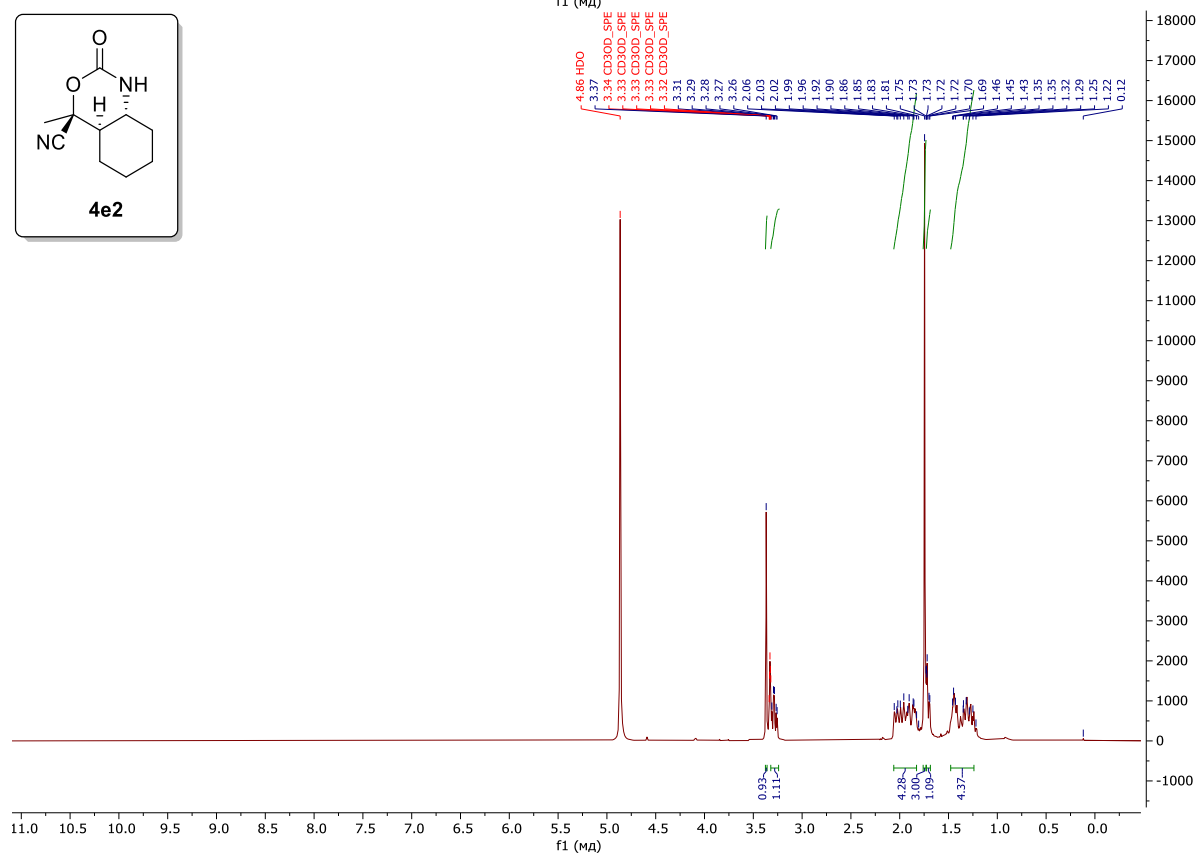

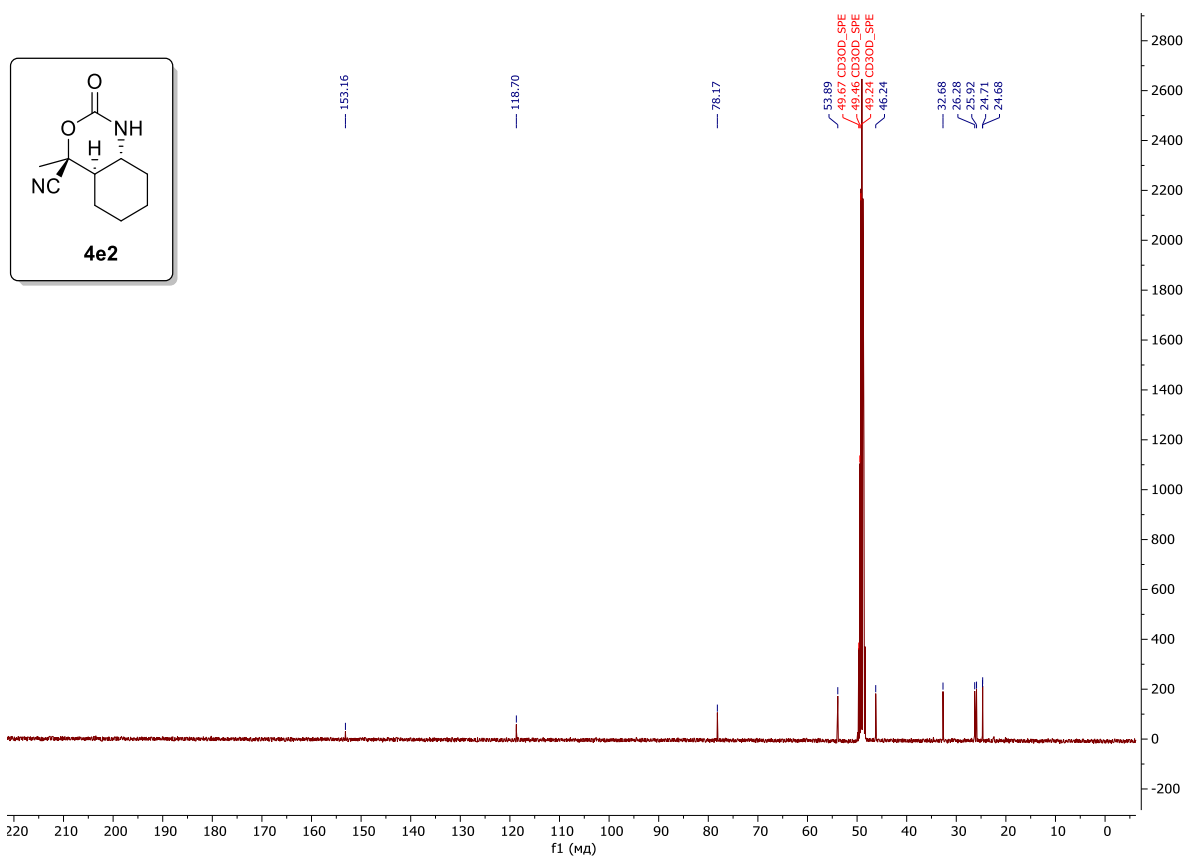

**Compound 4f**

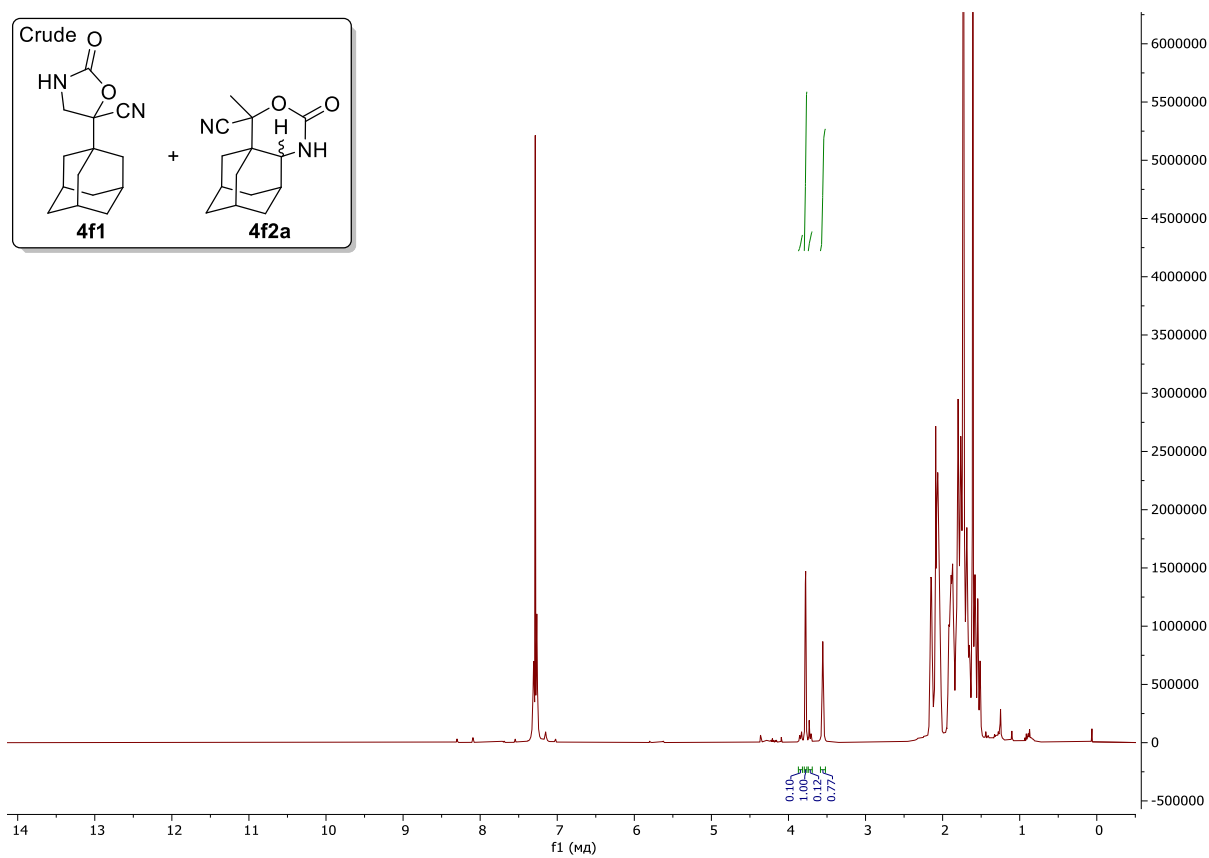

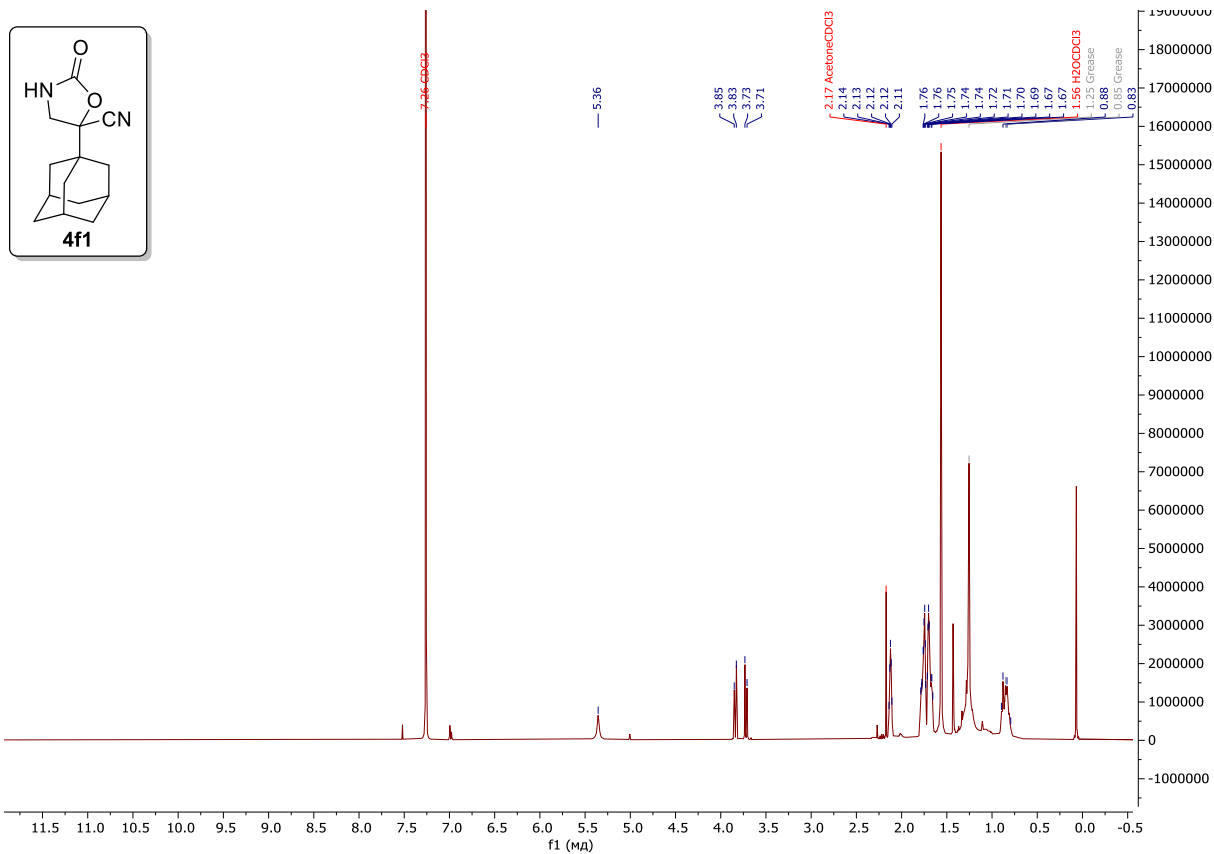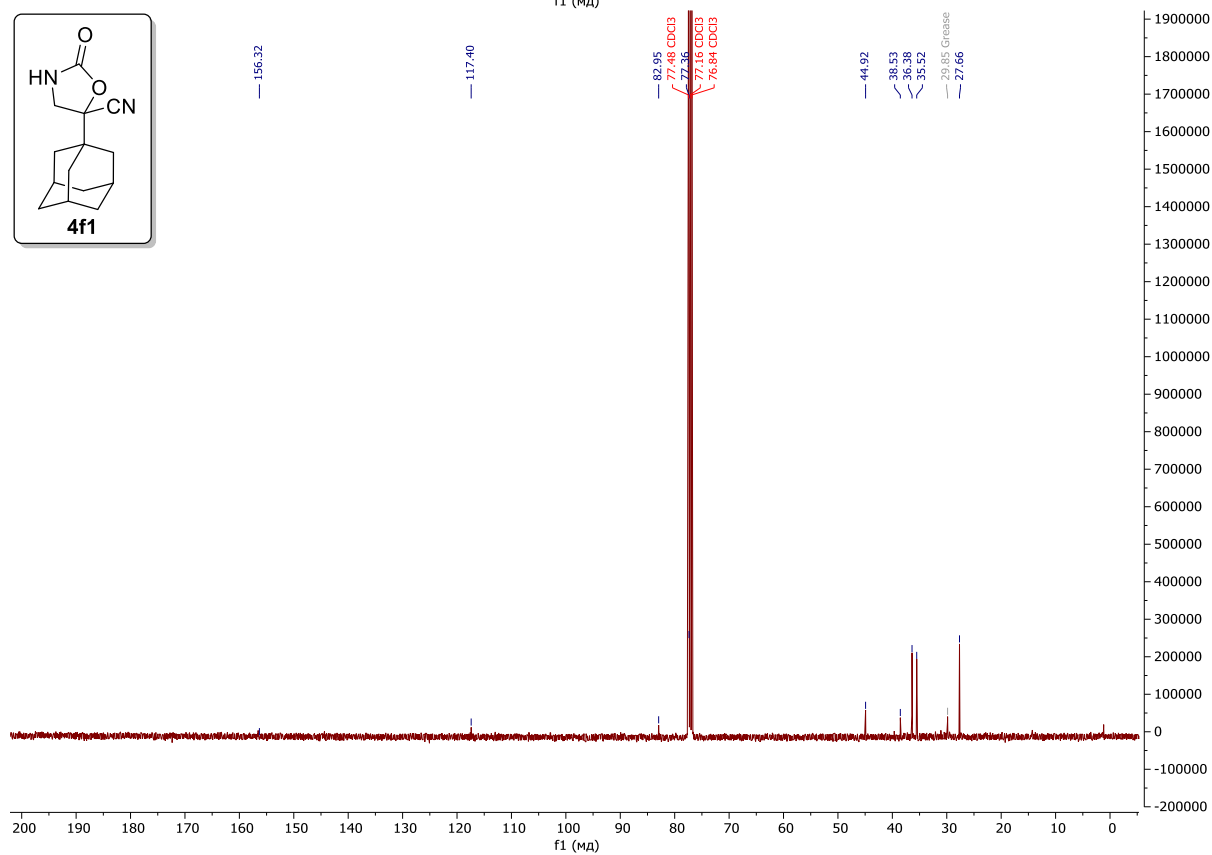

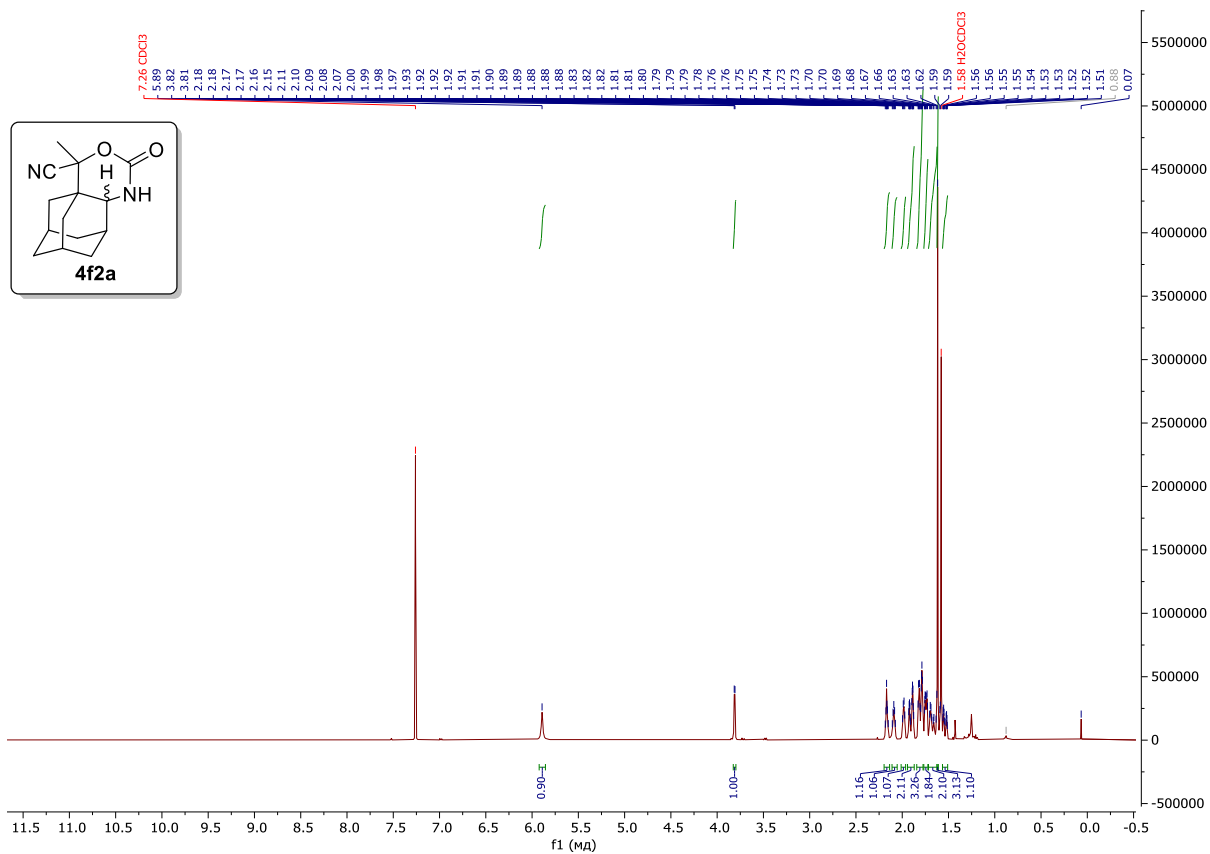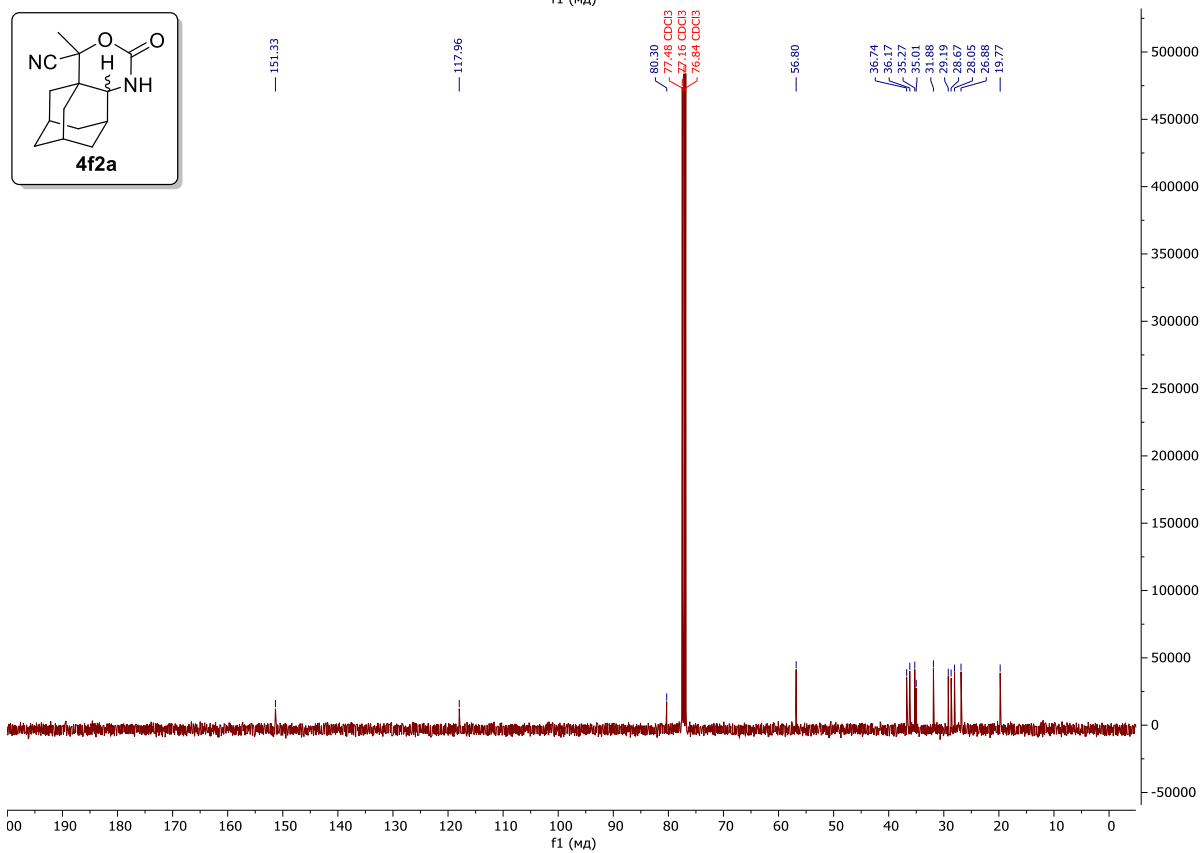

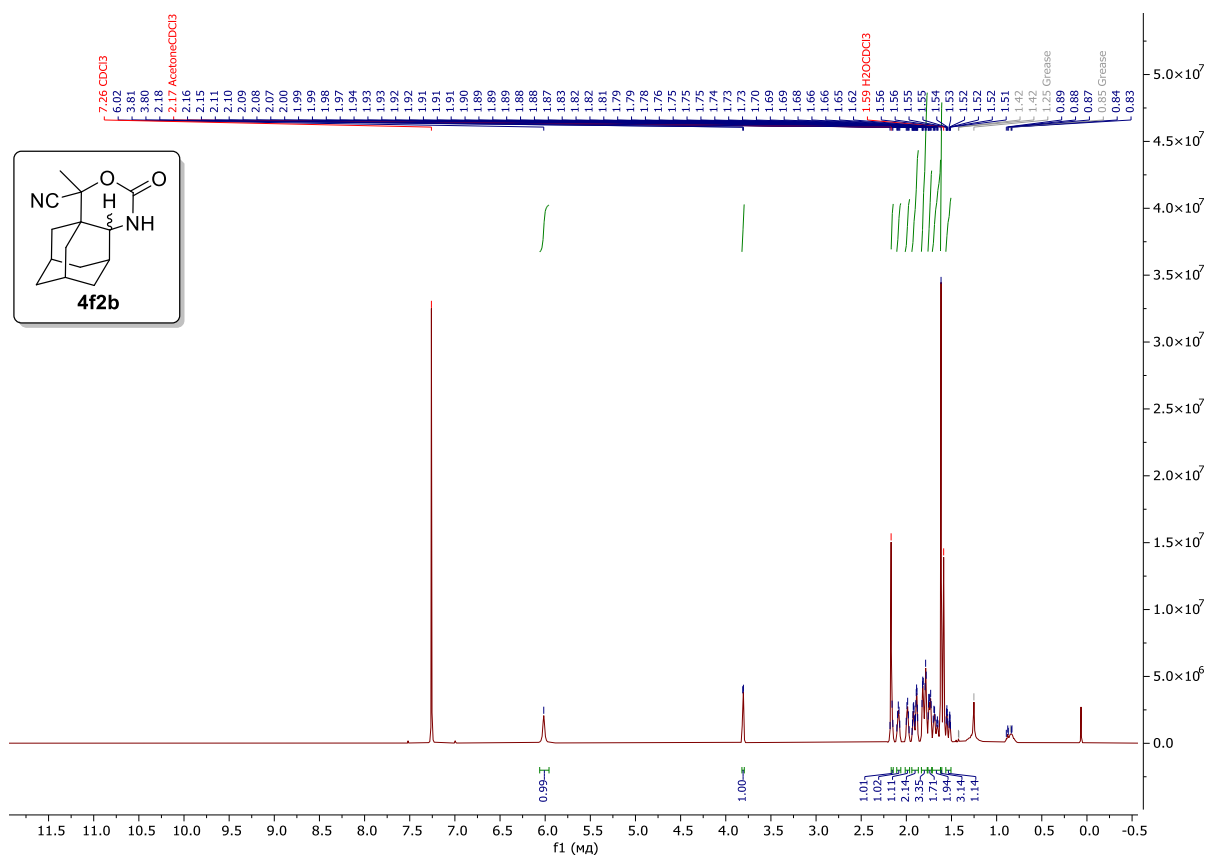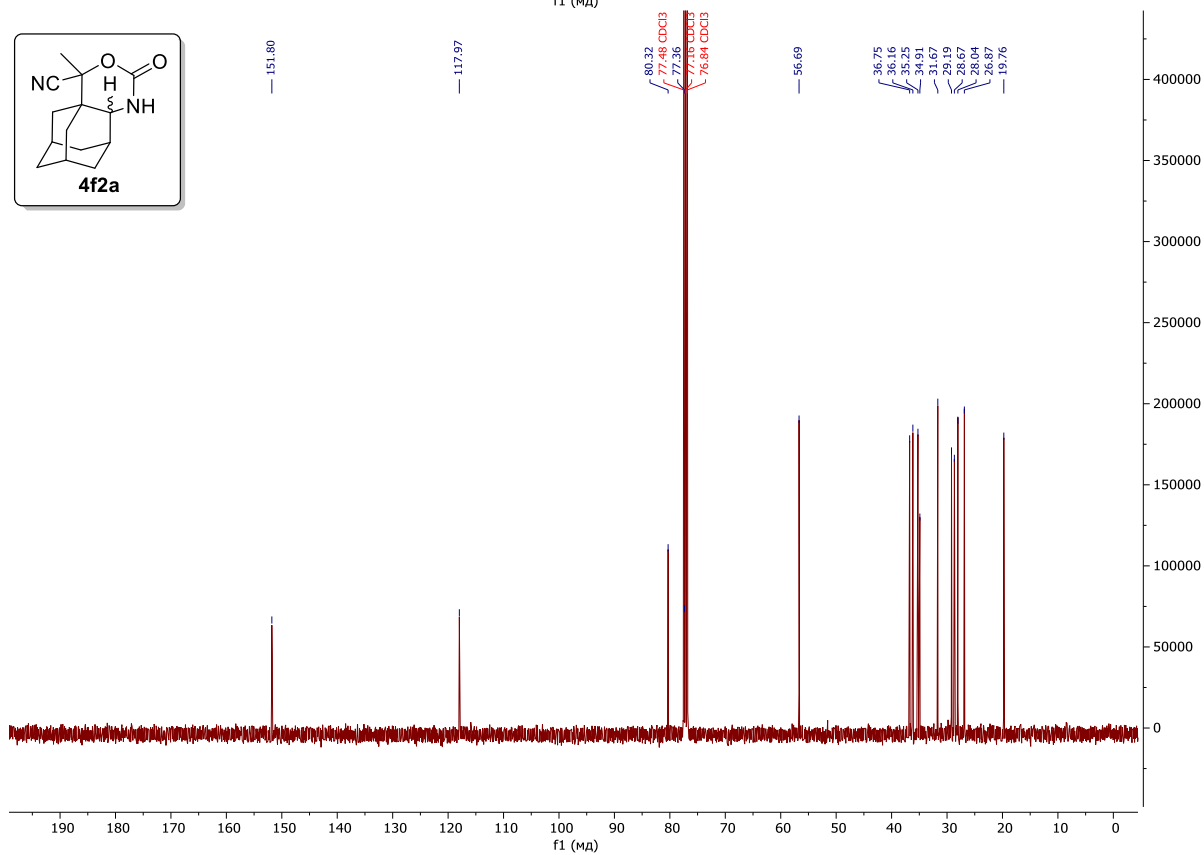

# Compound 4g

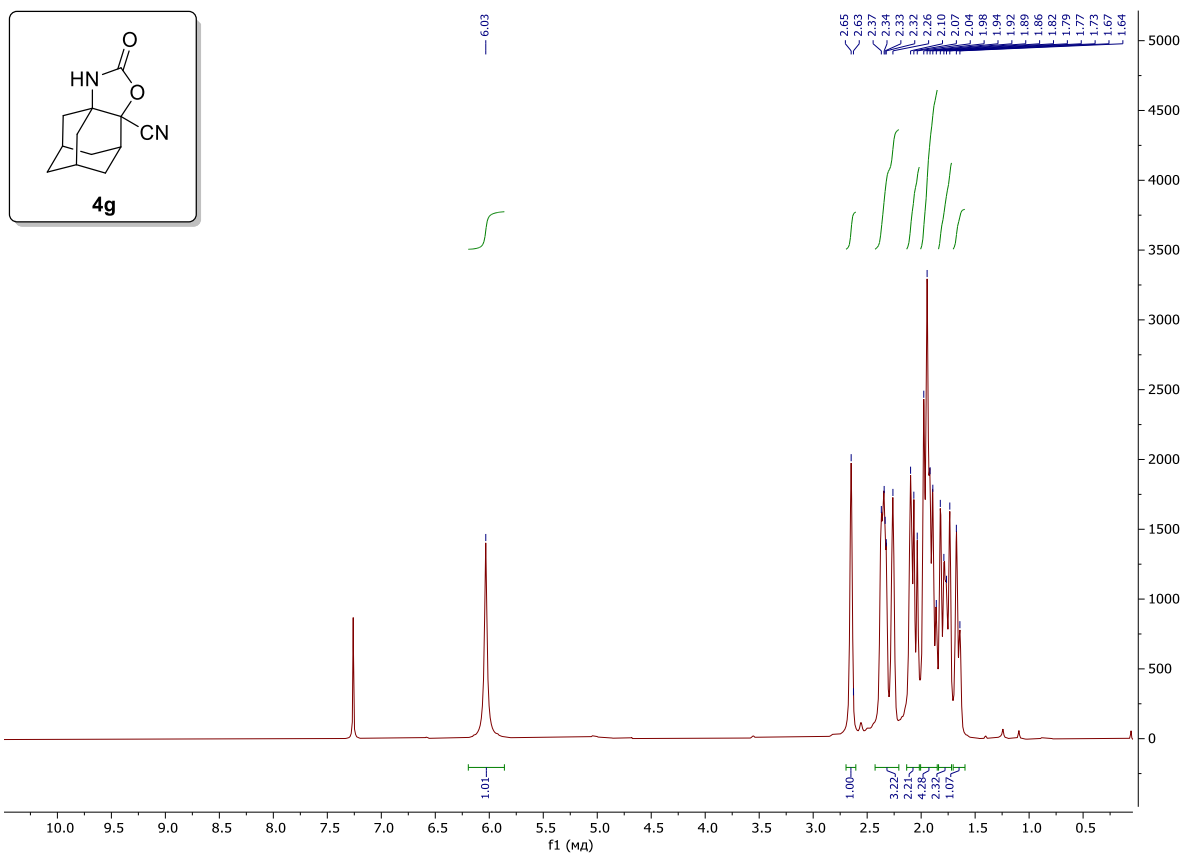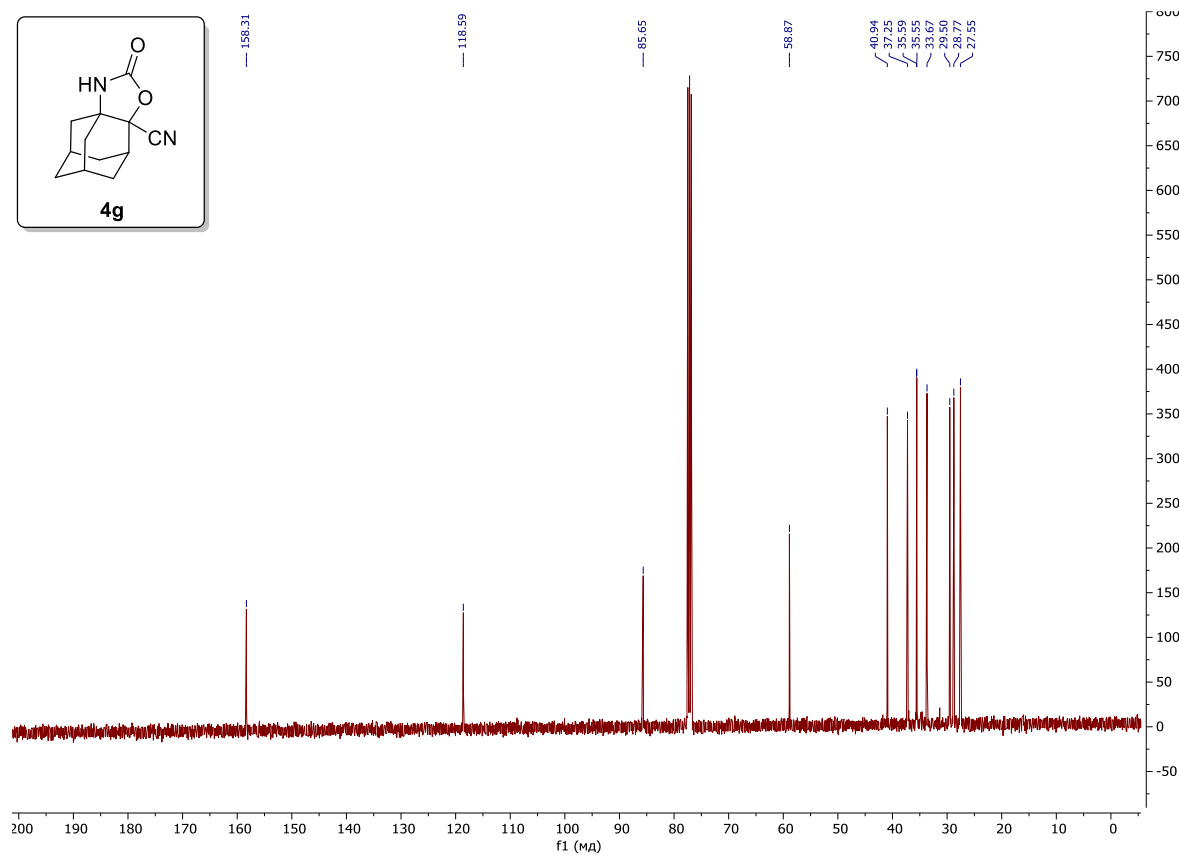

## Compound 4h

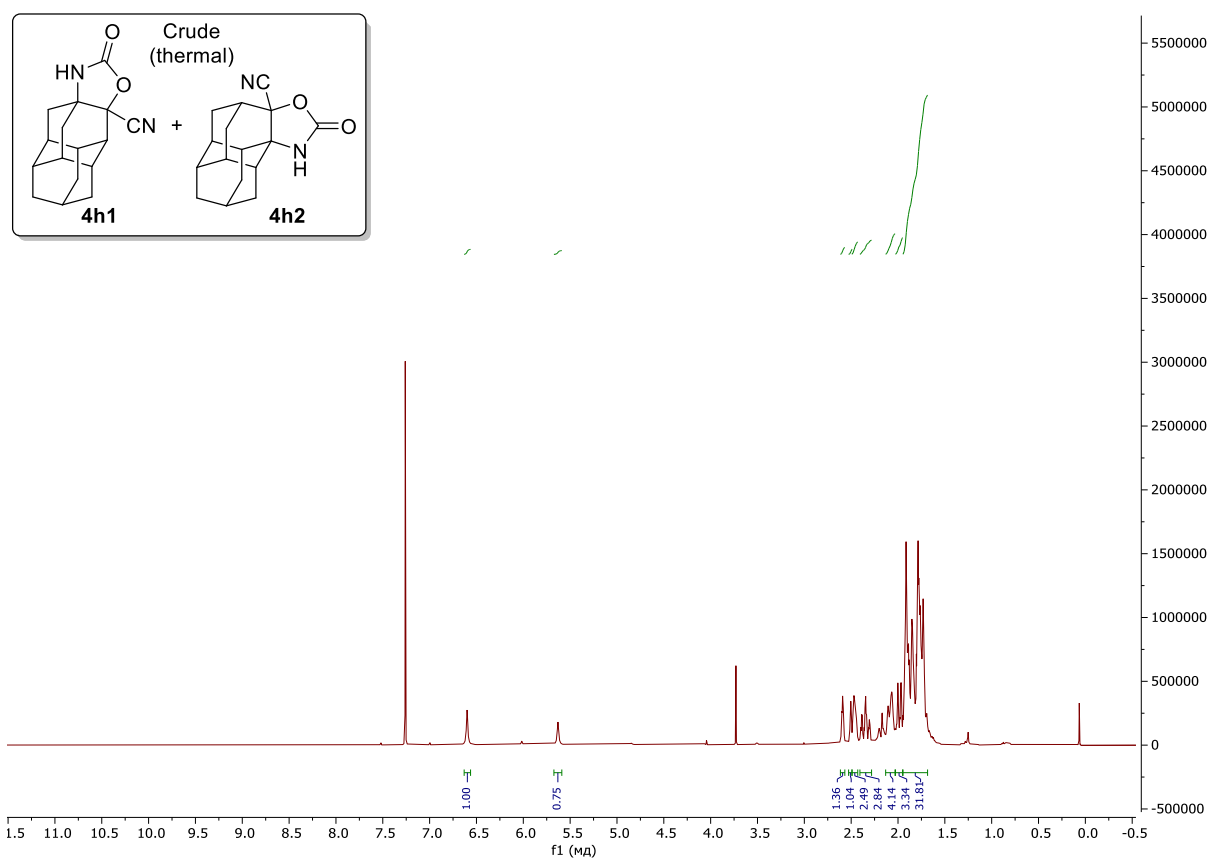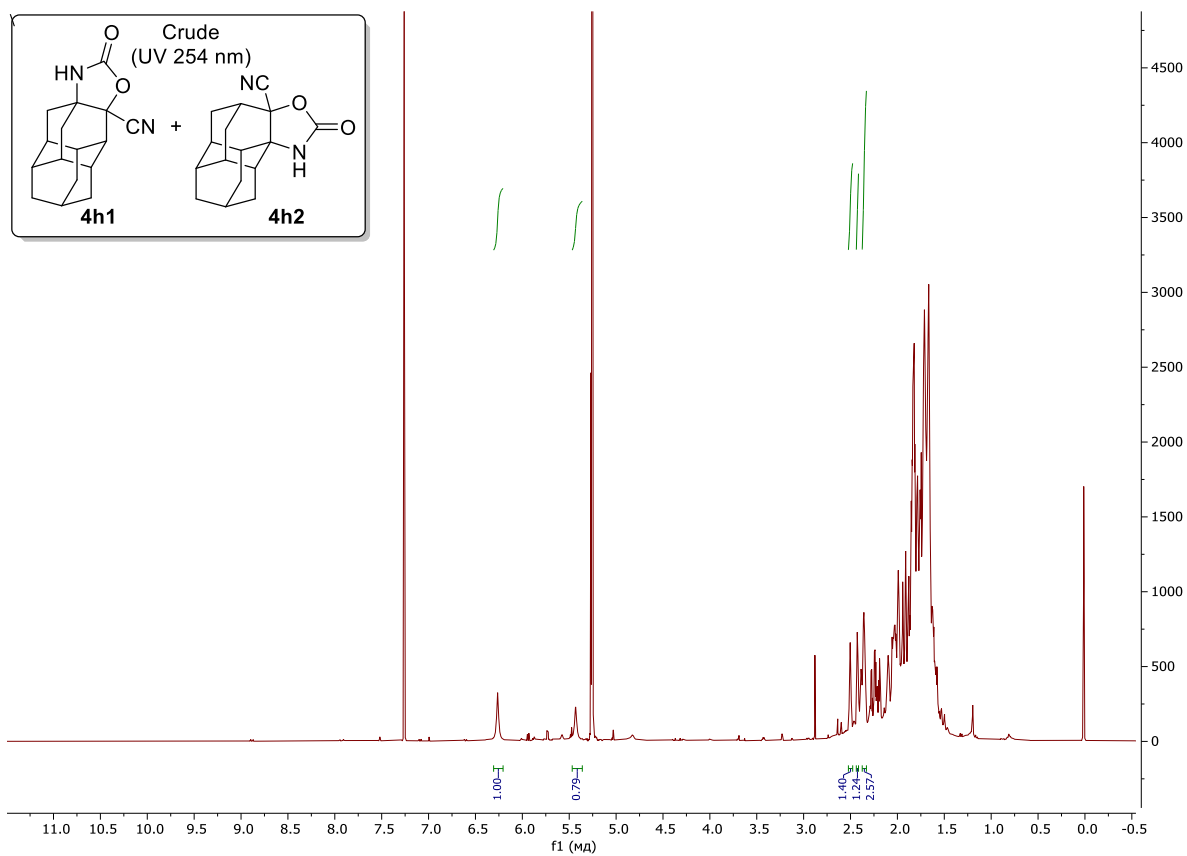

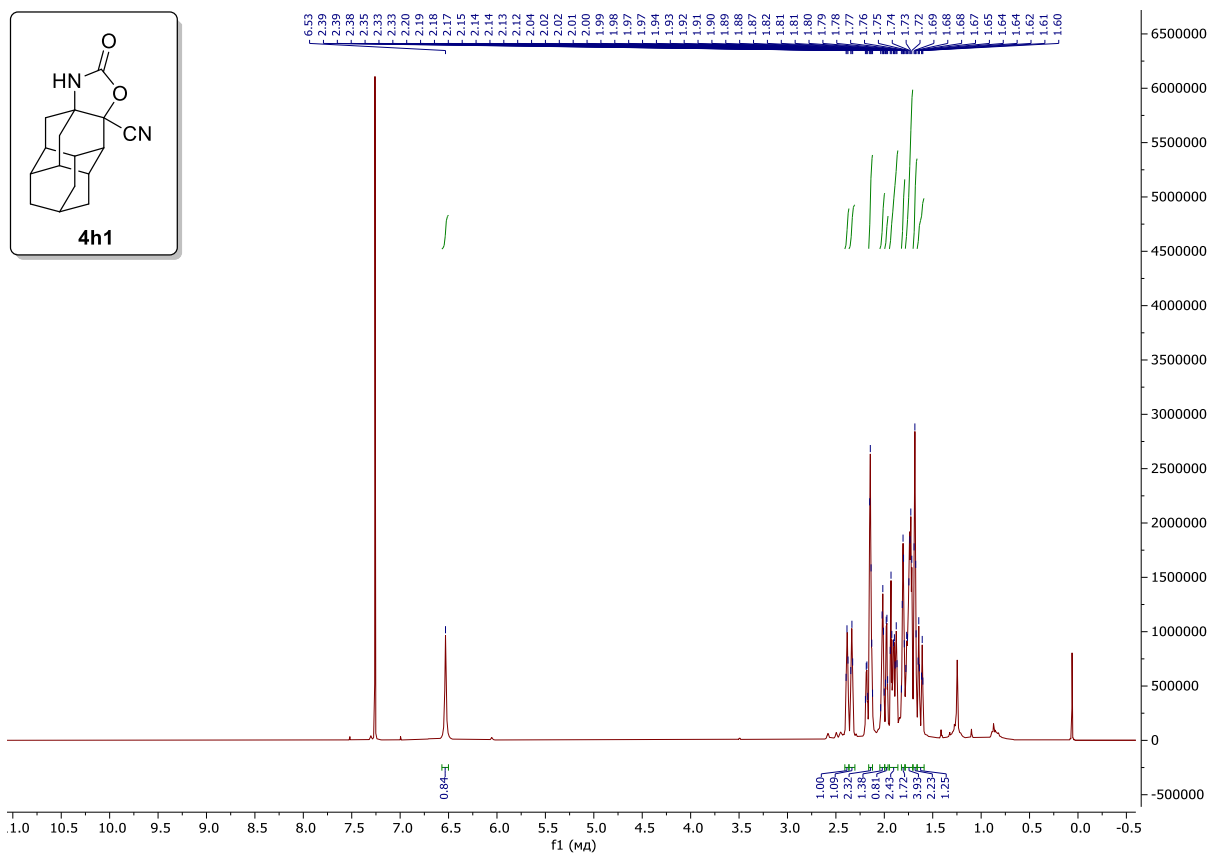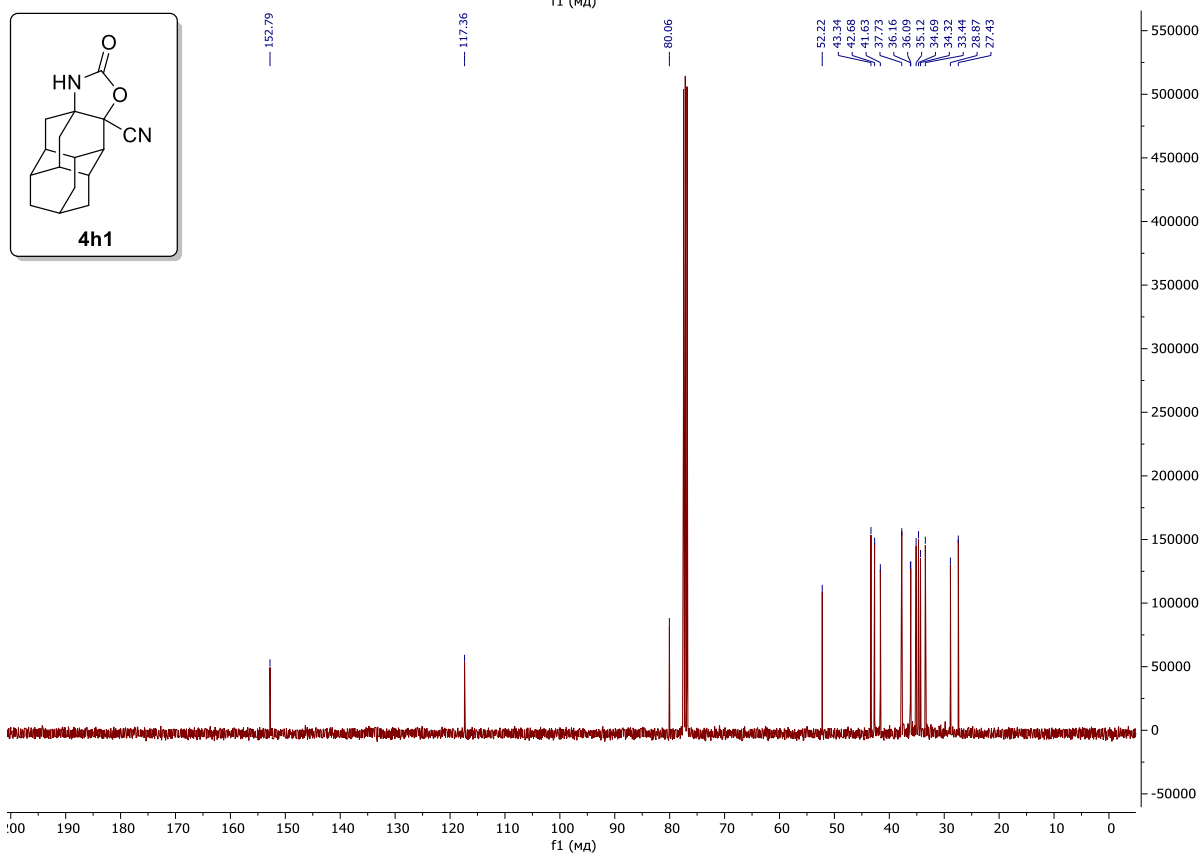

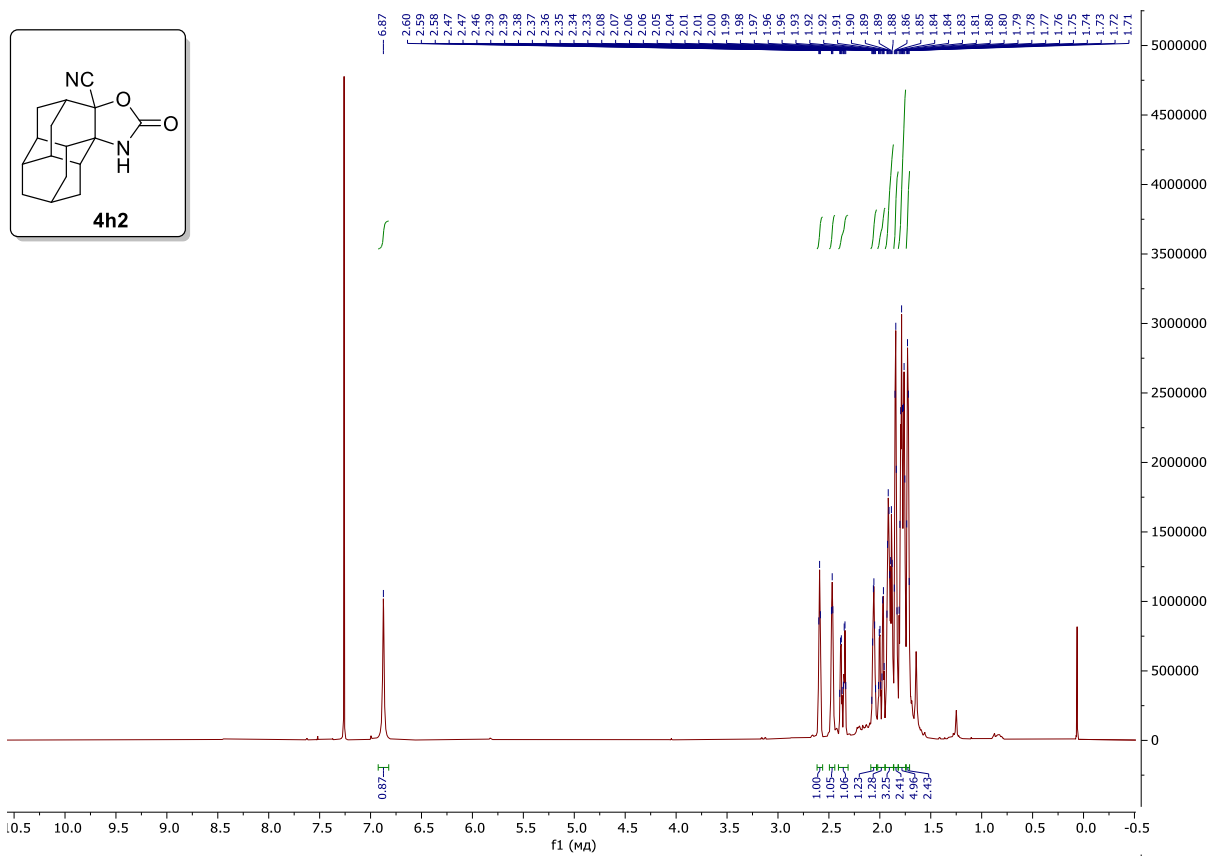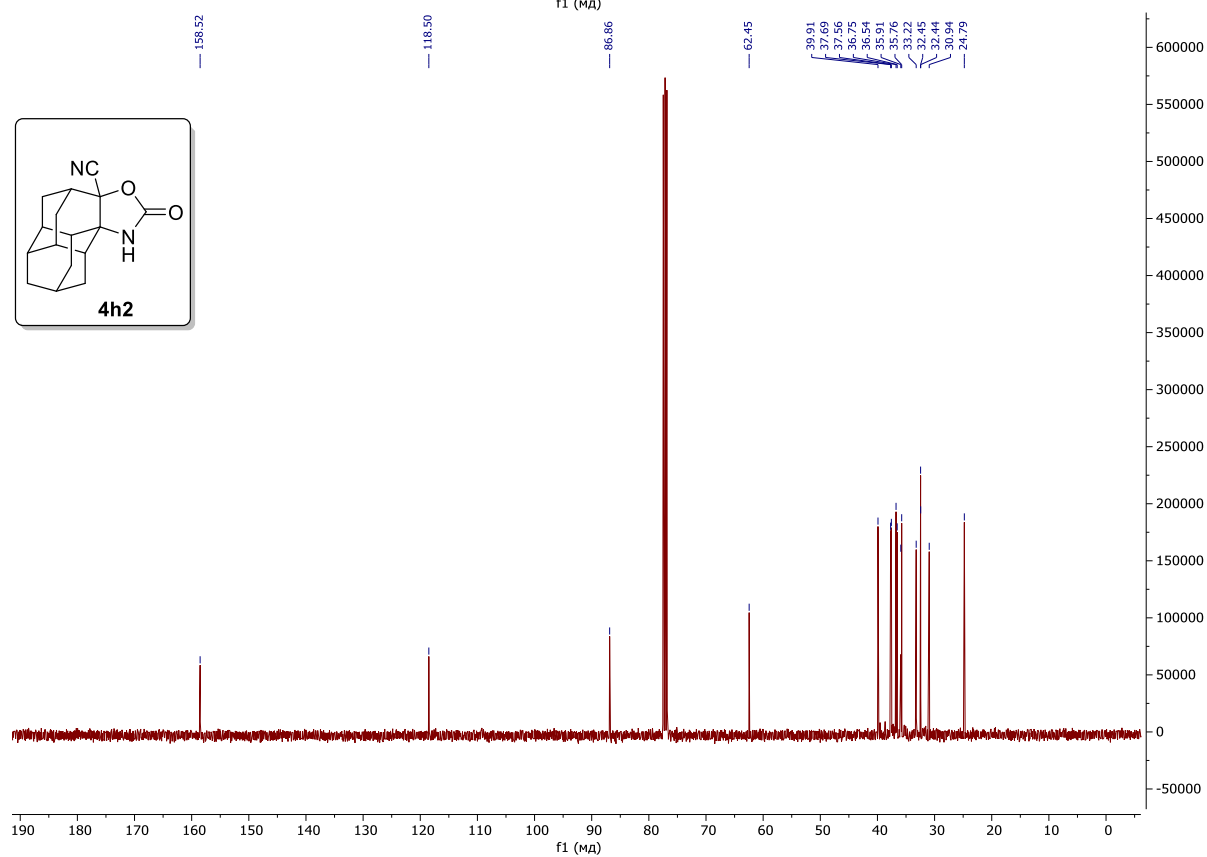

# Compound 5

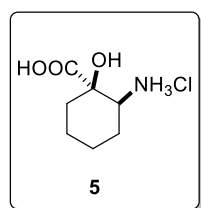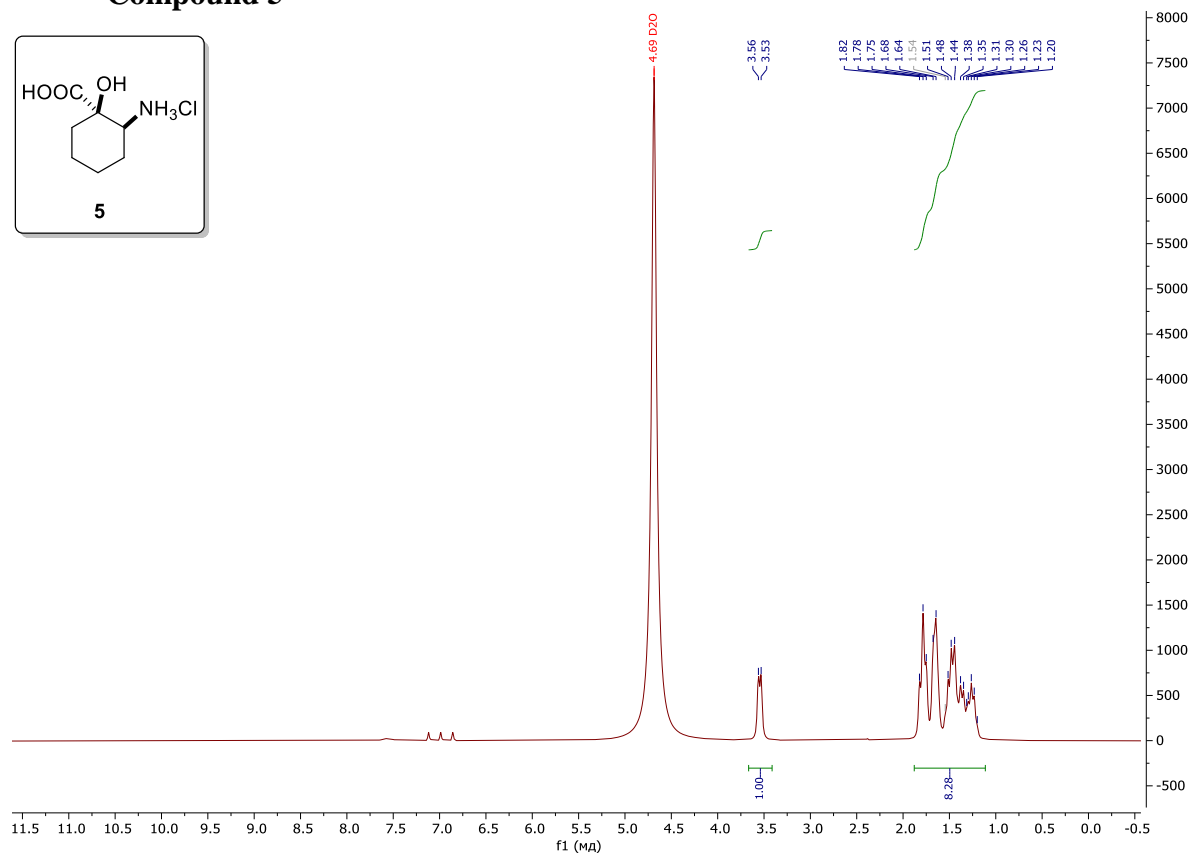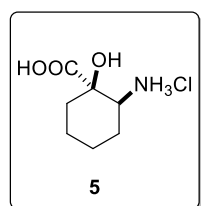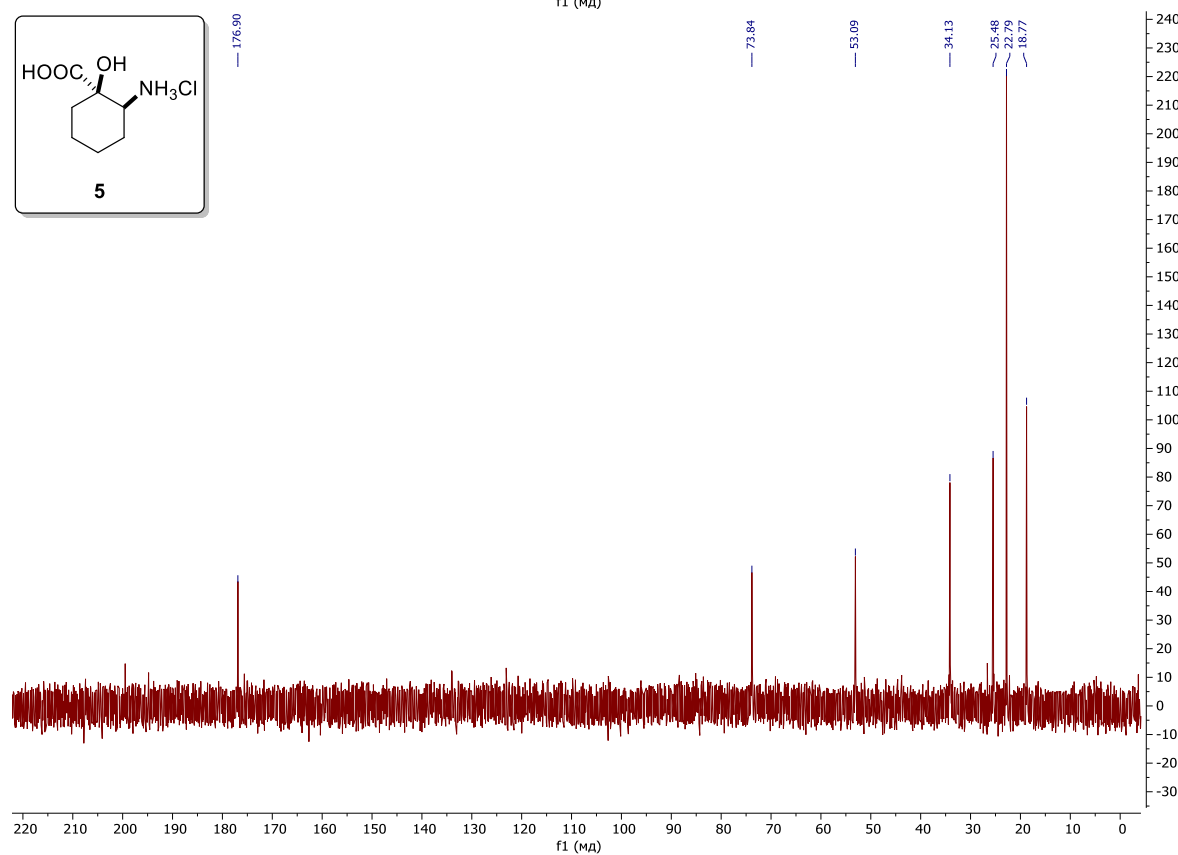

# Compound 6

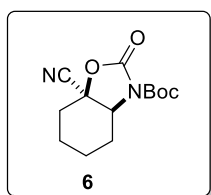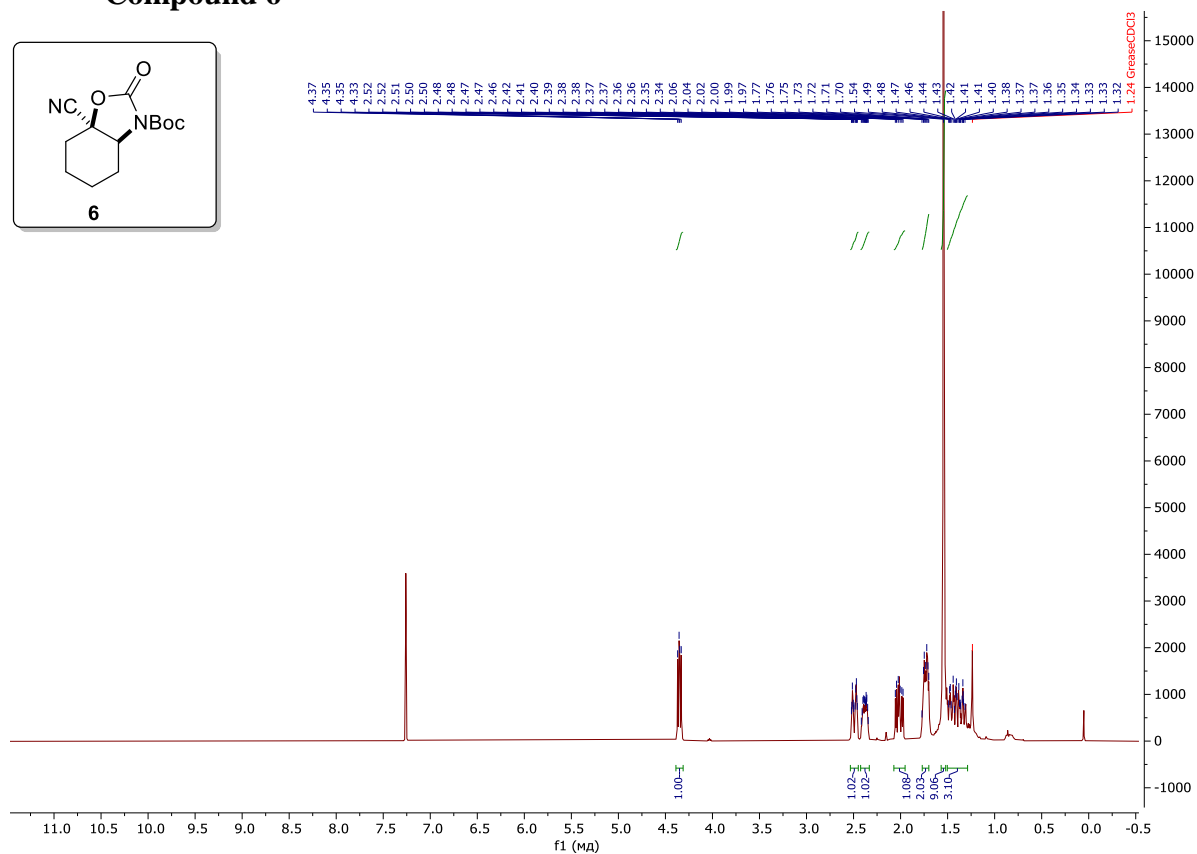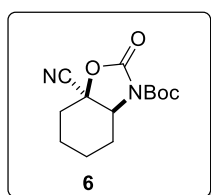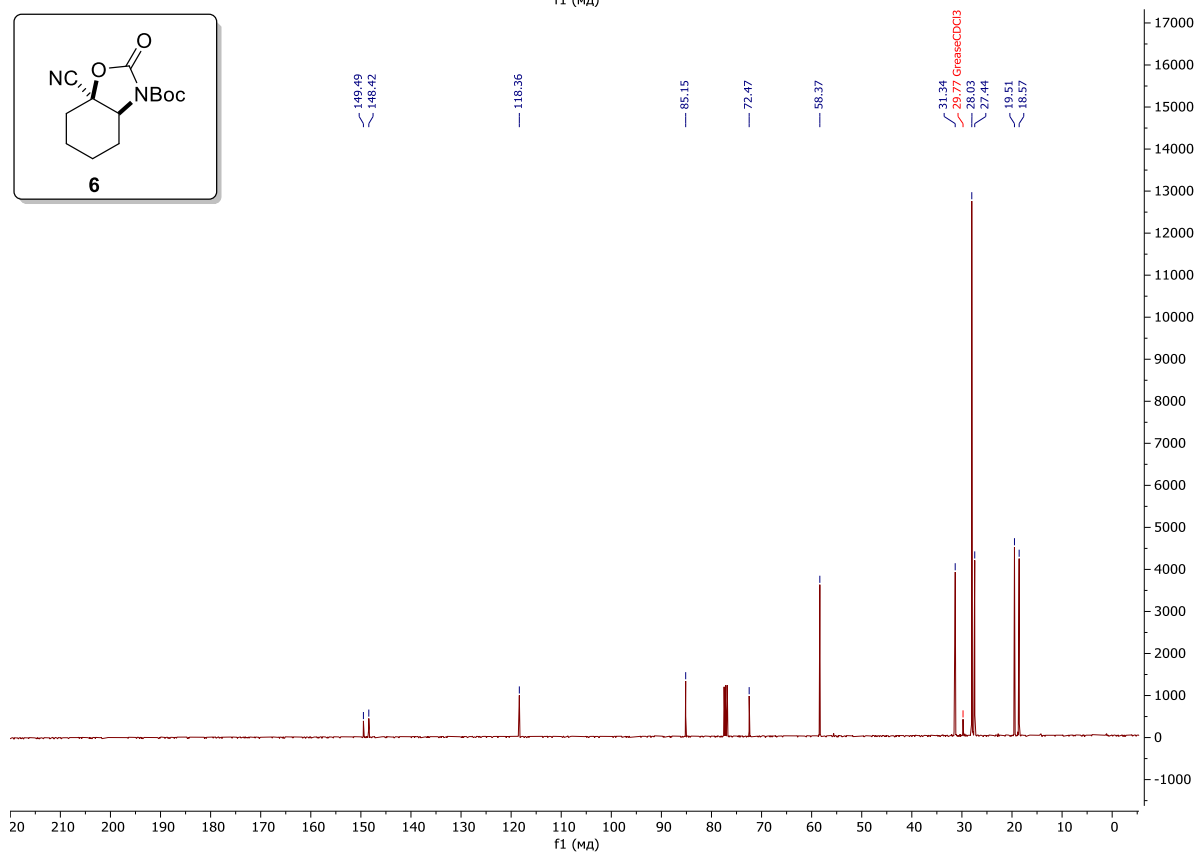

# Compound 7

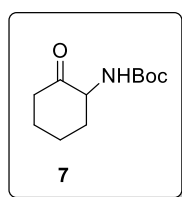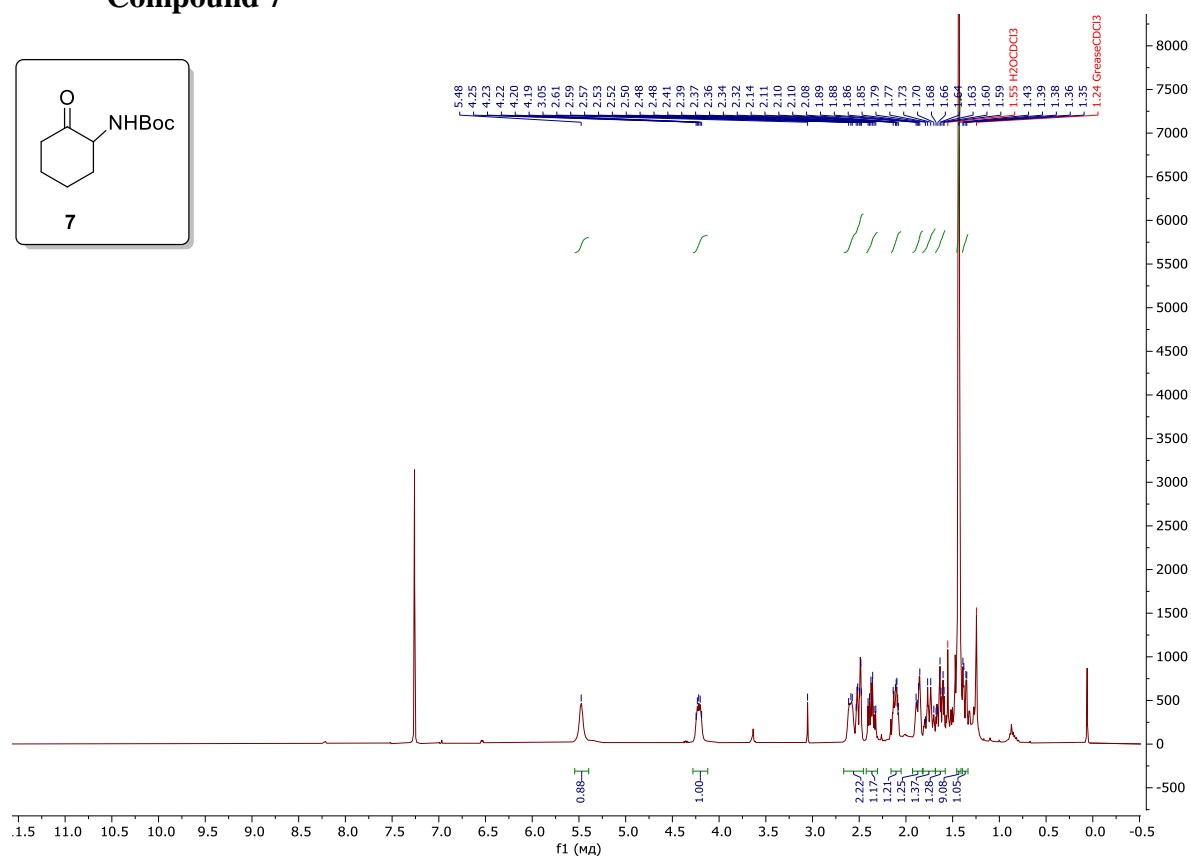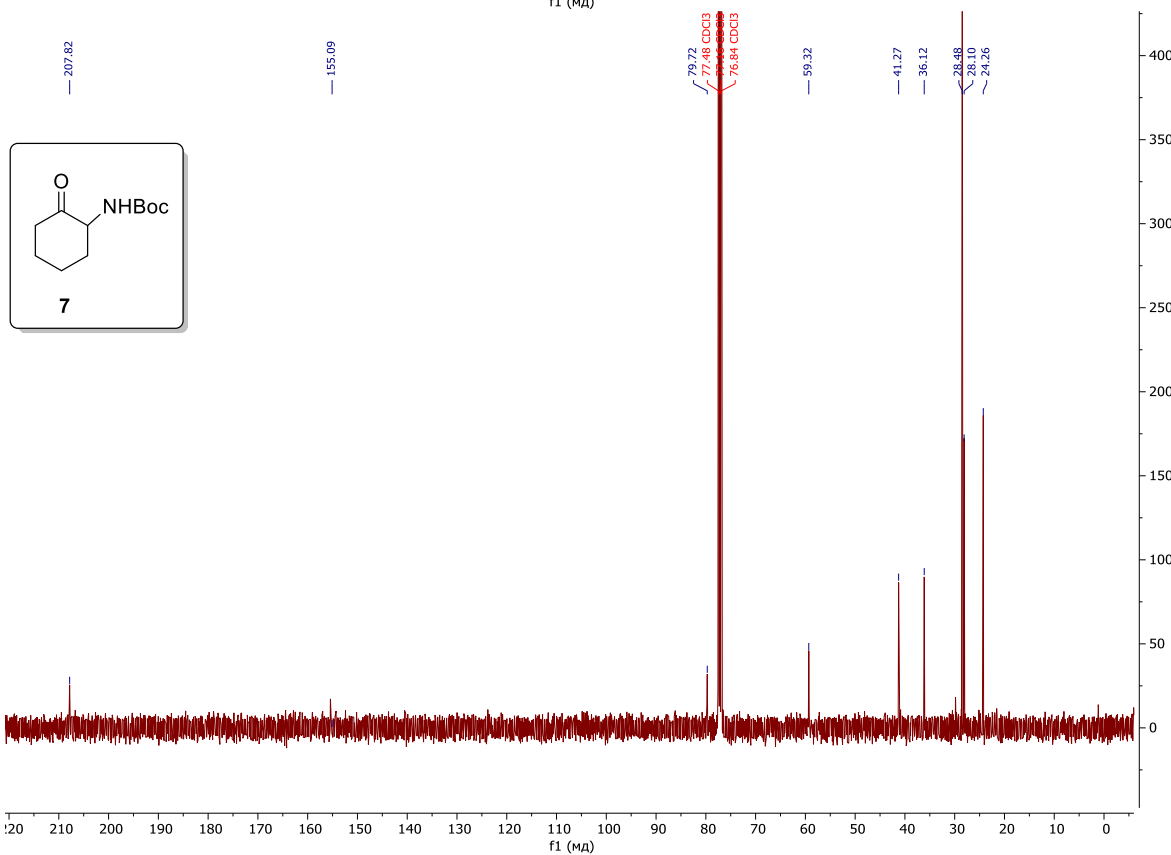

### Compound 8

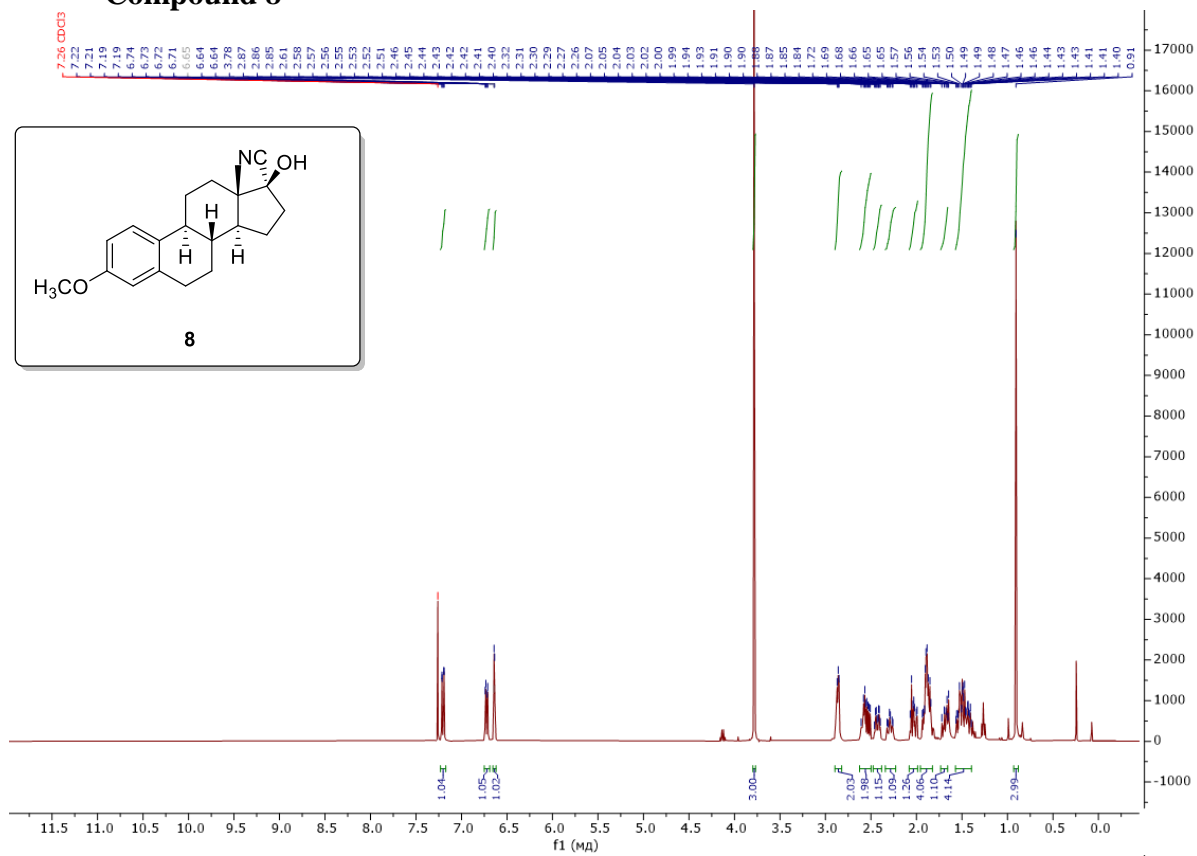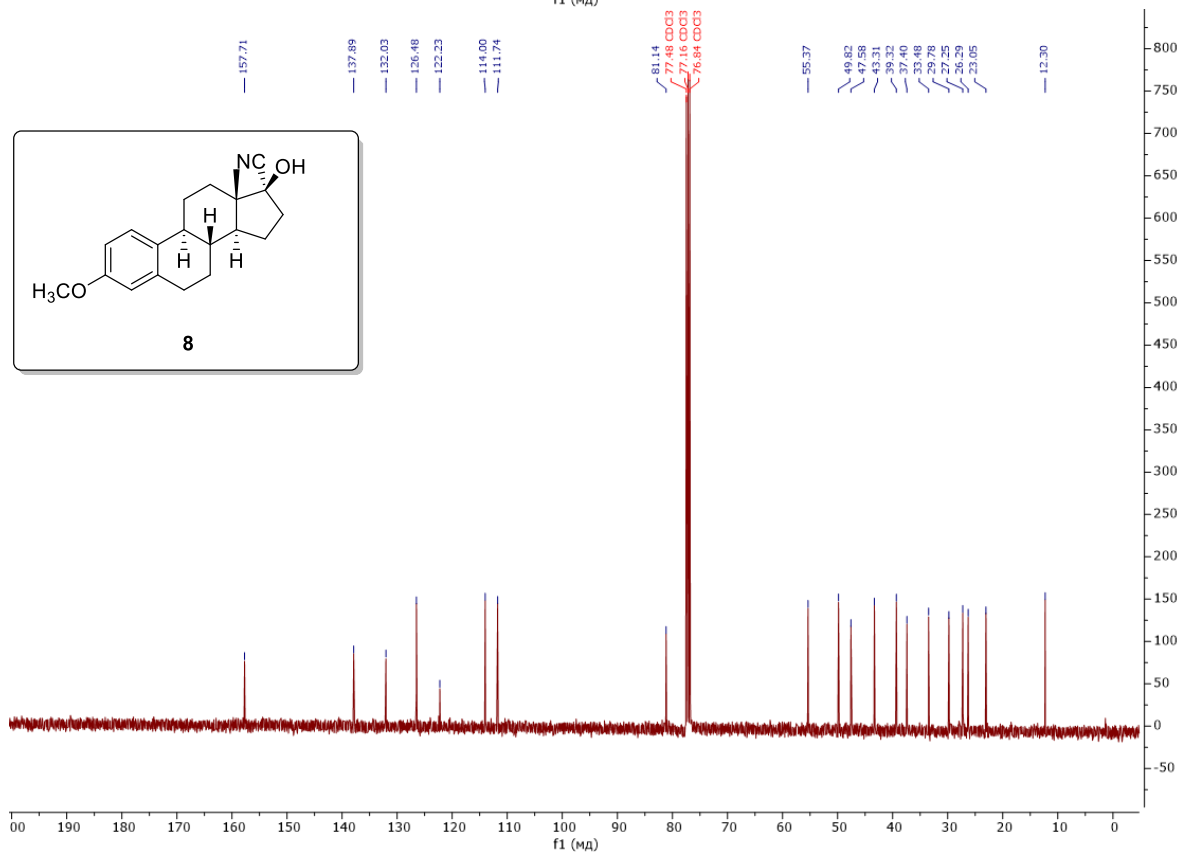

# Compound 9

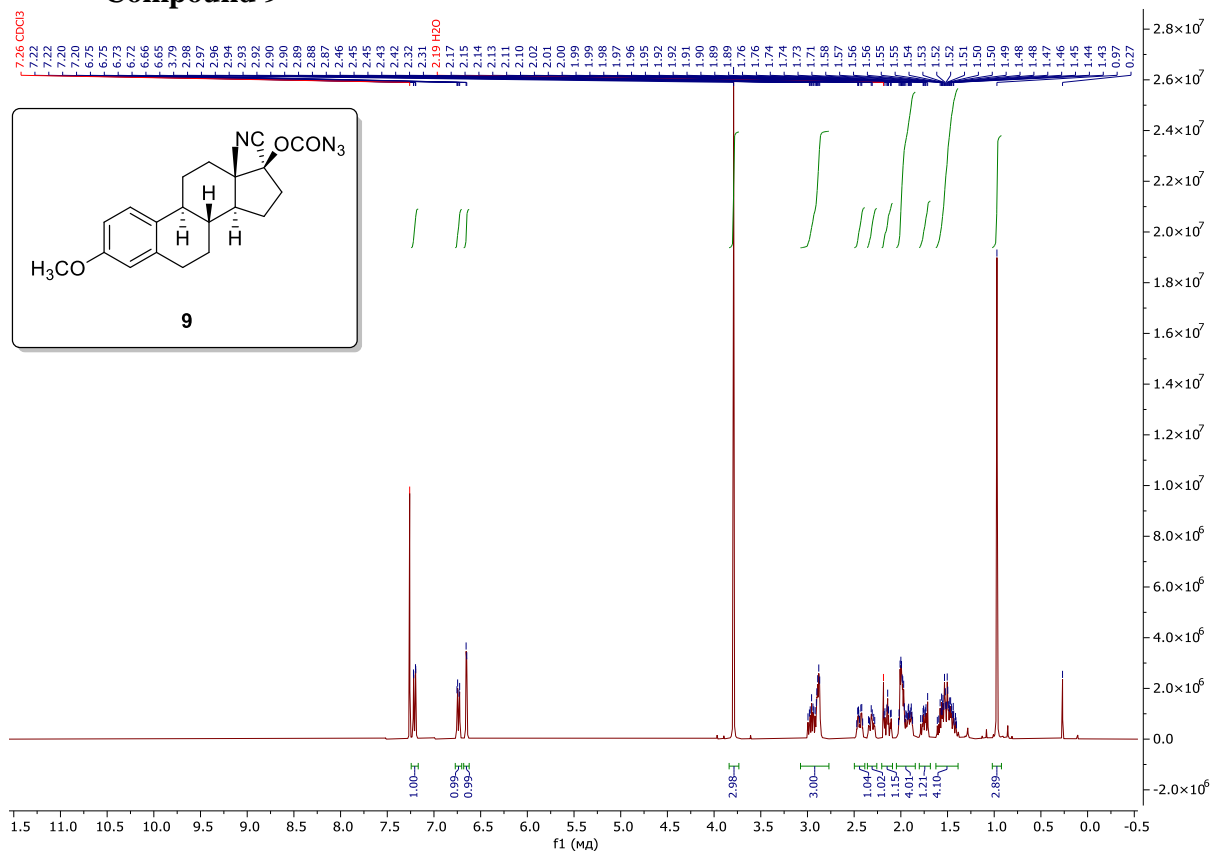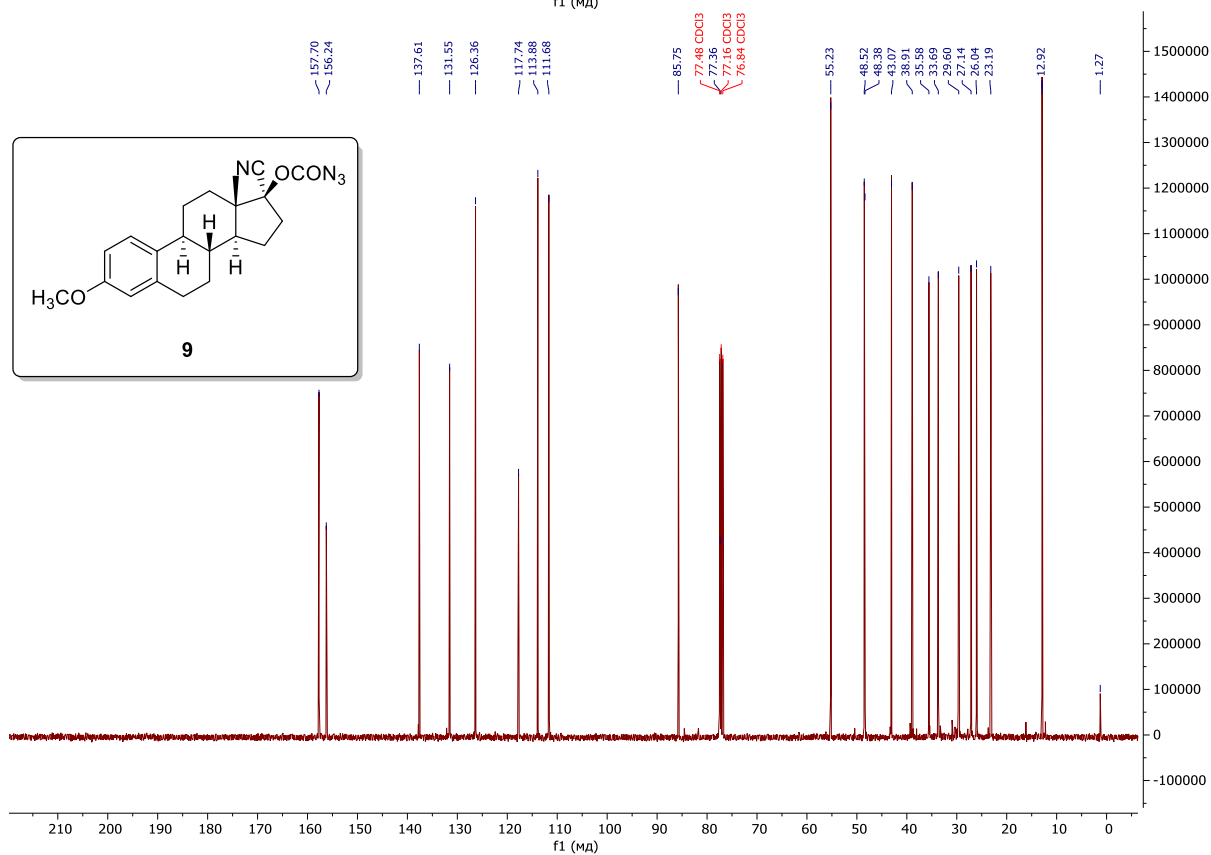

## Compound 10

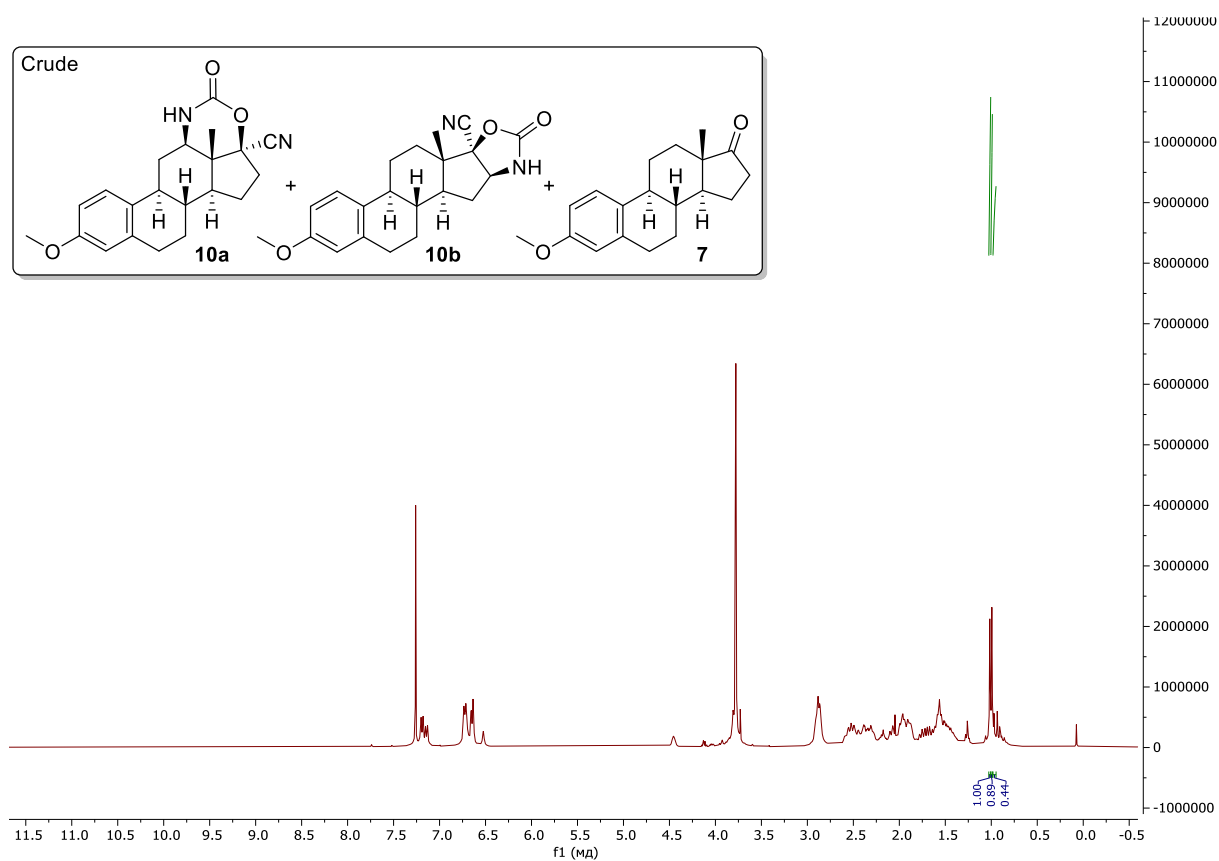

## Compound 11

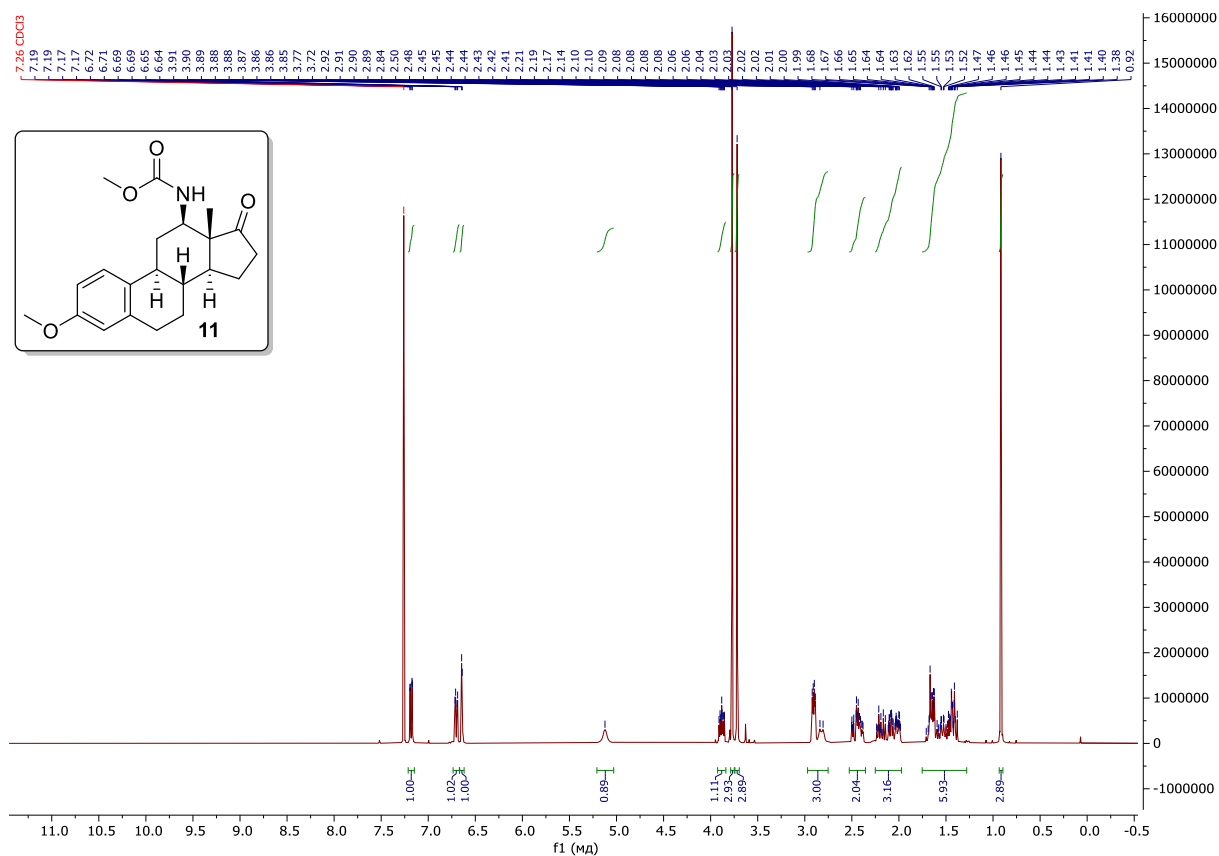

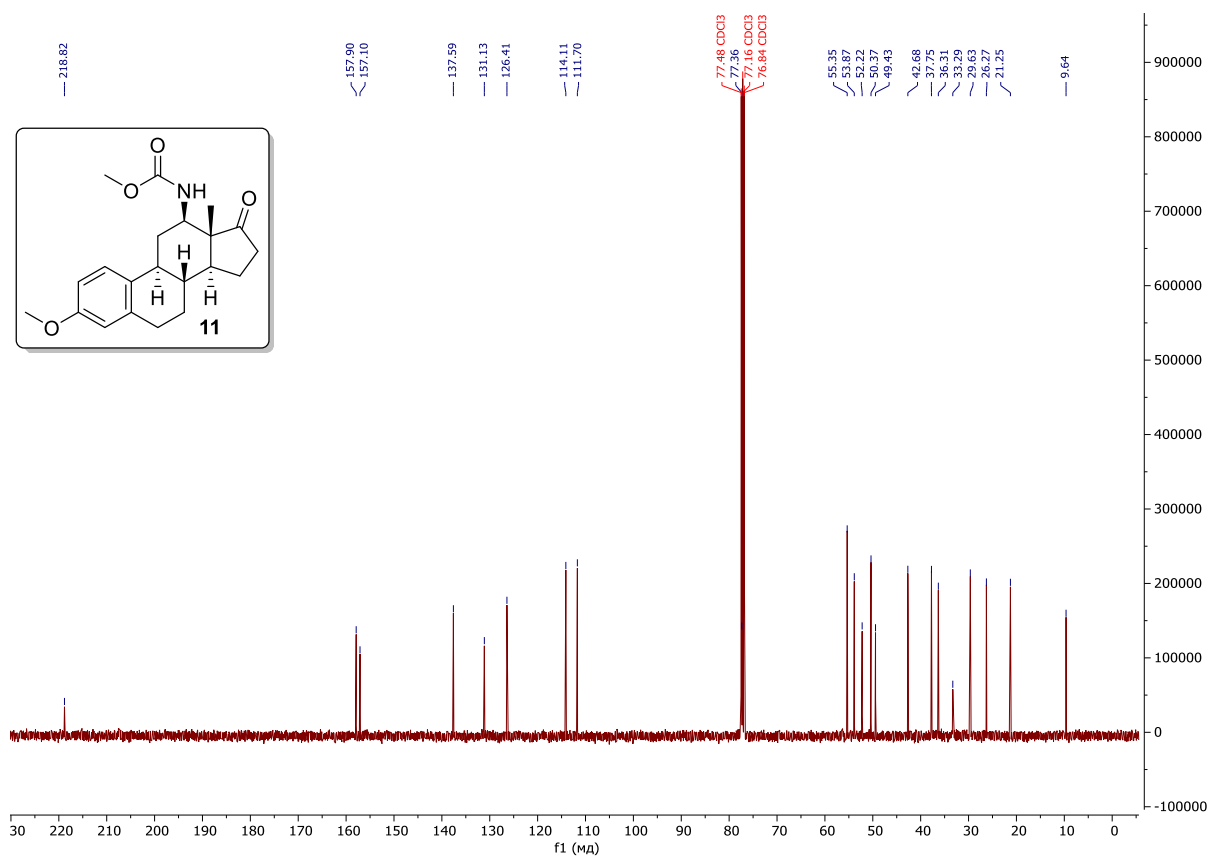

### Compound 11 COSY

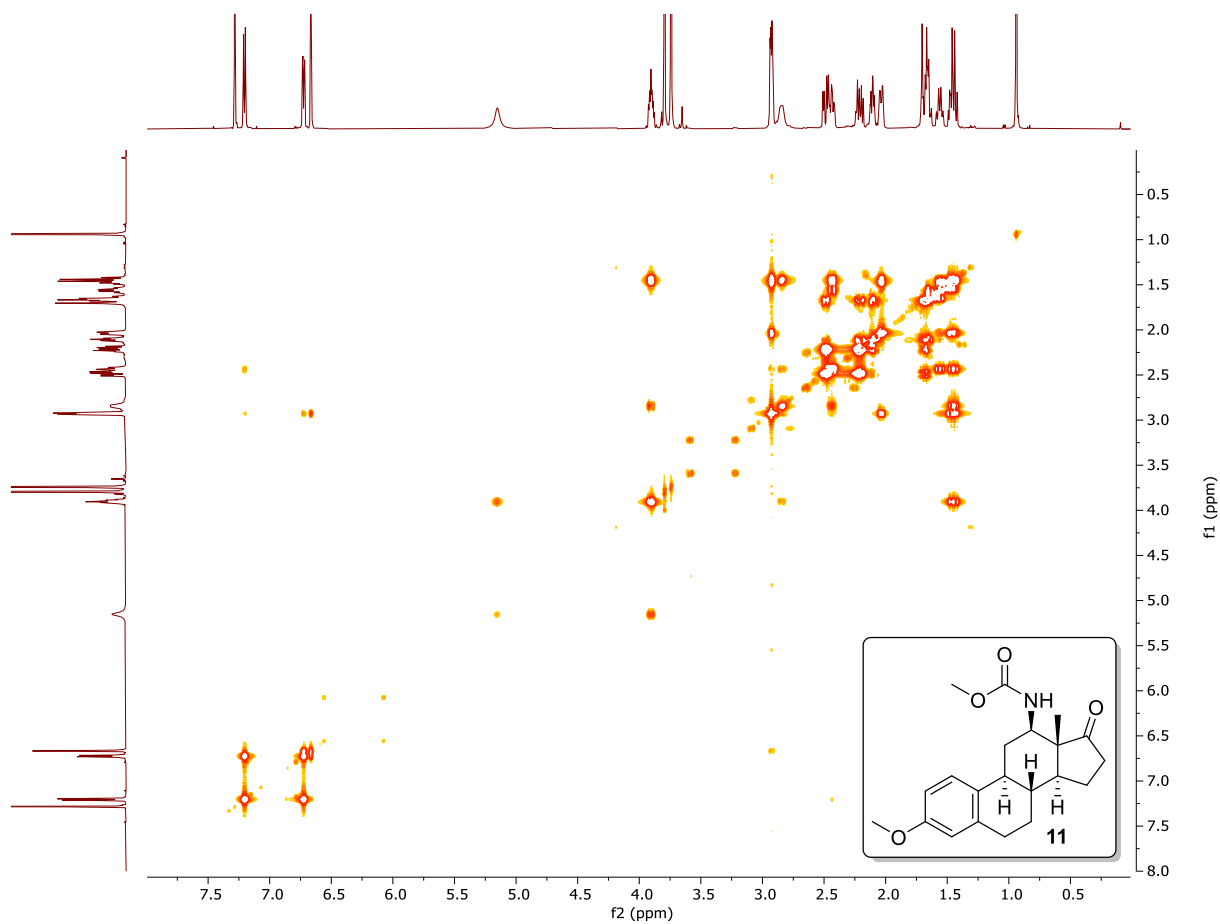

## Compound 11 HSQC

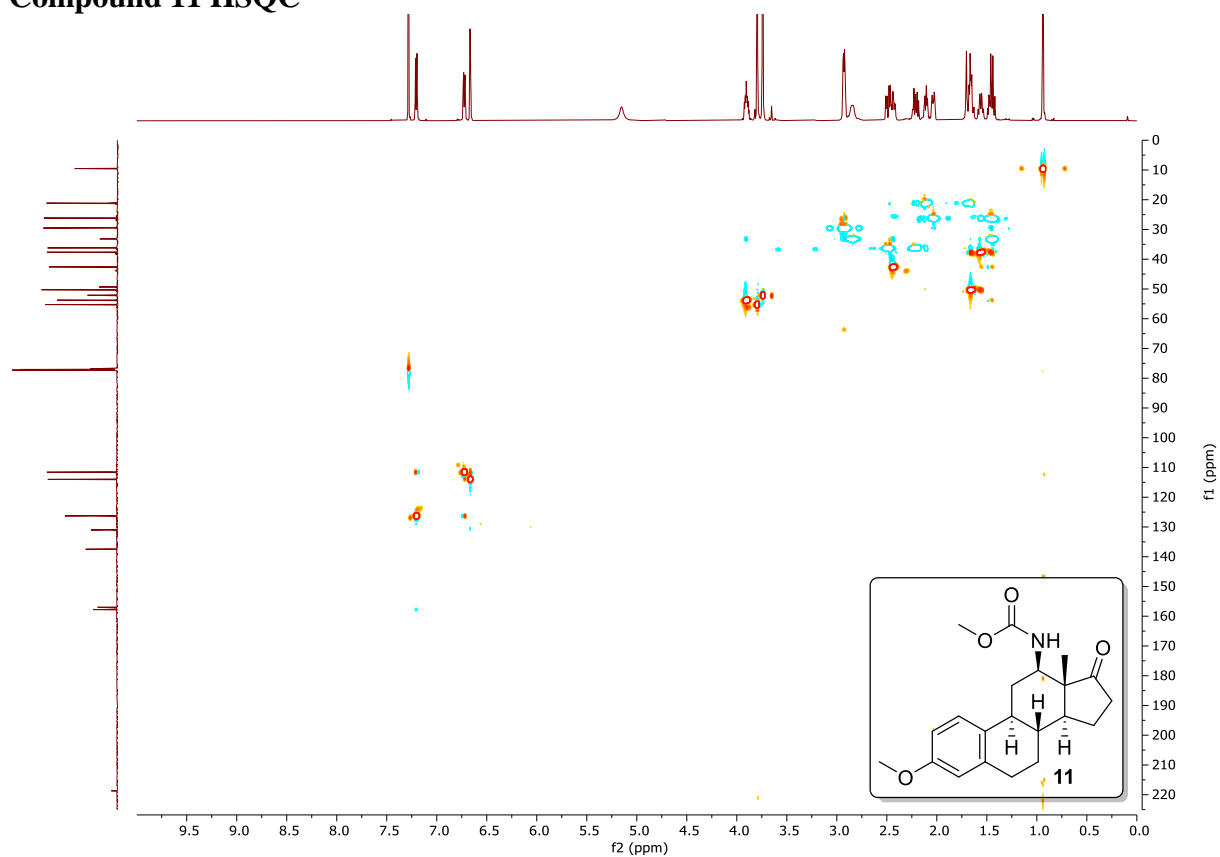

## Compound 11 HMBC

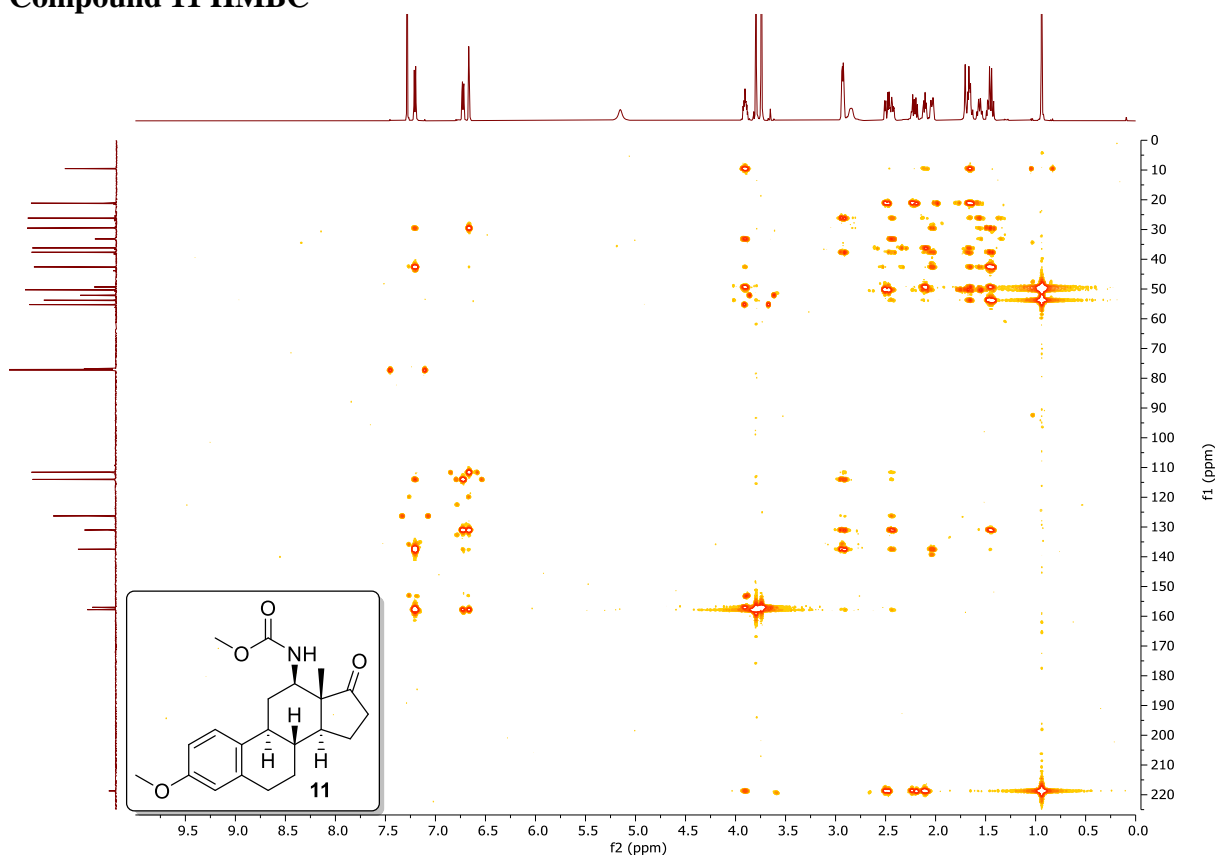

## Compound 11 Crosspeak Analysis

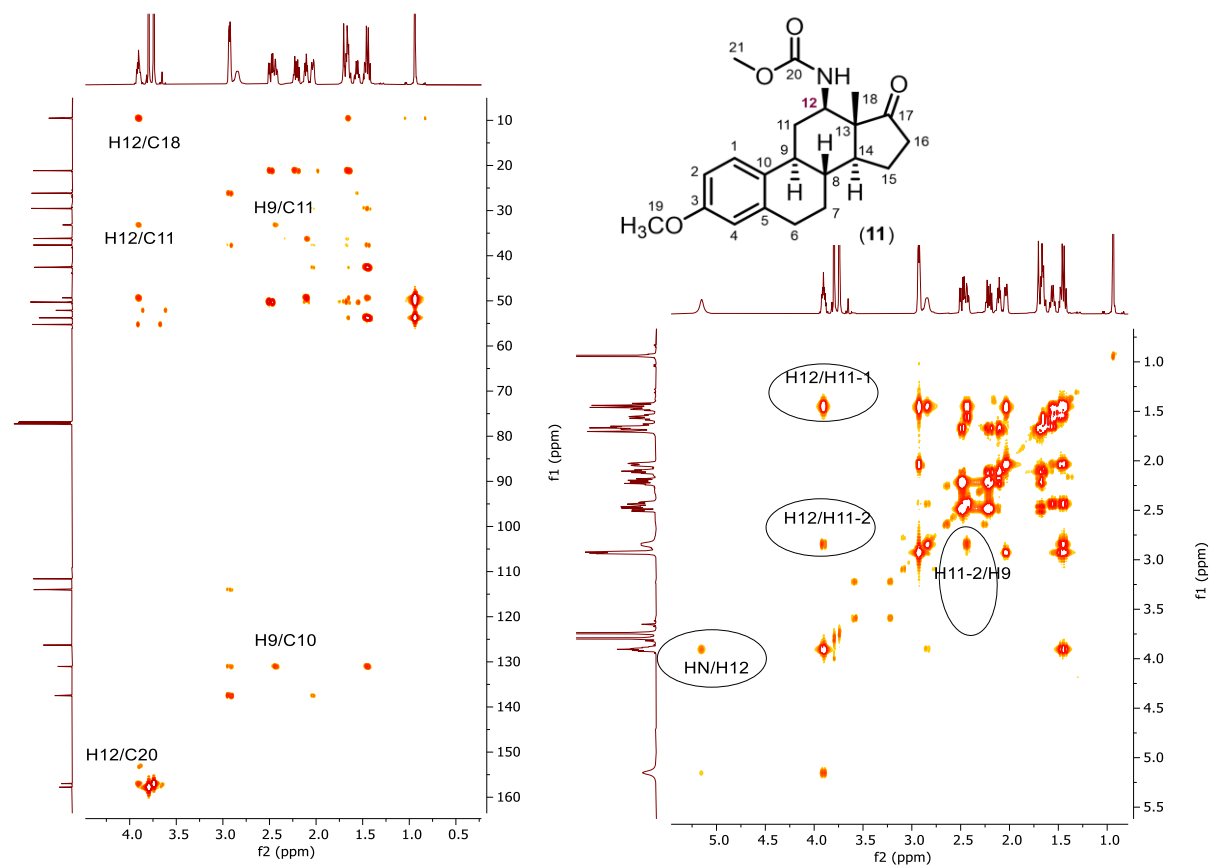

## Compound 12

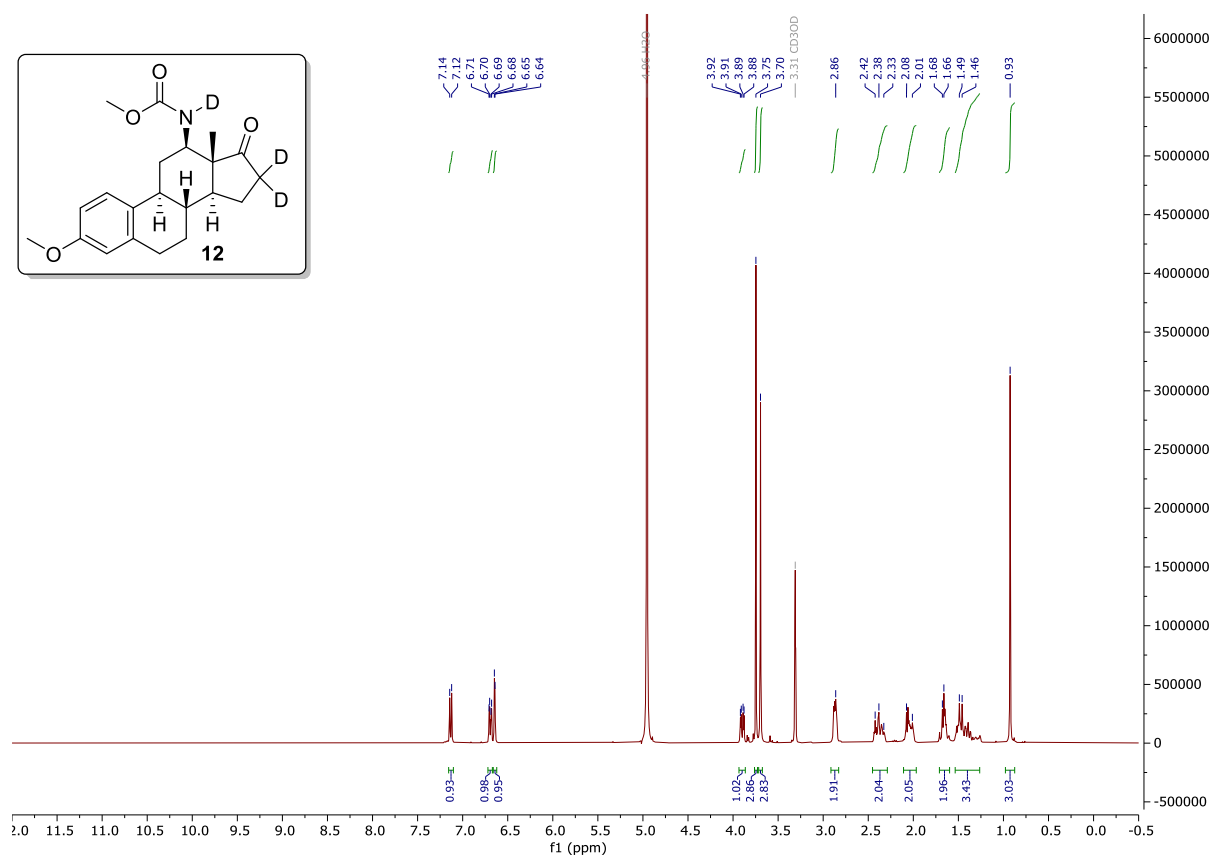

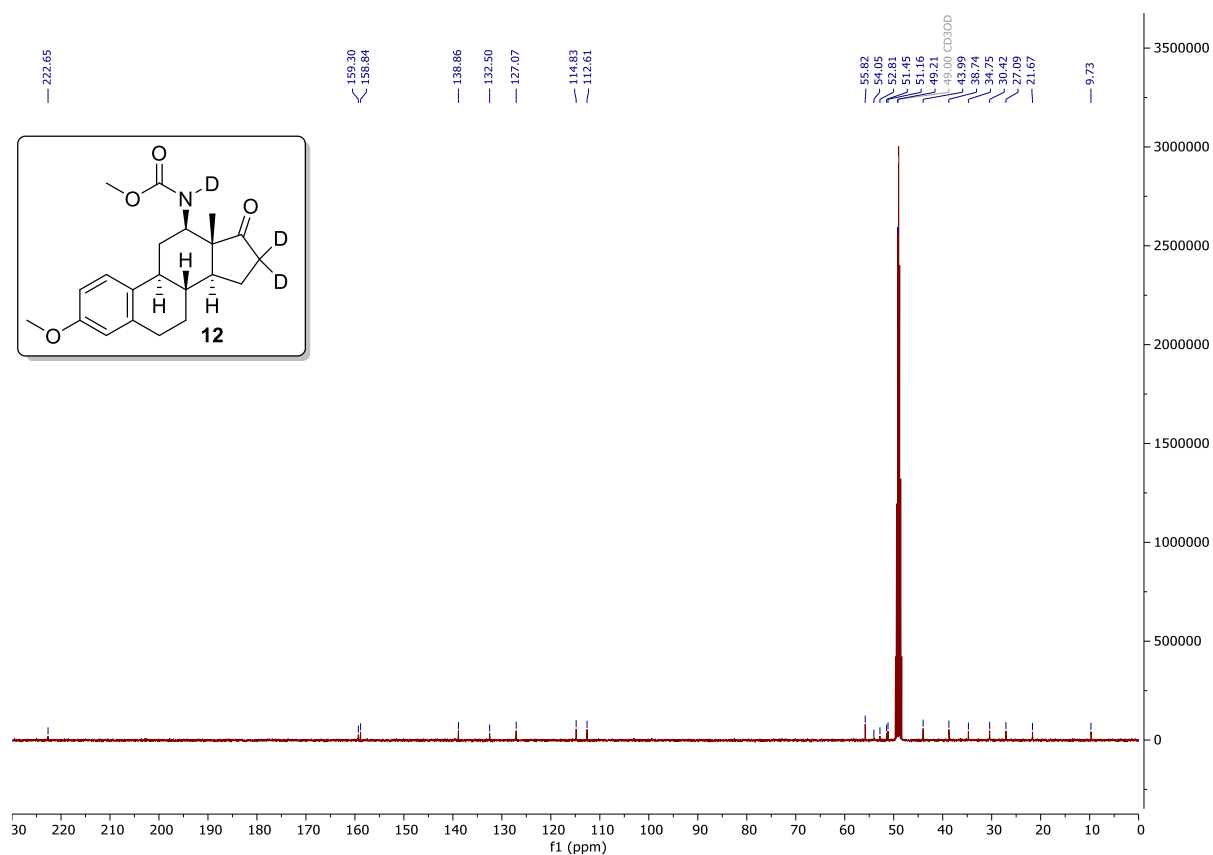

## Compound 12 COSY

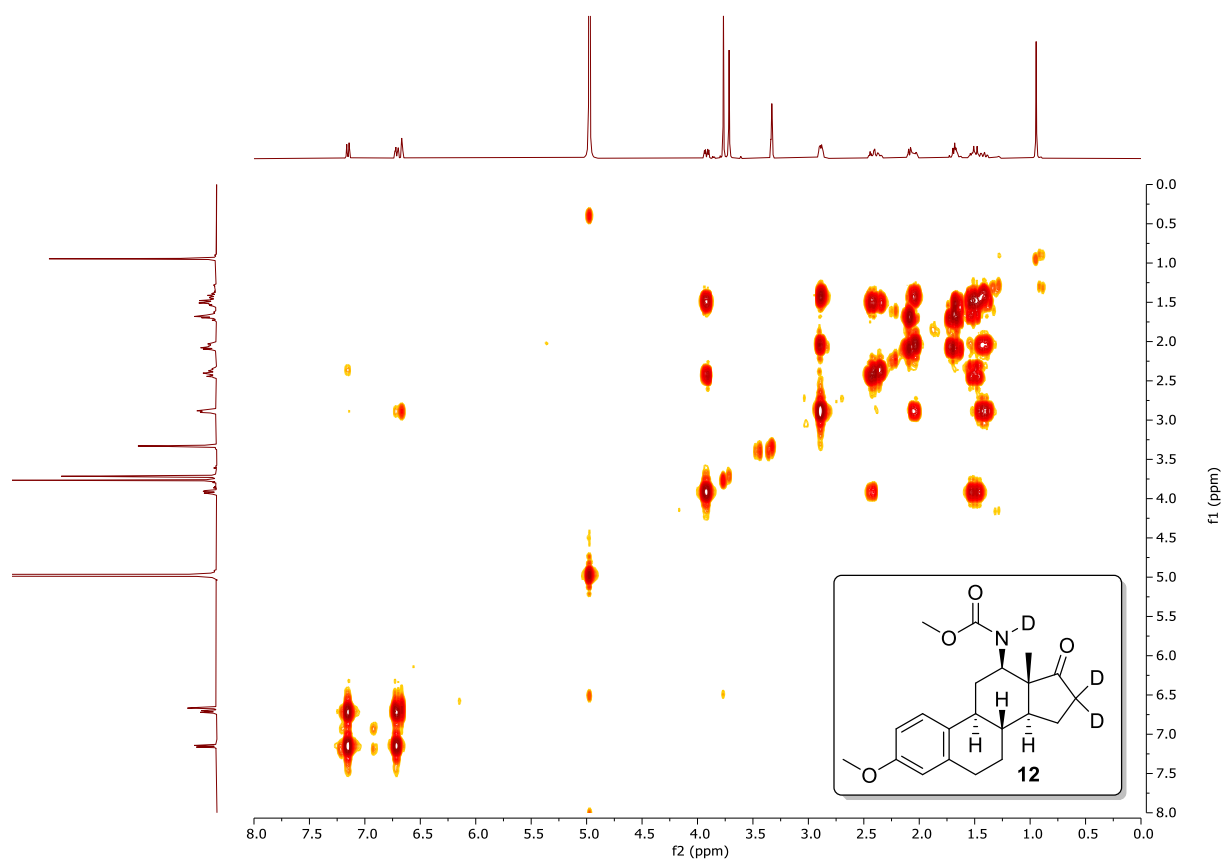

## Compound 12 HSQC

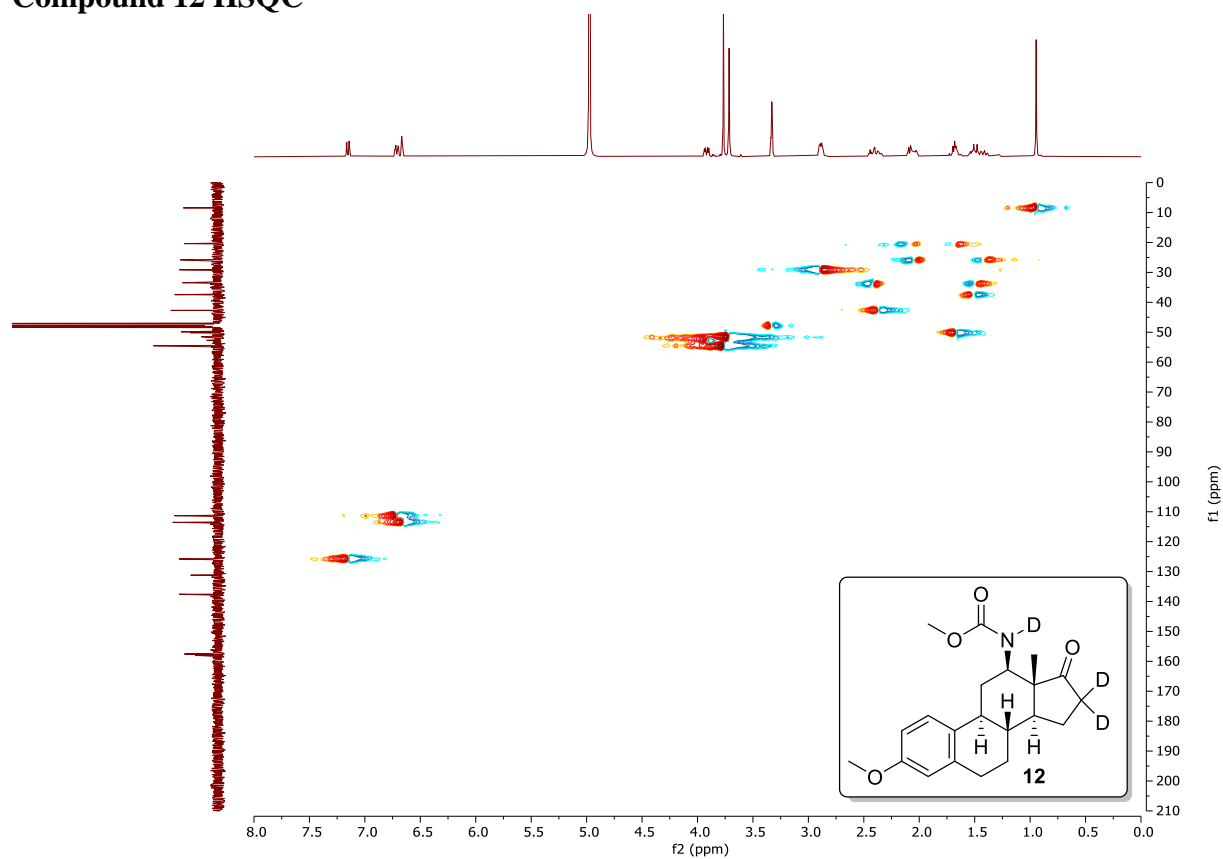

## Compound 12 HMBC

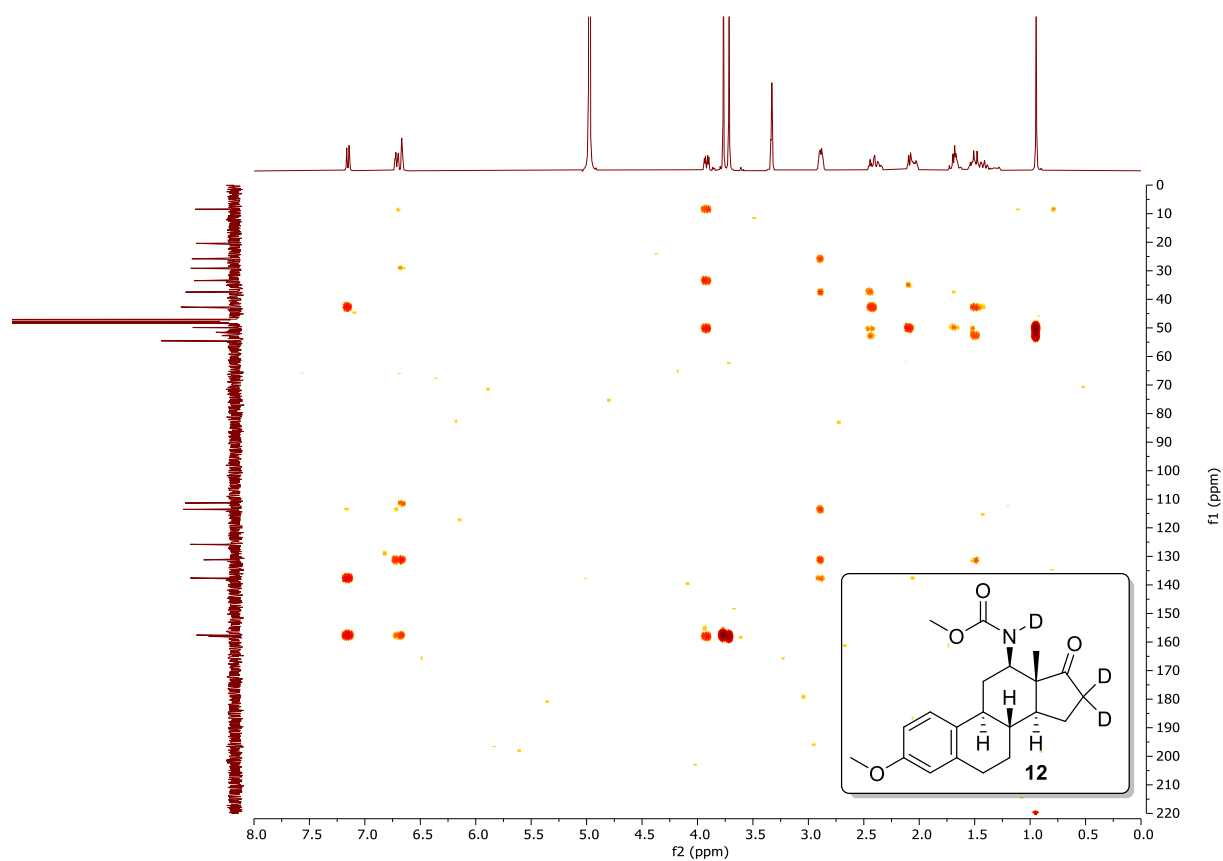

# Compound 13

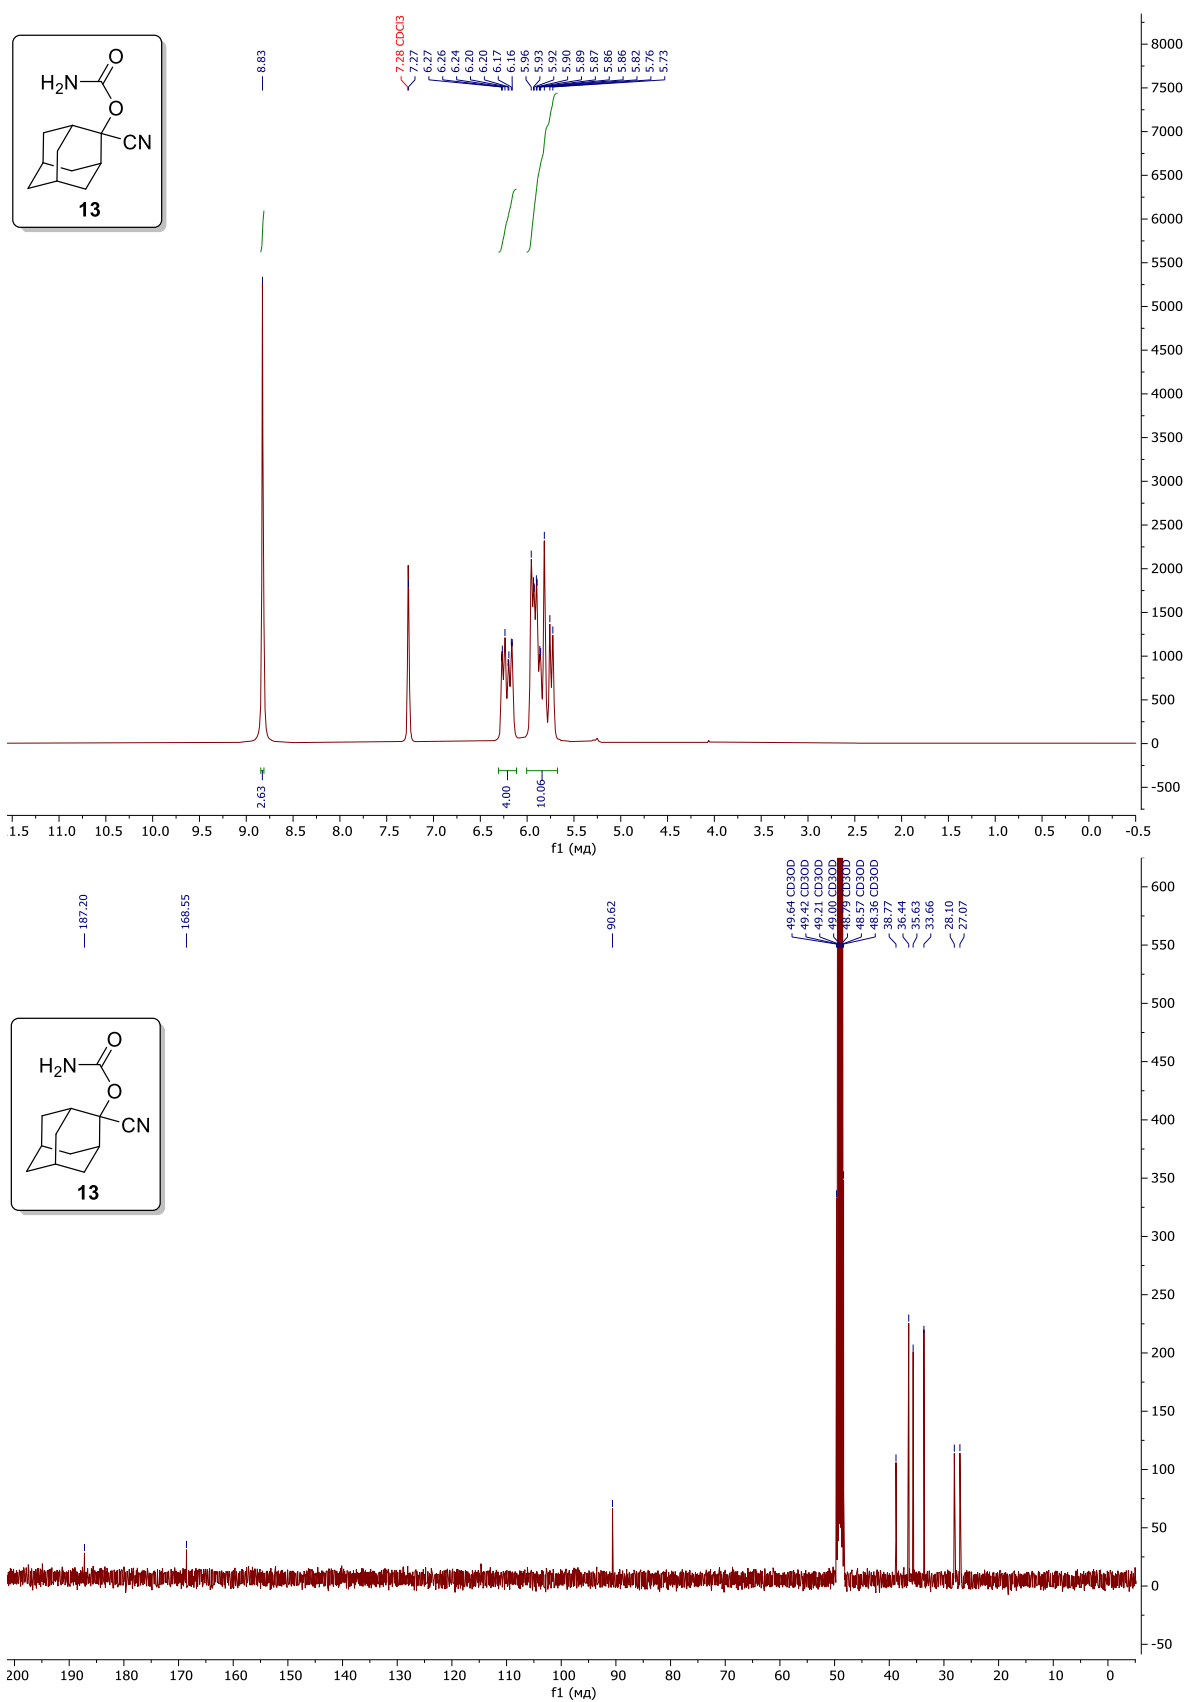

## 5. Crystallographic data collection and refinement details

The diffraction pattern for crystal structure determination of **4a1**, **4d2a** and **4h2** were measured on Bruker D8 VENTURE Kappa Duo PHOTONIII using I $\mu$ S micro-focus sealed tube at low temperature preserved by Cryostream Cooler. The structures were solved by direct methods (XT<sup>39a</sup>) and refined by full matrix least squares based on  $F^2$  (SHELXL2019<sup>39b</sup>). The hydrogen atoms on carbon were fixed into idealized positions (riding model) and assigned temperature factors either  $H_{iso}(H) = 1.2 U_{eq}(\text{pivot atom})$  or  $H_{iso}(H) = 1.5 U_{eq}(\text{pivot atom})$  for methyl moiety. The hydrogen atoms in -N-H moiety was found on difference Fourier map and refined under rigid-body approximation. Basic crystallographic data are given in Table 1.

**Table 1** Crystal data, data collection, and refinement parameters for **4a1**, **4d2a** and **4h2**

| Compound                                 | 4a1                                                          | 4d2a                                                          | 4h2                                                           |
|------------------------------------------|--------------------------------------------------------------|---------------------------------------------------------------|---------------------------------------------------------------|
| CCDC                                     | 2388740                                                      | 2388741                                                       | 2388739                                                       |
| Formula                                  | C <sub>8</sub> H <sub>10</sub> N <sub>2</sub> O <sub>2</sub> | C <sub>11</sub> H <sub>18</sub> N <sub>2</sub> O <sub>2</sub> | C <sub>16</sub> H <sub>18</sub> N <sub>2</sub> O <sub>2</sub> |
| M.w.                                     | 166.18                                                       | 210.27                                                        | 270.32                                                        |
| Crystal system                           | Monoclinic                                                   | Monoclinic                                                    | Triclinic                                                     |
| Space group                              | $P 2_1/c$ (No. 14)                                           | $P 2_1/c$ (No. 14)                                            | $P -1$ (No. 2)                                                |
| $a$ [Å]                                  | 11.5155 (8)                                                  | 8.9496 (3)                                                    | 8.2209 (3)                                                    |
| $b$ [Å]                                  | 5.6145 (3)                                                   | 6.5680 (2)                                                    | 11.6407 (4)                                                   |
| $c$ [Å]                                  | 12.6912 (9)                                                  | 20.8721 (7)                                                   | 13.6236 (5)                                                   |
| $\alpha$ [°]                             | 90                                                           | 90                                                            | 83.587 (1)                                                    |
| $\beta$ [°]                              | 100.496 (2)                                                  | 96.166 (1)                                                    | 81.241 (1)                                                    |
| $\gamma$ [°]                             | 90                                                           | 90                                                            | 73.437 (1)                                                    |
| $Z$                                      | 4                                                            | 4                                                             | 4                                                             |
| $V$ [Å <sup>3</sup> ]                    | 806.80 (9)                                                   | 1219.78 (7)                                                   | 1231.86 (8)                                                   |
| Temperature                              | 120                                                          | 150                                                           | 120                                                           |
| $D_x$ [g cm <sup>-3</sup> ]              | 1.368                                                        | 1.145                                                         | 1.458                                                         |
| Wavelength, Å                            | 0.71073                                                      | 1.54178                                                       | 1.54178                                                       |
| Crystal size [mm]                        | 0.46 × 0.19 × 0.15                                           | 0.52 × 0.16 × 0.16                                            | 0.42 × 0.21 × 0.10                                            |
| Crystal color, shape                     | prism, colourless                                            | Bar, colourless                                               | Plate, colourless                                             |
| $\mu$ [mm <sup>-1</sup> ]                | 0.10                                                         | 0.64                                                          | 0.78                                                          |
| $T_{min}, T_{max}$                       | 0.85, 0.98                                                   | 0.77, 0.90                                                    | 0.78, 0.93                                                    |
| Measured reflections                     | 26237                                                        | 33316                                                         | 15385                                                         |
| Independent diffractions ( $R_{int}^a$ ) | 1859, (0.040)                                                | 2634, (0.029)                                                 | 4444 (0.027)                                                  |
| Observed diffract. [ $I > 2\sigma(I)$ ]  | 1600                                                         | 2477                                                          | 4176                                                          |
| No. of parameters                        | 109                                                          | 158                                                           | 361                                                           |

|                                                  |             |             |             |
|--------------------------------------------------|-------------|-------------|-------------|
| $R^b$                                            | 0.035       | 0.038       | 0.035       |
| $wR(F^2)$ for all data                           | 0.094       | 0.110       | 0.099       |
| GOF <sup>c</sup>                                 | 1.06        | 1.06        | 1.03        |
| Residual electron density<br>[e/Å <sup>3</sup> ] | 0.35, -0.26 | 0.25, -0.17 | 0.31, -0.20 |

X-ray crystallographic data have been deposited with the Cambridge Crystallographic Data Centre (CCDC), the deposition numbers are in Table 1 and can be obtained free of charge from the Centre via its website ([www.ccdc.cam.ac.uk/structures/](http://www.ccdc.cam.ac.uk/structures/)).

#### References:

39a. SHELXT: Sheldrick, G.M. (2015). *Acta Cryst.* **A71**, 3-8.

39b. SHELXL: Sheldrick, G.M. (2015). *Acta Cryst.* **C71**, 3-8.

40. Parsons, S., Flack, H.D. and Wagner, T. (2013) *Acta Cryst.* **B69**, 249-259.

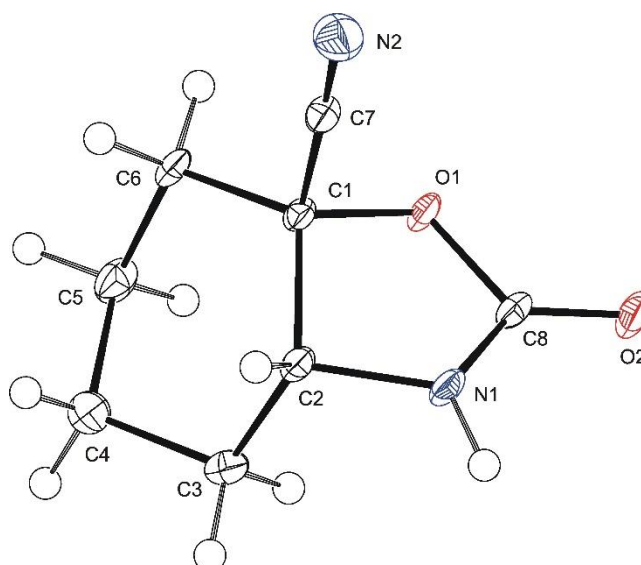

Fig. 1 View on the molecule of **4a1** with atom numbering schema. The displacement ellipsoids are drawn on 50% probability level.

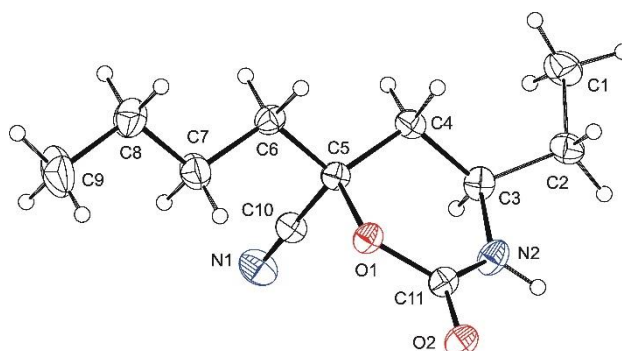

Fig. 2 View on the molecule of **4d2a** with atom numbering schema. The displacement ellipsoids are drawn on 30% probability level.

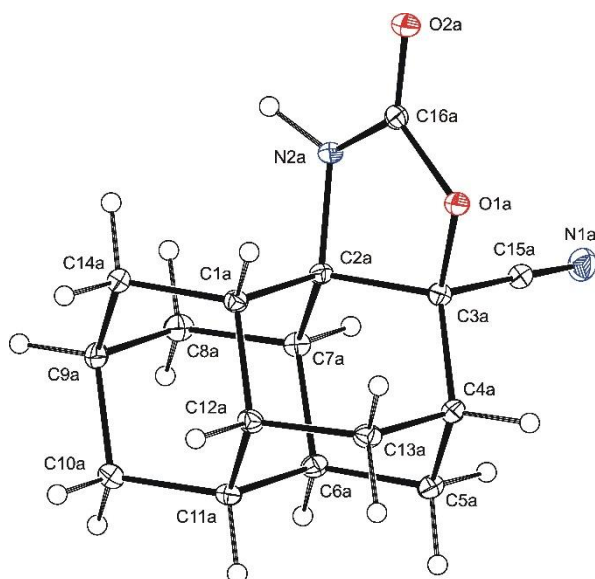

Fig. 3 View on the molecule of **4h2** with atom numbering schema. The displacement ellipsoids are drawn on 30% probability level.

## Computing details

Data collection: Bruker Instrument Service v2021.1.0.5; cell refinement: *SAINT* V8.40B (Bruker AXS LLC, 2019); data reduction: *SAINT* V8.40B (Bruker AXS LLC, 2019); program(s) used to solve structure: *SHELXT* 2018/2 (Sheldrick, 2018); program(s) used to refine structure: *SHELXL2019/2* (Sheldrick, 2019).

## Compound 4a1

### Crystal data

|                                |                                                         |
|--------------------------------|---------------------------------------------------------|
| $C_8H_{10}N_2O_2$              | $F(000) = 352$                                          |
| $M_r = 166.18$                 | $D_x = 1.368 \text{ Mg m}^{-3}$                         |
| Monoclinic, $P2_1/c$           | Mo $K\alpha$ radiation, $\lambda = 0.71073 \text{ \AA}$ |
| $a = 11.5155 (8) \text{ \AA}$  | Cell parameters from 8634 reflections                   |
| $b = 5.6145 (3) \text{ \AA}$   | $\theta = 3.3\text{--}27.5^\circ$                       |
| $c = 12.6912 (9) \text{ \AA}$  | $\mu = 0.10 \text{ mm}^{-1}$                            |
| $\beta = 100.496 (2)^\circ$    | $T = 120 \text{ K}$                                     |
| $V = 806.80 (9) \text{ \AA}^3$ | Prism, colourless                                       |
| $Z = 4$                        | $0.46 \times 0.19 \times 0.15 \text{ mm}$               |

### Data collection

|                                          |         |     |                                        |
|------------------------------------------|---------|-----|----------------------------------------|
| NoniusKappa+Bruker diffractometer        | APEX-II | CCD | 1859 independent reflections           |
| Radiation source: fine-focus sealed tube |         |     | 1600 reflections with $I > 2\sigma(I)$ |
| Graphite monochromator                   |         |     | $R_{\text{int}} = 0.040$               |

|                                                                                                                                                                                                                                                                                          |                                                            |
|------------------------------------------------------------------------------------------------------------------------------------------------------------------------------------------------------------------------------------------------------------------------------------------|------------------------------------------------------------|
| $\phi$ and $\omega$ scans                                                                                                                                                                                                                                                                | $\theta_{\max} = 27.5^\circ$ , $\theta_{\min} = 3.3^\circ$ |
| Absorption correction: multi-scan<br>Krause, L., Herbst-Irmer, R., Sheldrick, G. M.,<br>Stalke, D. (2015). "Comparison of silver and<br>molybdenum microfocus X-ray sources for<br>single-crystal structure determination" J. Appl.<br>Cryst. 48, 3-10.<br>doi:10.1107/S1600576714022985 | $h = -14 \rightarrow 14$                                   |
| $T_{\min} = 0.85$ , $T_{\max} = 0.98$                                                                                                                                                                                                                                                    | $k = -7 \rightarrow 7$                                     |
| 26237 measured reflections                                                                                                                                                                                                                                                               | $l = -16 \rightarrow 16$                                   |

## Refinement

|                                 |                                                                                     |
|---------------------------------|-------------------------------------------------------------------------------------|
| Refinement on $F^2$             | Primary atom site location: structure-invariant<br>direct methods                   |
| Least-squares matrix: full      | Secondary atom site location: difference Fourier<br>map                             |
| $R[F^2 > 2\sigma(F^2)] = 0.035$ | Hydrogen site location: mixed                                                       |
| $wR(F^2) = 0.094$               | H-atom parameters constrained                                                       |
| $S = 1.06$                      | $w = 1/[\sigma^2(F_o^2) + (0.0516P)^2 + 0.2426P]$<br>where $P = (F_o^2 + 2F_c^2)/3$ |
| 1859 reflections                | $(\Delta/\sigma)_{\max} < 0.001$                                                    |
| 109 parameters                  | $\Delta_{\max} = 0.35 \text{ e } \text{\AA}^{-3}$                                   |
| 0 restraints                    | $\Delta_{\min} = -0.26 \text{ e } \text{\AA}^{-3}$                                  |

## Special details

*Geometry.* All esds (except the esd in the dihedral angle between two l.s. planes) are estimated using the full covariance matrix. The cell esds are taken into account individually in the estimation of esds in distances, angles and torsion angles; correlations between esds in cell parameters are only used when they are defined by crystal symmetry. An approximate (isotropic) treatment of cell esds is used for estimating esds involving l.s. planes.

*Fractional atomic coordinates and isotropic or equivalent isotropic displacement parameters ( $\text{\AA}^2$ ) for 4a1.*

|    | $x$         | $y$          | $z$         | $U_{\text{iso}}^*/U_{\text{eq}}$ |
|----|-------------|--------------|-------------|----------------------------------|
| O1 | 0.23541 (6) | 0.20858 (13) | 0.64259 (6) | 0.01394 (19)                     |
| O2 | 0.07667 (7) | 0.09720 (14) | 0.71135 (6) | 0.0192 (2)                       |
| N1 | 0.12970 (8) | 0.49357 (16) | 0.70130 (7) | 0.0147 (2)                       |
| H1 | 0.065400    | 0.560668     | 0.719321    | 0.018*                           |
| N2 | 0.45305 (9) | 0.4397 (2)   | 0.82730 (8) | 0.0242 (2)                       |
| C1 | 0.30288 (9) | 0.42747 (19) | 0.64360 (8) | 0.0119 (2)                       |
| C2 | 0.20814 (9) | 0.62253 (19) | 0.64263 (8) | 0.0128 (2)                       |
| H2 | 0.242273    | 0.766459     | 0.683302    | 0.015*                           |
| C3 | 0.14546 (9) | 0.6897 (2)   | 0.52988 (9) | 0.0172 (2)                       |

|     |              |              |             |            |
|-----|--------------|--------------|-------------|------------|
| H3A | 0.089003     | 0.562012     | 0.501617    | 0.021*     |
| H3B | 0.099835     | 0.837946     | 0.533542    | 0.021*     |
| C4  | 0.23161 (10) | 0.7267 (2)   | 0.45315 (9) | 0.0209 (3) |
| H4A | 0.187930     | 0.773695     | 0.381641    | 0.025*     |
| H4B | 0.288011     | 0.855376     | 0.480132    | 0.025*     |
| C5  | 0.29803 (10) | 0.4958 (2)   | 0.44462 (9) | 0.0192 (3) |
| H5A | 0.349366     | 0.513543     | 0.390453    | 0.023*     |
| H5B | 0.241047     | 0.365900     | 0.421048    | 0.023*     |
| C6  | 0.37306 (9)  | 0.4323 (2)   | 0.55257 (9) | 0.0148 (2) |
| H6A | 0.437800     | 0.549809     | 0.569908    | 0.018*     |
| H6B | 0.409250     | 0.273825     | 0.547131    | 0.018*     |
| C7  | 0.38706 (9)  | 0.43270 (19) | 0.74797 (9) | 0.0154 (2) |
| C8  | 0.13798 (9)  | 0.2577 (2)   | 0.68853 (8) | 0.0137 (2) |

*Atomic displacement parameters ( $\text{\AA}^2$ ) for 4a1.*

|    | $U^{11}$   | $U^{22}$   | $U^{33}$   | $U^{12}$    | $U^{13}$    | $U^{23}$    |
|----|------------|------------|------------|-------------|-------------|-------------|
| O1 | 0.0092 (4) | 0.0124 (4) | 0.0223 (4) | -0.0020 (3) | 0.0082 (3)  | -0.0021 (3) |
| O2 | 0.0139 (4) | 0.0186 (4) | 0.0277 (5) | -0.0043 (3) | 0.0107 (3)  | -0.0002 (3) |
| N1 | 0.0100 (4) | 0.0157 (5) | 0.0205 (5) | 0.0006 (3)  | 0.0086 (4)  | -0.0012 (4) |
| N2 | 0.0215 (5) | 0.0253 (5) | 0.0240 (5) | -0.0015 (4) | -0.0010 (4) | 0.0025 (4)  |
| C1 | 0.0080 (5) | 0.0119 (5) | 0.0162 (5) | -0.0015 (4) | 0.0031 (4)  | -0.0001 (4) |
| C2 | 0.0096 (5) | 0.0130 (5) | 0.0168 (5) | -0.0005 (4) | 0.0049 (4)  | -0.0009 (4) |
| C3 | 0.0117 (5) | 0.0200 (5) | 0.0196 (5) | 0.0027 (4)  | 0.0017 (4)  | 0.0013 (4)  |
| C4 | 0.0183 (6) | 0.0260 (6) | 0.0185 (6) | 0.0020 (5)  | 0.0037 (4)  | 0.0059 (5)  |
| C5 | 0.0154 (5) | 0.0276 (6) | 0.0157 (5) | -0.0003 (5) | 0.0061 (4)  | -0.0009 (5) |
| C6 | 0.0088 (5) | 0.0183 (5) | 0.0187 (5) | -0.0011 (4) | 0.0066 (4)  | -0.0010 (4) |
| C7 | 0.0119 (5) | 0.0147 (5) | 0.0204 (5) | -0.0006 (4) | 0.0054 (4)  | 0.0018 (4)  |
| C8 | 0.0090 (5) | 0.0179 (5) | 0.0152 (5) | 0.0000 (4)  | 0.0050 (4)  | -0.0008 (4) |

*Geometric parameters ( $\text{\AA}$ ,  $^\circ$ ) for 4a1.*

|       |             |        |             |
|-------|-------------|--------|-------------|
| O1—C8 | 1.3833 (12) | C3—C4  | 1.5257 (15) |
| O1—C1 | 1.4528 (12) | C3—H3A | 0.9900      |
| O2—C8 | 1.2120 (13) | C3—H3B | 0.9900      |
| N1—C8 | 1.3396 (14) | C4—C5  | 1.5191 (17) |
| N1—C2 | 1.4628 (13) | C4—H4A | 0.9900      |
| N1—H1 | 0.8968      | C4—H4B | 0.9900      |
| N2—C7 | 1.1462 (15) | C5—C6  | 1.5230 (15) |
| C1—C7 | 1.4925 (15) | C5—H5A | 0.9900      |
| C1—C6 | 1.5260 (14) | C5—H5B | 0.9900      |
| C1—C2 | 1.5443 (14) | C6—H6A | 0.9900      |

|            |             |            |             |
|------------|-------------|------------|-------------|
| C2—C3      | 1.5278 (15) | C6—H6B     | 0.9900      |
| C2—H2      | 1.0000      |            |             |
|            |             |            |             |
| C8—O1—C1   | 107.52 (8)  | C5—C4—C3   | 108.88 (9)  |
| C8—N1—C2   | 111.32 (8)  | C5—C4—H4A  | 109.9       |
| C8—N1—H1   | 121.8       | C3—C4—H4A  | 109.9       |
| C2—N1—H1   | 122.5       | C5—C4—H4B  | 109.9       |
| O1—C1—C7   | 106.52 (8)  | C3—C4—H4B  | 109.9       |
| O1—C1—C6   | 111.37 (8)  | H4A—C4—H4B | 108.3       |
| C7—C1—C6   | 108.88 (8)  | C4—C5—C6   | 110.25 (9)  |
| O1—C1—C2   | 102.95 (8)  | C4—C5—H5A  | 109.6       |
| C7—C1—C2   | 109.68 (9)  | C6—C5—H5A  | 109.6       |
| C6—C1—C2   | 116.89 (9)  | C4—C5—H5B  | 109.6       |
| N1—C2—C3   | 111.63 (9)  | C6—C5—H5B  | 109.6       |
| N1—C2—C1   | 98.38 (8)   | H5A—C5—H5B | 108.1       |
| C3—C2—C1   | 113.27 (9)  | C5—C6—C1   | 113.16 (9)  |
| N1—C2—H2   | 111.0       | C5—C6—H6A  | 108.9       |
| C3—C2—H2   | 111.0       | C1—C6—H6A  | 108.9       |
| C1—C2—H2   | 111.0       | C5—C6—H6B  | 108.9       |
| C4—C3—C2   | 112.34 (9)  | C1—C6—H6B  | 108.9       |
| C4—C3—H3A  | 109.1       | H6A—C6—H6B | 107.8       |
| C2—C3—H3A  | 109.1       | N2—C7—C1   | 178.69 (12) |
| C4—C3—H3B  | 109.1       | O2—C8—N1   | 130.45 (10) |
| C2—C3—H3B  | 109.1       | O2—C8—O1   | 120.33 (10) |
| H3A—C3—H3B | 107.9       | N1—C8—O1   | 109.22 (9)  |

Document origin: *publCIF* [Westrip, S. P. (2010). *J. Apply. Cryst.*, **43**, 920-925].

## Computing details

Data collection: Bruker Instrument Service v8.5.1.2 Release; cell refinement: *SAINT* V8.40B (Bruker AXS LLC, 2019); data reduction: *SAINT* V8.40B (Bruker AXS LLC, 2019); program(s) used to solve structure: *SHELXT* 2018/2 (Sheldrick, 2018); program(s) used to refine structure: *SHELXL* 2019/2 (Sheldrick, 2019).

## Compound 4d2a

### Crystal data

|                              |                                                         |
|------------------------------|---------------------------------------------------------|
| $C_{11}H_{18}N_2O_2$         | $F(000) = 456$                                          |
| $M_r = 210.27$               | $D_x = 1.145 \text{ Mg m}^{-3}$                         |
| Monoclinic, $P2_1/c$         | Cu $K\alpha$ radiation, $\lambda = 1.54178 \text{ \AA}$ |
| $a = 8.9496 (3) \text{ \AA}$ | Cell parameters from 9949 reflections                   |

|                                 |                                           |
|---------------------------------|-------------------------------------------|
| $b = 6.5680 (2) \text{ \AA}$    | $\theta = 5.6\text{--}79.2^\circ$         |
| $c = 20.8721 (7) \text{ \AA}$   | $\mu = 0.64 \text{ mm}^{-1}$              |
| $\beta = 96.166 (1)^\circ$      | $T = 150 \text{ K}$                       |
| $V = 1219.78 (7) \text{ \AA}^3$ | Bar, colourless                           |
| $Z = 4$                         | $0.52 \times 0.16 \times 0.16 \text{ mm}$ |

### Data collection

|                                                                                                                                                                                                                                                                              |                                                                        |
|------------------------------------------------------------------------------------------------------------------------------------------------------------------------------------------------------------------------------------------------------------------------------|------------------------------------------------------------------------|
| Bruker D8 VENTURE Kappa Duo PHOTONIII CMOS diffractometer                                                                                                                                                                                                                    | 2634 independent reflections                                           |
| Radiation source: I $\mu$ S micro-focus sealed tube                                                                                                                                                                                                                          | 2477 reflections with $I > 2\sigma(I)$                                 |
| Helios Cu multilayer optic monochromator                                                                                                                                                                                                                                     | $R_{\text{int}} = 0.029$                                               |
| $\phi$ and $\omega$ scans                                                                                                                                                                                                                                                    | $\theta_{\text{max}} = 79.4^\circ$ , $\theta_{\text{min}} = 5.0^\circ$ |
| Absorption correction: multi-scan<br>Krause, L., Herbst-Irmer, R., Sheldrick, G. M., Stalke, D. (2015). "Comparison of silver and molybdenum microfocus X-ray sources for single-crystal structure determination" J. Appl. Cryst. 48, 3-10.<br>doi:10.1107/S1600576714022985 | $h = -11 \rightarrow 11$                                               |
| $T_{\text{min}} = 0.77$ , $T_{\text{max}} = 0.90$                                                                                                                                                                                                                            | $k = -7 \rightarrow 8$                                                 |
| 33316 measured reflections                                                                                                                                                                                                                                                   | $l = -26 \rightarrow 26$                                               |

### Refinement

|                                 |                                                                                    |
|---------------------------------|------------------------------------------------------------------------------------|
| Refinement on $F^2$             | Primary atom site location: structure-invariant direct methods                     |
| Least-squares matrix: full      | Secondary atom site location: difference Fourier map                               |
| $R[F^2 > 2\sigma(F^2)] = 0.038$ | Hydrogen site location: mixed                                                      |
| $wR(F^2) = 0.110$               | H-atom parameters constrained                                                      |
| $S = 1.06$                      | $w = 1/[\sigma^2(F_o^2) + (0.0539P)^2 + 0.264P]$<br>where $P = (F_o^2 + 2F_c^2)/3$ |
| 2634 reflections                | $(\Delta/\sigma)_{\text{max}} < 0.001$                                             |
| 158 parameters                  | $\Delta_{\text{max}} = 0.25 \text{ e \AA}^{-3}$                                    |
| 0 restraints                    | $\Delta_{\text{min}} = -0.17 \text{ e \AA}^{-3}$                                   |

### Special details

*Geometry.* All esds (except the esd in the dihedral angle between two l.s. planes) are estimated using the full covariance matrix. The cell esds are taken into account individually in the estimation of esds in distances, angles and torsion angles; correlations between esds in cell parameters are only used when they are defined by crystal symmetry. An approximate (isotropic) treatment of cell esds is used for estimating esds involving l.s. planes.

*Fractional atomic coordinates and isotropic or equivalent isotropic displacement parameters ( $\text{\AA}^2$ ) for 4d2a.*

|      | $x$          | $Y$          | $z$          | $U_{\text{iso}}^*/U_{\text{eq}}$ | Occ. (<1) |
|------|--------------|--------------|--------------|----------------------------------|-----------|
| O1   | 0.36976 (8)  | 0.41541 (11) | 0.41711 (3)  | 0.03477 (19)                     |           |
| O2   | 0.34871 (8)  | 0.15675 (12) | 0.48210 (3)  | 0.0402 (2)                       |           |
| N1   | 0.39740 (12) | 0.30191 (17) | 0.26247 (5)  | 0.0508 (3)                       |           |
| N2   | 0.57067 (10) | 0.19747 (15) | 0.44110 (4)  | 0.0425 (2)                       |           |
| H2   | 0.600256     | 0.092927     | 0.461065     | 0.051*                           |           |
| C1   | 0.9471 (2)   | 0.3997 (4)   | 0.41483 (12) | 0.0545 (7)                       | 0.594 (4) |
| H1A  | 1.044805     | 0.366873     | 0.438410     | 0.082*                           | 0.594 (4) |
| H1B  | 0.929718     | 0.546740     | 0.416734     | 0.082*                           | 0.594 (4) |
| H1C  | 0.946416     | 0.357423     | 0.369764     | 0.082*                           | 0.594 (4) |
| C2   | 0.8225 (6)   | 0.2868 (7)   | 0.4455 (3)   | 0.0442 (9)                       | 0.594 (4) |
| H2A  | 0.848840     | 0.140792     | 0.450244     | 0.053*                           | 0.594 (4) |
| H2B  | 0.813831     | 0.343003     | 0.488937     | 0.053*                           | 0.594 (4) |
| C1B  | 0.9206 (3)   | 0.1546 (6)   | 0.46784 (17) | 0.0558 (10)                      | 0.406 (4) |
| H1BA | 1.023939     | 0.184164     | 0.485934     | 0.084*                           | 0.406 (4) |
| H1BB | 0.922050     | 0.060319     | 0.431508     | 0.084*                           | 0.406 (4) |
| H1BC | 0.865815     | 0.092423     | 0.501043     | 0.084*                           | 0.406 (4) |
| C2B  | 0.8444 (8)   | 0.3480 (10)  | 0.4450 (4)   | 0.0439 (13)                      | 0.406 (4) |
| H2BA | 0.908364     | 0.420691     | 0.416598     | 0.053*                           | 0.406 (4) |
| H2BB | 0.833143     | 0.436389     | 0.482604     | 0.053*                           | 0.406 (4) |
| C3   | 0.67815 (12) | 0.30798 (17) | 0.40553 (5)  | 0.0389 (2)                       |           |
| H3   | 0.682847     | 0.232926     | 0.364003     | 0.058*                           |           |
| C4   | 0.61722 (11) | 0.52024 (16) | 0.39059 (5)  | 0.0353 (2)                       |           |
| H4A  | 0.670586     | 0.581355     | 0.356138     | 0.042*                           |           |
| H4B  | 0.636390     | 0.606583     | 0.429480     | 0.042*                           |           |
| C5   | 0.44966 (11) | 0.51607 (15) | 0.36911 (4)  | 0.0316 (2)                       |           |
| C6   | 0.37949 (12) | 0.72728 (16) | 0.36103 (5)  | 0.0366 (2)                       |           |
| H6A  | 0.397964     | 0.801351     | 0.402429     | 0.044*                           |           |
| H6B  | 0.430039     | 0.803421     | 0.328551     | 0.044*                           |           |
| C7   | 0.21126 (15) | 0.7244 (2)   | 0.34026 (7)  | 0.0550 (3)                       |           |
| H7A  | 0.193335     | 0.651335     | 0.298648     | 0.066*                           |           |
| H7B  | 0.161324     | 0.646079     | 0.372450     | 0.066*                           |           |
| C8   | 0.13900 (15) | 0.9304 (2)   | 0.33277 (7)  | 0.0563 (3)                       |           |
| H8A  | 0.187621     | 1.008852     | 0.300214     | 0.068*                           |           |
| H8B  | 0.156568     | 1.004250     | 0.374243     | 0.068*                           |           |
| C9   | -0.0279 (2)  | 0.9208 (3)   | 0.31254 (10) | 0.0882 (6)                       |           |
| H9A  | -0.068600    | 1.059233     | 0.308255     | 0.132*                           |           |
| H9B  | -0.077346    | 0.846683     | 0.345152     | 0.132*                           |           |
| H9C  | -0.046238    | 0.850172     | 0.271075     | 0.132*                           |           |
| C10  | 0.41940 (11) | 0.39575 (16) | 0.30850 (5)  | 0.0361 (2)                       |           |
| C11  | 0.42985 (11) | 0.24834 (15) | 0.44824 (4)  | 0.0338 (2)                       |           |

*Atomic displacement parameters (Å<sup>2</sup>) for 4d2a.*

|     | $U^{11}$    | $U^{22}$    | $U^{33}$    | $U^{12}$     | $U^{13}$     | $U^{23}$     |
|-----|-------------|-------------|-------------|--------------|--------------|--------------|
| O1  | 0.0359 (4)  | 0.0377 (4)  | 0.0323 (4)  | 0.0016 (3)   | 0.0111 (3)   | 0.0049 (3)   |
| O2  | 0.0446 (4)  | 0.0403 (4)  | 0.0377 (4)  | -0.0007 (3)  | 0.0141 (3)   | 0.0052 (3)   |
| N1  | 0.0509 (6)  | 0.0611 (7)  | 0.0412 (5)  | -0.0058 (5)  | 0.0087 (4)   | -0.0151 (5)  |
| N2  | 0.0445 (5)  | 0.0435 (5)  | 0.0419 (5)  | 0.0095 (4)   | 0.0158 (4)   | 0.0114 (4)   |
| C1  | 0.0315 (10) | 0.0638 (14) | 0.0696 (14) | -0.0065 (9)  | 0.0111 (9)   | 0.0015 (11)  |
| C2  | 0.0314 (17) | 0.051 (2)   | 0.0513 (14) | -0.0067 (15) | 0.0088 (11)  | 0.0026 (18)  |
| C1B | 0.0344 (15) | 0.067 (2)   | 0.066 (2)   | 0.0045 (13)  | 0.0054 (13)  | 0.0137 (16)  |
| C2B | 0.025 (2)   | 0.053 (4)   | 0.052 (2)   | -0.005 (2)   | -0.0013 (16) | 0.013 (3)    |
| C3  | 0.0365 (5)  | 0.0472 (6)  | 0.0345 (5)  | 0.0040 (4)   | 0.0110 (4)   | 0.0028 (4)   |
| C4  | 0.0340 (5)  | 0.0398 (5)  | 0.0326 (5)  | -0.0038 (4)  | 0.0061 (4)   | -0.0020 (4)  |
| C5  | 0.0346 (5)  | 0.0351 (5)  | 0.0261 (4)  | -0.0032 (4)  | 0.0072 (4)   | -0.0006 (4)  |
| C6  | 0.0427 (6)  | 0.0342 (5)  | 0.0335 (5)  | -0.0007 (4)  | 0.0068 (4)   | 0.0012 (4)   |
| C7  | 0.0514 (7)  | 0.0456 (7)  | 0.0633 (8)  | 0.0071 (5)   | -0.0148 (6)  | -0.0062 (6)  |
| C8  | 0.0563 (7)  | 0.0517 (7)  | 0.0602 (8)  | 0.0122 (6)   | 0.0021 (6)   | 0.0053 (6)   |
| C9  | 0.0733 (10) | 0.0801 (11) | 0.1014 (13) | 0.0339 (9)   | -0.0364 (9)  | -0.0165 (10) |
| C10 | 0.0359 (5)  | 0.0412 (5)  | 0.0320 (5)  | -0.0024 (4)  | 0.0071 (4)   | -0.0021 (4)  |
| C11 | 0.0406 (5)  | 0.0341 (5)  | 0.0276 (4)  | 0.0006 (4)   | 0.0077 (4)   | -0.0012 (4)  |

*Geometric parameters (Å, °) for 4d2a.*

|          |             |          |             |
|----------|-------------|----------|-------------|
| O1—C11   | 1.3566 (12) | C2B—H2BB | 0.9900      |
| O1—C5    | 1.4513 (11) | C3—C4    | 1.5171 (15) |
| O2—C11   | 1.2242 (12) | C3—H3    | 1.0019      |
| N1—C10   | 1.1406 (14) | C4—C5    | 1.5185 (13) |
| N2—C11   | 1.3276 (13) | C4—H4A   | 0.9900      |
| N2—C3    | 1.4685 (13) | C4—H4B   | 0.9900      |
| N2—H2    | 0.8316      | C5—C10   | 1.4915 (13) |
| C1—C2    | 1.535 (5)   | C5—C6    | 1.5246 (14) |
| C1—H1A   | 0.9800      | C6—C7    | 1.5215 (16) |
| C1—H1B   | 0.9800      | C6—H6A   | 0.9900      |
| C1—H1C   | 0.9800      | C6—H6B   | 0.9900      |
| C2—C3    | 1.467 (6)   | C7—C8    | 1.5007 (17) |
| C2—H2A   | 0.9900      | C7—H7A   | 0.9900      |
| C2—H2B   | 0.9900      | C7—H7B   | 0.9900      |
| C1B—C2B  | 1.495 (8)   | C8—C9    | 1.510 (2)   |
| C1B—H1BA | 0.9800      | C8—H8A   | 0.9900      |
| C1B—H1BB | 0.9800      | C8—H8B   | 0.9900      |
| C1B—H1BC | 0.9800      | C9—H9A   | 0.9800      |

|               |             |            |             |
|---------------|-------------|------------|-------------|
| C2B—C3        | 1.643 (7)   | C9—H9B     | 0.9800      |
| C2B—H2BA      | 0.9900      | C9—H9C     | 0.9800      |
|               |             |            |             |
| C11—O1—C5     | 119.98 (7)  | C5—C4—H4A  | 109.3       |
| C11—N2—C3     | 127.85 (9)  | C3—C4—H4B  | 109.3       |
| C11—N2—H2     | 114.0       | C5—C4—H4B  | 109.3       |
| C3—N2—H2      | 118.1       | H4A—C4—H4B | 108.0       |
| C2—C1—H1A     | 109.5       | O1—C5—C10  | 106.62 (8)  |
| C2—C1—H1B     | 109.5       | O1—C5—C4   | 110.40 (8)  |
| H1A—C1—H1B    | 109.5       | C10—C5—C4  | 110.09 (8)  |
| C2—C1—H1C     | 109.5       | O1—C5—C6   | 105.26 (7)  |
| H1A—C1—H1C    | 109.5       | C10—C5—C6  | 110.68 (8)  |
| H1B—C1—H1C    | 109.5       | C4—C5—C6   | 113.47 (8)  |
| C3—C2—C1      | 110.6 (4)   | C7—C6—C5   | 113.79 (9)  |
| C3—C2—H2A     | 109.5       | C7—C6—H6A  | 108.8       |
| C1—C2—H2A     | 109.5       | C5—C6—H6A  | 108.8       |
| C3—C2—H2B     | 109.5       | C7—C6—H6B  | 108.8       |
| C1—C2—H2B     | 109.5       | C5—C6—H6B  | 108.8       |
| H2A—C2—H2B    | 108.1       | H6A—C6—H6B | 107.7       |
| C2B—C1B—H1BA  | 109.5       | C8—C7—C6   | 114.87 (11) |
| C2B—C1B—H1BB  | 109.5       | C8—C7—H7A  | 108.6       |
| H1BA—C1B—H1BB | 109.5       | C6—C7—H7A  | 108.6       |
| C2B—C1B—H1BC  | 109.5       | C8—C7—H7B  | 108.6       |
| H1BA—C1B—H1BC | 109.5       | C6—C7—H7B  | 108.6       |
| H1BB—C1B—H1BC | 109.5       | H7A—C7—H7B | 107.5       |
| C1B—C2B—C3    | 112.4 (4)   | C7—C8—C9   | 113.19 (13) |
| C1B—C2B—H2BA  | 109.1       | C7—C8—H8A  | 108.9       |
| C3—C2B—H2BA   | 109.1       | C9—C8—H8A  | 108.9       |
| C1B—C2B—H2BB  | 109.1       | C7—C8—H8B  | 108.9       |
| C3—C2B—H2BB   | 109.1       | C9—C8—H8B  | 108.9       |
| H2BA—C2B—H2BB | 107.9       | H8A—C8—H8B | 107.8       |
| C2—C3—N2      | 104.5 (2)   | C8—C9—H9A  | 109.5       |
| C2—C3—C4      | 118.62 (19) | C8—C9—H9B  | 109.5       |
| N2—C3—C4      | 108.52 (8)  | H9A—C9—H9B | 109.5       |
| N2—C3—C2B     | 115.6 (3)   | C8—C9—H9C  | 109.5       |
| C4—C3—C2B     | 104.0 (3)   | H9A—C9—H9C | 109.5       |
| C2—C3—H3      | 109.2       | H9B—C9—H9C | 109.5       |
| N2—C3—H3      | 106.5       | N1—C10—C5  | 179.16 (12) |
| C4—C3—H3      | 108.8       | O2—C11—N2  | 124.77 (10) |
| C2B—C3—H3     | 113.1       | O2—C11—O1  | 116.40 (9)  |
| C3—C4—C5      | 111.46 (8)  | N2—C11—O1  | 118.82 (9)  |

|           |       |  |  |
|-----------|-------|--|--|
| C3—C4—H4A | 109.3 |  |  |
|-----------|-------|--|--|

Document origin: *publCIF* [Westrip, S. P. (2010). *J. Apply. Cryst.*, **43**, 920-925].

## Computational details

Data collection: Bruker Instrument Service v8.5.1.2 Release; cell refinement: *SAINT* V8.40B (Bruker AXS LLC, 2019); data reduction: *SAINT* V8.40B (Bruker AXS LLC, 2019); program(s) used to solve structure: *SHELXT* 2018/2 (Sheldrick, 2018); program(s) used to refine structure: *SHELXL2019/2* (Sheldrick, 2019).

## Compound 4h2

### Crystal data

|                                 |                                                         |
|---------------------------------|---------------------------------------------------------|
| $C_{16}H_{18}N_2O_2$            | $Z = 4$                                                 |
| $M_r = 270.32$                  | $F(000) = 576$                                          |
| Triclinic, $P\bar{1}$           | $D_x = 1.458 \text{ Mg m}^{-3}$                         |
| $a = 8.2209 (3) \text{ \AA}$    | Cu $K\alpha$ radiation, $\lambda = 1.54178 \text{ \AA}$ |
| $b = 11.6407 (4) \text{ \AA}$   | Cell parameters from 9927 reflections                   |
| $c = 13.6236 (5) \text{ \AA}$   | $\theta = 3.3\text{--}68.2^\circ$                       |
| $\alpha = 83.587 (1)^\circ$     | $\mu = 0.78 \text{ mm}^{-1}$                            |
| $\beta = 81.241 (1)^\circ$      | $T = 120 \text{ K}$                                     |
| $\gamma = 73.437 (1)^\circ$     | Plate, colourless                                       |
| $V = 1231.86 (8) \text{ \AA}^3$ | $0.42 \times 0.21 \times 0.10 \text{ mm}$               |

### Data collection

|                                                                                                                                                                                                                                                                                             |                                                                        |
|---------------------------------------------------------------------------------------------------------------------------------------------------------------------------------------------------------------------------------------------------------------------------------------------|------------------------------------------------------------------------|
| Bruker D8 VENTURE Kappa Duo PHOTONIII CMOS diffractometer                                                                                                                                                                                                                                   | 4444 independent reflections                                           |
| Radiation source: I $\mu$ S micro-focus sealed tube                                                                                                                                                                                                                                         | 4176 reflections with $I > 2\sigma(I)$                                 |
| Helios Cu multilayer optic monochromator                                                                                                                                                                                                                                                    | $R_{\text{int}} = 0.027$                                               |
| $\phi$ and $\omega$ scans                                                                                                                                                                                                                                                                   | $\theta_{\text{max}} = 68.2^\circ$ , $\theta_{\text{min}} = 3.3^\circ$ |
| Absorption correction: multi-scan<br>Krause, L., Herbst-Irmer, R., Sheldrick, G. M., Stalke, D. (2015). "Comparison of silver and molybdenum microfocus X-ray sources for single-crystal structure determination" <i>J. Appl. Cryst.</i> <b>48</b> , 3-10.<br>doi:10.1107/S1600576714022985 | $h = -9 \rightarrow 9$                                                 |
| $T_{\text{min}} = 0.78$ , $T_{\text{max}} = 0.93$                                                                                                                                                                                                                                           | $k = -14 \rightarrow 14$                                               |
| 15385 measured reflections                                                                                                                                                                                                                                                                  | $l = -16 \rightarrow 15$                                               |

## Refinement

|                                 |                                                                                     |
|---------------------------------|-------------------------------------------------------------------------------------|
| Refinement on $F^2$             | Primary atom site location: structure-invariant direct methods                      |
| Least-squares matrix: full      | Secondary atom site location: difference Fourier map                                |
| $R[F^2 > 2\sigma(F^2)] = 0.035$ | Hydrogen site location: mixed                                                       |
| $wR(F^2) = 0.099$               | H-atom parameters constrained                                                       |
| $S = 1.03$                      | $w = 1/[\sigma^2(F_o^2) + (0.0481P)^2 + 0.5741P]$<br>where $P = (F_o^2 + 2F_c^2)/3$ |
| 4444 reflections                | $(\Delta/\sigma)_{\max} = 0.001$                                                    |
| 361 parameters                  | $\Delta_{\max} = 0.31 \text{ e } \text{\AA}^{-3}$                                   |
| 0 restraints                    | $\Delta_{\min} = -0.20 \text{ e } \text{\AA}^{-3}$                                  |

## Special details

*Geometry.* All esds (except the esd in the dihedral angle between two l.s. planes) are estimated using the full covariance matrix. The cell esds are taken into account individually in the estimation of esds in distances, angles and torsion angles; correlations between esds in cell parameters are only used when they are defined by crystal symmetry. An approximate (isotropic) treatment of cell esds is used for estimating esds involving l.s. planes.

*Fractional atomic coordinates and isotropic or equivalent isotropic displacement parameters ( $\text{\AA}^2$ ) for 4h2.*

|      | $x$          | $y$          | $z$         | $U_{\text{iso}}^*/U_{\text{eq}}$ |
|------|--------------|--------------|-------------|----------------------------------|
| O1A  | 0.88783 (11) | 0.94049 (7)  | 0.57155 (6) | 0.0163 (2)                       |
| O2A  | 0.67173 (11) | 1.06765 (8)  | 0.49683 (7) | 0.0202 (2)                       |
| N1A  | 1.12792 (15) | 0.74735 (11) | 0.40787 (8) | 0.0262 (3)                       |
| N2A  | 0.69450 (13) | 0.86314 (9)  | 0.52322 (7) | 0.0149 (2)                       |
| H2A  | 0.577884     | 0.873994     | 0.514034    | 0.018*                           |
| C1A  | 0.68466 (15) | 0.79889 (10) | 0.70194 (9) | 0.0139 (2)                       |
| H1A  | 0.653661     | 0.887297     | 0.709326    | 0.017*                           |
| C2A  | 0.78237 (15) | 0.77307 (11) | 0.59666 (8) | 0.0134 (2)                       |
| C3A  | 0.94966 (15) | 0.81057 (11) | 0.58108 (9) | 0.0150 (3)                       |
| C4A  | 1.06031 (15) | 0.75340 (11) | 0.66361 (9) | 0.0167 (3)                       |
| H4A  | 1.166245     | 0.781387     | 0.654653    | 0.020*                           |
| C5A  | 1.10575 (16) | 0.61644 (11) | 0.65242 (9) | 0.0183 (3)                       |
| H5AA | 1.172393     | 0.597960     | 0.586450    | 0.022*                           |
| H5AB | 1.177540     | 0.572657     | 0.704167    | 0.022*                           |
| C6A  | 0.94229 (15) | 0.57417 (11) | 0.66272 (9) | 0.0165 (3)                       |
| H6A  | 0.976079     | 0.485700     | 0.655189    | 0.020*                           |
| C7A  | 0.82219 (16) | 0.63840 (11) | 0.58294 (9) | 0.0158 (3)                       |
| H7A  | 0.883309     | 0.620888     | 0.514702    | 0.019*                           |

|      |              |              |              |            |
|------|--------------|--------------|--------------|------------|
| C8A  | 0.65891 (17) | 0.59635 (11) | 0.59924 (10) | 0.0195 (3) |
| H8AA | 0.688741     | 0.508950     | 0.591507     | 0.023*     |
| H8AB | 0.583373     | 0.638298     | 0.548715     | 0.023*     |
| C9A  | 0.56482 (16) | 0.62314 (11) | 0.70382 (10) | 0.0189 (3) |
| H9A  | 0.457711     | 0.596476     | 0.713857     | 0.023*     |
| C10A | 0.68121 (16) | 0.55649 (11) | 0.78198 (10) | 0.0197 (3) |
| H10A | 0.620083     | 0.572720     | 0.849577     | 0.024*     |
| H10B | 0.711128     | 0.468851     | 0.775348     | 0.024*     |
| C11A | 0.84446 (16) | 0.59796 (11) | 0.76776 (9)  | 0.0161 (3) |
| H11A | 0.919682     | 0.553168     | 0.818601     | 0.019*     |
| C12A | 0.80053 (16) | 0.73359 (11) | 0.78045 (9)  | 0.0157 (3) |
| H12A | 0.737246     | 0.750522     | 0.848309     | 0.019*     |
| C13A | 0.95970 (16) | 0.78016 (11) | 0.76659 (9)  | 0.0175 (3) |
| H13C | 0.924925     | 0.867896     | 0.773428     | 0.021*     |
| H13D | 1.033224     | 0.740979     | 0.818777     | 0.021*     |
| C14A | 0.52005 (15) | 0.75865 (11) | 0.71441 (9)  | 0.0169 (3) |
| H14C | 0.455373     | 0.777582     | 0.780782     | 0.020*     |
| H14D | 0.447061     | 0.802432     | 0.663208     | 0.020*     |
| C15A | 1.04979 (16) | 0.77568 (11) | 0.48237 (9)  | 0.0183 (3) |
| C16A | 0.74096 (15) | 0.96586 (11) | 0.52677 (8)  | 0.0156 (3) |
| O1B  | 0.38411 (11) | 0.43140 (8)  | 0.86772 (6)  | 0.0172 (2) |
| O2B  | 0.16847 (11) | 0.56109 (8)  | 0.95524 (7)  | 0.0218 (2) |
| N1B  | 0.62731 (15) | 0.23549 (11) | 1.02103 (9)  | 0.0252 (3) |
| N2B  | 0.18899 (13) | 0.35643 (9)  | 0.96733 (7)  | 0.0155 (2) |
| H2B  | 0.079831     | 0.364596     | 0.995302     | 0.019*     |
| C1B  | 0.17417 (15) | 0.29345 (11) | 0.80324 (9)  | 0.0145 (3) |
| H1B  | 0.144961     | 0.381853     | 0.784701     | 0.017*     |
| C2B  | 0.27372 (15) | 0.26617 (11) | 0.89487 (9)  | 0.0136 (3) |
| C3B  | 0.44237 (15) | 0.30143 (11) | 0.87142 (9)  | 0.0149 (3) |
| C4B  | 0.54958 (15) | 0.24366 (11) | 0.77900 (9)  | 0.0167 (3) |
| H4B  | 0.656596     | 0.270248     | 0.762405     | 0.020*     |
| C5B  | 0.59266 (15) | 0.10714 (11) | 0.80779 (9)  | 0.0173 (3) |
| H5BA | 0.662912     | 0.063066     | 0.750941     | 0.021*     |
| H5BB | 0.660300     | 0.087853     | 0.864614     | 0.021*     |
| C6B  | 0.42787 (15) | 0.06636 (11) | 0.83654 (9)  | 0.0159 (3) |
| H6B  | 0.460198     | -0.022133    | 0.854696     | 0.019*     |
| C7B  | 0.31072 (15) | 0.13156 (11) | 0.92658 (9)  | 0.0151 (3) |
| H7B  | 0.373234     | 0.112972     | 0.986403     | 0.018*     |
| C8B  | 0.14568 (16) | 0.09171 (11) | 0.94975 (9)  | 0.0185 (3) |
| H8BA | 0.173691     | 0.004342     | 0.968738     | 0.022*     |
| H8BB | 0.072033     | 0.134309     | 1.006396     | 0.022*     |

|      |              |              |              |            |
|------|--------------|--------------|--------------|------------|
| C9B  | 0.05011 (16) | 0.11988 (11) | 0.85803 (10) | 0.0185 (3) |
| H9B  | -0.058179    | 0.094764     | 0.873587     | 0.022*     |
| C10B | 0.16341 (16) | 0.05183 (11) | 0.77087 (10) | 0.0195 (3) |
| H10C | 0.191915     | -0.035701    | 0.789136     | 0.023*     |
| H10D | 0.100831     | 0.068419     | 0.711985     | 0.023*     |
| C11B | 0.32840 (16) | 0.09164 (11) | 0.74552 (9)  | 0.0166 (3) |
| H11B | 0.401720     | 0.046500     | 0.689036     | 0.020*     |
| C12B | 0.28663 (16) | 0.22740 (11) | 0.71541 (9)  | 0.0161 (3) |
| H12B | 0.221916     | 0.245426     | 0.656499     | 0.019*     |
| C13B | 0.44755 (16) | 0.27187 (12) | 0.69000 (9)  | 0.0184 (3) |
| H13A | 0.519396     | 0.232123     | 0.631552     | 0.022*     |
| H13B | 0.414568     | 0.359634     | 0.672812     | 0.022*     |
| C14B | 0.00785 (15) | 0.25540 (11) | 0.82982 (9)  | 0.0172 (3) |
| H14A | -0.063260    | 0.299640     | 0.886357     | 0.021*     |
| H14B | -0.057956    | 0.275227     | 0.772188     | 0.021*     |
| C15B | 0.54490 (15) | 0.26502 (11) | 0.95730 (9)  | 0.0174 (3) |
| C16B | 0.23643 (15) | 0.45898 (11) | 0.93420 (9)  | 0.0163 (3) |

*Atomic displacement parameters ( $\text{\AA}^2$ ) for 4h2.*

|      | $U^{11}$   | $U^{22}$   | $U^{33}$   | $U^{12}$    | $U^{13}$    | $U^{23}$    |
|------|------------|------------|------------|-------------|-------------|-------------|
| O1A  | 0.0157 (4) | 0.0153 (4) | 0.0179 (4) | -0.0046 (3) | -0.0041 (3) | 0.0021 (3)  |
| O2A  | 0.0203 (5) | 0.0171 (5) | 0.0222 (5) | -0.0041 (4) | -0.0055 (4) | 0.0043 (4)  |
| N1A  | 0.0206 (6) | 0.0357 (7) | 0.0204 (6) | -0.0064 (5) | 0.0011 (5)  | -0.0019 (5) |
| N2A  | 0.0147 (5) | 0.0163 (5) | 0.0137 (5) | -0.0036 (4) | -0.0044 (4) | 0.0016 (4)  |
| C1A  | 0.0144 (6) | 0.0130 (6) | 0.0132 (6) | -0.0023 (4) | -0.0011 (4) | -0.0009 (4) |
| C2A  | 0.0127 (6) | 0.0146 (6) | 0.0127 (6) | -0.0029 (4) | -0.0036 (4) | 0.0002 (4)  |
| C3A  | 0.0149 (6) | 0.0151 (6) | 0.0145 (6) | -0.0035 (5) | -0.0018 (5) | 0.0001 (4)  |
| C4A  | 0.0134 (6) | 0.0189 (6) | 0.0185 (6) | -0.0053 (5) | -0.0047 (5) | 0.0016 (5)  |
| C5A  | 0.0145 (6) | 0.0190 (6) | 0.0192 (6) | -0.0013 (5) | -0.0029 (5) | 0.0007 (5)  |
| C6A  | 0.0155 (6) | 0.0136 (6) | 0.0189 (6) | -0.0010 (5) | -0.0029 (5) | -0.0011 (5) |
| C7A  | 0.0174 (6) | 0.0151 (6) | 0.0144 (6) | -0.0026 (5) | -0.0024 (5) | -0.0029 (4) |
| C8A  | 0.0217 (7) | 0.0166 (6) | 0.0230 (6) | -0.0068 (5) | -0.0076 (5) | -0.0019 (5) |
| C9A  | 0.0149 (6) | 0.0186 (6) | 0.0245 (7) | -0.0075 (5) | -0.0040 (5) | 0.0026 (5)  |
| C10A | 0.0193 (6) | 0.0170 (6) | 0.0220 (6) | -0.0056 (5) | -0.0028 (5) | 0.0039 (5)  |
| C11A | 0.0168 (6) | 0.0152 (6) | 0.0157 (6) | -0.0035 (5) | -0.0046 (5) | 0.0028 (4)  |
| C12A | 0.0177 (6) | 0.0171 (6) | 0.0118 (5) | -0.0043 (5) | -0.0022 (4) | -0.0002 (4) |
| C13A | 0.0199 (6) | 0.0185 (6) | 0.0156 (6) | -0.0057 (5) | -0.0070 (5) | 0.0000 (5)  |
| C14A | 0.0132 (6) | 0.0179 (6) | 0.0181 (6) | -0.0033 (5) | -0.0013 (5) | 0.0015 (5)  |
| C15A | 0.0144 (6) | 0.0202 (6) | 0.0193 (6) | -0.0042 (5) | -0.0034 (5) | 0.0024 (5)  |
| C16A | 0.0149 (6) | 0.0195 (6) | 0.0114 (5) | -0.0043 (5) | -0.0002 (4) | 0.0000 (4)  |

|      |            |            |            |             |             |             |
|------|------------|------------|------------|-------------|-------------|-------------|
| O1B  | 0.0165 (4) | 0.0146 (4) | 0.0200 (4) | -0.0048 (3) | 0.0018 (3)  | -0.0030 (3) |
| O2B  | 0.0202 (5) | 0.0174 (5) | 0.0273 (5) | -0.0042 (4) | 0.0003 (4)  | -0.0073 (4) |
| N1B  | 0.0227 (6) | 0.0288 (6) | 0.0250 (6) | -0.0059 (5) | -0.0068 (5) | -0.0042 (5) |
| N2B  | 0.0147 (5) | 0.0168 (5) | 0.0144 (5) | -0.0043 (4) | 0.0016 (4)  | -0.0033 (4) |
| C1B  | 0.0151 (6) | 0.0134 (6) | 0.0141 (6) | -0.0023 (5) | -0.0027 (5) | -0.0004 (4) |
| C2B  | 0.0128 (6) | 0.0146 (6) | 0.0127 (5) | -0.0029 (5) | -0.0002 (4) | -0.0018 (4) |
| C3B  | 0.0146 (6) | 0.0139 (6) | 0.0161 (6) | -0.0035 (5) | -0.0014 (5) | -0.0020 (4) |
| C4B  | 0.0134 (6) | 0.0188 (6) | 0.0181 (6) | -0.0057 (5) | 0.0023 (5)  | -0.0042 (5) |
| C5B  | 0.0128 (6) | 0.0179 (6) | 0.0205 (6) | -0.0017 (5) | -0.0015 (5) | -0.0055 (5) |
| C6B  | 0.0142 (6) | 0.0140 (6) | 0.0189 (6) | -0.0022 (5) | -0.0029 (5) | -0.0023 (5) |
| C7B  | 0.0152 (6) | 0.0152 (6) | 0.0145 (6) | -0.0038 (5) | -0.0028 (4) | 0.0005 (5)  |
| C8B  | 0.0186 (6) | 0.0178 (6) | 0.0194 (6) | -0.0073 (5) | -0.0008 (5) | 0.0019 (5)  |
| C9B  | 0.0143 (6) | 0.0195 (6) | 0.0232 (6) | -0.0072 (5) | -0.0017 (5) | -0.0022 (5) |
| C10B | 0.0184 (6) | 0.0183 (6) | 0.0236 (6) | -0.0051 (5) | -0.0057 (5) | -0.0039 (5) |
| C11B | 0.0162 (6) | 0.0166 (6) | 0.0168 (6) | -0.0026 (5) | -0.0022 (5) | -0.0052 (5) |
| C12B | 0.0170 (6) | 0.0181 (6) | 0.0131 (6) | -0.0036 (5) | -0.0027 (4) | -0.0021 (5) |
| C13B | 0.0208 (6) | 0.0196 (6) | 0.0138 (6) | -0.0060 (5) | 0.0021 (5)  | -0.0021 (5) |
| C14B | 0.0131 (6) | 0.0194 (6) | 0.0184 (6) | -0.0022 (5) | -0.0035 (5) | -0.0024 (5) |
| C15B | 0.0144 (6) | 0.0175 (6) | 0.0207 (6) | -0.0051 (5) | 0.0008 (5)  | -0.0050 (5) |
| C16B | 0.0154 (6) | 0.0188 (6) | 0.0145 (6) | -0.0035 (5) | -0.0030 (4) | -0.0027 (5) |

*Geometric parameters (Å, °) for 4h2.*

|          |             |          |             |
|----------|-------------|----------|-------------|
| O1A—C16A | 1.3777 (15) | O1B—C16B | 1.3802 (15) |
| O1A—C3A  | 1.4492 (14) | O1B—C3B  | 1.4485 (14) |
| O2A—C16A | 1.2135 (15) | O2B—C16B | 1.2066 (16) |
| N1A—C15A | 1.1431 (17) | N1B—C15B | 1.1449 (17) |
| N2A—C16A | 1.3627 (16) | N2B—C16B | 1.3683 (16) |
| N2A—C2A  | 1.4752 (15) | N2B—C2B  | 1.4726 (15) |
| N2A—H2A  | 0.9564      | N2B—H2B  | 0.9027      |
| C1A—C12A | 1.5313 (16) | C1B—C12B | 1.5300 (16) |
| C1A—C14A | 1.5340 (16) | C1B—C14B | 1.5347 (16) |
| C1A—C2A  | 1.5493 (16) | C1B—C2B  | 1.5503 (16) |
| C1A—H1A  | 1.0000      | C1B—H1B  | 1.0000      |
| C2A—C7A  | 1.5342 (16) | C2B—C7B  | 1.5335 (16) |
| C2A—C3A  | 1.5362 (16) | C2B—C3B  | 1.5339 (16) |
| C3A—C15A | 1.4985 (17) | C3B—C15B | 1.4982 (17) |
| C3A—C4A  | 1.5276 (16) | C3B—C4B  | 1.5256 (16) |
| C4A—C13A | 1.5320 (17) | C4B—C13B | 1.5315 (17) |
| C4A—C5A  | 1.5499 (17) | C4B—C5B  | 1.5450 (17) |
| C4A—H4A  | 1.0000      | C4B—H4B  | 1.0000      |

|               |             |               |             |
|---------------|-------------|---------------|-------------|
| C5A—C6A       | 1.5401 (17) | C5B—C6B       | 1.5419 (16) |
| C5A—H5AA      | 0.9900      | C5B—H5BA      | 0.9900      |
| C5A—H5AB      | 0.9900      | C5B—H5BB      | 0.9900      |
| C6A—C11A      | 1.5435 (17) | C6B—C11B      | 1.5437 (16) |
| C6A—C7A       | 1.5618 (16) | C6B—C7B       | 1.5619 (16) |
| C6A—H6A       | 1.0000      | C6B—H6B       | 1.0000      |
| C7A—C8A       | 1.5332 (17) | C7B—C8B       | 1.5334 (16) |
| C7A—H7A       | 1.0000      | C7B—H7B       | 1.0000      |
| C8A—C9A       | 1.5335 (18) | C8B—C9B       | 1.5319 (17) |
| C8A—H8AA      | 0.9900      | C8B—H8BA      | 0.9900      |
| C8A—H8AB      | 0.9900      | C8B—H8BB      | 0.9900      |
| C9A—C14A      | 1.5324 (17) | C9B—C14B      | 1.5329 (17) |
| C9A—C10A      | 1.5342 (17) | C9B—C10B      | 1.5354 (17) |
| C9A—H9A       | 1.0000      | C9B—H9B       | 1.0000      |
| C10A—C11A     | 1.5301 (17) | C10B—C11B     | 1.5342 (17) |
| C10A—H10A     | 0.9900      | C10B—H10C     | 0.9900      |
| C10A—H10B     | 0.9900      | C10B—H10D     | 0.9900      |
| C11A—C12A     | 1.5394 (17) | C11B—C12B     | 1.5402 (16) |
| C11A—H11A     | 1.0000      | C11B—H11B     | 1.0000      |
| C12A—C13A     | 1.5323 (17) | C12B—C13B     | 1.5326 (17) |
| C12A—H12A     | 1.0000      | C12B—H12B     | 1.0000      |
| C13A—H13C     | 0.9900      | C13B—H13A     | 0.9900      |
| C13A—H13D     | 0.9900      | C13B—H13B     | 0.9900      |
| C14A—H14C     | 0.9900      | C14B—H14A     | 0.9900      |
| C14A—H14D     | 0.9900      | C14B—H14B     | 0.9900      |
|               |             |               |             |
| C16A—O1A—C3A  | 105.69 (9)  | C16B—O1B—C3B  | 105.93 (9)  |
| C16A—N2A—C2A  | 107.55 (9)  | C16B—N2B—C2B  | 107.38 (9)  |
| C16A—N2A—H2A  | 115.7       | C16B—N2B—H2B  | 117.6       |
| C2A—N2A—H2A   | 123.0       | C2B—N2B—H2B   | 121.4       |
| C12A—C1A—C14A | 111.25 (10) | C12B—C1B—C14B | 111.11 (10) |
| C12A—C1A—C2A  | 109.38 (9)  | C12B—C1B—C2B  | 109.56 (9)  |
| C14A—C1A—C2A  | 109.55 (10) | C14B—C1B—C2B  | 109.53 (9)  |
| C12A—C1A—H1A  | 108.9       | C12B—C1B—H1B  | 108.9       |
| C14A—C1A—H1A  | 108.9       | C14B—C1B—H1B  | 108.9       |
| C2A—C1A—H1A   | 108.9       | C2B—C1B—H1B   | 108.9       |
| N2A—C2A—C7A   | 120.50 (10) | N2B—C2B—C7B   | 120.67 (10) |
| N2A—C2A—C3A   | 96.64 (9)   | N2B—C2B—C3B   | 96.76 (9)   |
| C7A—C2A—C3A   | 109.58 (9)  | C7B—C2B—C3B   | 109.65 (9)  |
| N2A—C2A—C1A   | 108.96 (9)  | N2B—C2B—C1B   | 108.89 (9)  |
| C7A—C2A—C1A   | 109.11 (9)  | C7B—C2B—C1B   | 108.91 (10) |

|               |             |               |             |
|---------------|-------------|---------------|-------------|
| C3A—C2A—C1A   | 111.46 (9)  | C3B—C2B—C1B   | 111.41 (9)  |
| O1A—C3A—C15A  | 105.43 (9)  | O1B—C3B—C15B  | 105.34 (9)  |
| O1A—C3A—C4A   | 117.78 (10) | O1B—C3B—C4B   | 117.72 (10) |
| C15A—C3A—C4A  | 109.15 (10) | C15B—C3B—C4B  | 109.05 (10) |
| O1A—C3A—C2A   | 102.07 (9)  | O1B—C3B—C2B   | 102.25 (9)  |
| C15A—C3A—C2A  | 110.85 (10) | C15B—C3B—C2B  | 111.09 (10) |
| C4A—C3A—C2A   | 111.25 (9)  | C4B—C3B—C2B   | 111.12 (10) |
| C3A—C4A—C13A  | 111.11 (10) | C3B—C4B—C13B  | 111.41 (10) |
| C3A—C4A—C5A   | 104.66 (10) | C3B—C4B—C5B   | 104.71 (9)  |
| C13A—C4A—C5A  | 108.84 (10) | C13B—C4B—C5B  | 108.92 (10) |
| C3A—C4A—H4A   | 110.7       | C3B—C4B—H4B   | 110.5       |
| C13A—C4A—H4A  | 110.7       | C13B—C4B—H4B  | 110.5       |
| C5A—C4A—H4A   | 110.7       | C5B—C4B—H4B   | 110.5       |
| C6A—C5A—C4A   | 110.66 (10) | C6B—C5B—C4B   | 110.75 (9)  |
| C6A—C5A—H5AA  | 109.5       | C6B—C5B—H5BA  | 109.5       |
| C4A—C5A—H5AA  | 109.5       | C4B—C5B—H5BA  | 109.5       |
| C6A—C5A—H5AB  | 109.5       | C6B—C5B—H5BB  | 109.5       |
| C4A—C5A—H5AB  | 109.5       | C4B—C5B—H5BB  | 109.5       |
| H5AA—C5A—H5AB | 108.1       | H5BA—C5B—H5BB | 108.1       |
| C5A—C6A—C11A  | 108.84 (10) | C5B—C6B—C11B  | 108.75 (10) |
| C5A—C6A—C7A   | 112.77 (10) | C5B—C6B—C7B   | 112.46 (10) |
| C11A—C6A—C7A  | 109.37 (9)  | C11B—C6B—C7B  | 109.47 (9)  |
| C5A—C6A—H6A   | 108.6       | C5B—C6B—H6B   | 108.7       |
| C11A—C6A—H6A  | 108.6       | C11B—C6B—H6B  | 108.7       |
| C7A—C6A—H6A   | 108.6       | C7B—C6B—H6B   | 108.7       |
| C8A—C7A—C2A   | 111.48 (10) | C8B—C7B—C2B   | 111.56 (10) |
| C8A—C7A—C6A   | 110.44 (10) | C8B—C7B—C6B   | 110.51 (10) |
| C2A—C7A—C6A   | 105.31 (9)  | C2B—C7B—C6B   | 105.52 (9)  |
| C8A—C7A—H7A   | 109.8       | C8B—C7B—H7B   | 109.7       |
| C2A—C7A—H7A   | 109.8       | C2B—C7B—H7B   | 109.7       |
| C6A—C7A—H7A   | 109.8       | C6B—C7B—H7B   | 109.7       |
| C7A—C8A—C9A   | 109.97 (10) | C9B—C8B—C7B   | 109.74 (10) |
| C7A—C8A—H8AA  | 109.7       | C9B—C8B—H8BA  | 109.7       |
| C9A—C8A—H8AA  | 109.7       | C7B—C8B—H8BA  | 109.7       |
| C7A—C8A—H8AB  | 109.7       | C9B—C8B—H8BB  | 109.7       |
| C9A—C8A—H8AB  | 109.7       | C7B—C8B—H8BB  | 109.7       |
| H8AA—C8A—H8AB | 108.2       | H8BA—C8B—H8BB | 108.2       |
| C14A—C9A—C8A  | 108.89 (10) | C8B—C9B—C14B  | 108.95 (10) |
| C14A—C9A—C10A | 109.23 (10) | C8B—C9B—C10B  | 109.59 (10) |
| C8A—C9A—C10A  | 109.54 (10) | C14B—C9B—C10B | 109.52 (10) |
| C14A—C9A—H9A  | 109.7       | C8B—C9B—H9B   | 109.6       |

|                |             |                |             |
|----------------|-------------|----------------|-------------|
| C8A—C9A—H9A    | 109.7       | C14B—C9B—H9B   | 109.6       |
| C10A—C9A—H9A   | 109.7       | C10B—C9B—H9B   | 109.6       |
| C11A—C10A—C9A  | 109.97 (10) | C11B—C10B—C9B  | 109.81 (10) |
| C11A—C10A—H10A | 109.7       | C11B—C10B—H10C | 109.7       |
| C9A—C10A—H10A  | 109.7       | C9B—C10B—H10C  | 109.7       |
| C11A—C10A—H10B | 109.7       | C11B—C10B—H10D | 109.7       |
| C9A—C10A—H10B  | 109.7       | C9B—C10B—H10D  | 109.7       |
| H10A—C10A—H10B | 108.2       | H10C—C10B—H10D | 108.2       |
| C10A—C11A—C12A | 110.36 (10) | C10B—C11B—C12B | 110.43 (10) |
| C10A—C11A—C6A  | 110.84 (10) | C10B—C11B—C6B  | 110.44 (10) |
| C12A—C11A—C6A  | 108.21 (10) | C12B—C11B—C6B  | 108.16 (10) |
| C10A—C11A—H11A | 109.1       | C10B—C11B—H11B | 109.3       |
| C12A—C11A—H11A | 109.1       | C12B—C11B—H11B | 109.3       |
| C6A—C11A—H11A  | 109.1       | C6B—C11B—H11B  | 109.3       |
| C1A—C12A—C13A  | 108.97 (10) | C1B—C12B—C13B  | 108.82 (10) |
| C1A—C12A—C11A  | 107.58 (10) | C1B—C12B—C11B  | 107.82 (10) |
| C13A—C12A—C11A | 112.58 (10) | C13B—C12B—C11B | 112.46 (10) |
| C1A—C12A—H12A  | 109.2       | C1B—C12B—H12B  | 109.2       |
| C13A—C12A—H12A | 109.2       | C13B—C12B—H12B | 109.2       |
| C11A—C12A—H12A | 109.2       | C11B—C12B—H12B | 109.2       |
| C4A—C13A—C12A  | 110.14 (10) | C4B—C13B—C12B  | 109.99 (10) |
| C4A—C13A—H13C  | 109.6       | C4B—C13B—H13A  | 109.7       |
| C12A—C13A—H13C | 109.6       | C12B—C13B—H13A | 109.7       |
| C4A—C13A—H13D  | 109.6       | C4B—C13B—H13B  | 109.7       |
| C12A—C13A—H13D | 109.6       | C12B—C13B—H13B | 109.7       |
| H13C—C13A—H13D | 108.1       | H13A—C13B—H13B | 108.2       |
| C9A—C14A—C1A   | 109.70 (10) | C9B—C14B—C1B   | 109.63 (9)  |
| C9A—C14A—H14C  | 109.7       | C9B—C14B—H14A  | 109.7       |
| C1A—C14A—H14C  | 109.7       | C1B—C14B—H14A  | 109.7       |
| C9A—C14A—H14D  | 109.7       | C9B—C14B—H14B  | 109.7       |
| C1A—C14A—H14D  | 109.7       | C1B—C14B—H14B  | 109.7       |
| H14C—C14A—H14D | 108.2       | H14A—C14B—H14B | 108.2       |
| N1A—C15A—C3A   | 178.82 (14) | N1B—C15B—C3B   | 177.97 (13) |
| O2A—C16A—N2A   | 128.92 (11) | O2B—C16B—N2B   | 129.37 (11) |
| O2A—C16A—O1A   | 121.11 (11) | O2B—C16B—O1B   | 120.99 (11) |
| N2A—C16A—O1A   | 109.97 (10) | N2B—C16B—O1B   | 109.64 (10) |

*Hydrogen-bond geometry (Å, °) for 4h2.*

| <i>D</i> —H $\cdots$ <i>A</i>         | <i>D</i> —H | H $\cdots$ <i>A</i> | <i>D</i> $\cdots$ <i>A</i> | <i>D</i> —H $\cdots$ <i>A</i> |
|---------------------------------------|-------------|---------------------|----------------------------|-------------------------------|
| N2A—<br>H2A $\cdots$ O2A <sup>i</sup> | 0.96        | 1.99                | 2.9337 (13)                | 168                           |

|                                 |      |      |             |     |
|---------------------------------|------|------|-------------|-----|
| N2B—<br>H2B...O2B <sup>ii</sup> | 0.90 | 2.02 | 2.8885 (13) | 162 |
|---------------------------------|------|------|-------------|-----|

Symmetry codes: (i)  $-x+1, -y+2, -z+1$ ; (ii)  $-x, -y+1, -z+2$ .

Document origin: *publCIF* [Westrip, S. P. (2010). *J. Apply. Cryst.*, **43**, 920-925].
